# Supplementary material
Source: publisher figshare collection journal article supplement (https://acs.figshare.com/ndownloader/files/4600867)

# Supporting Information

## Cyclization of Non-Terminal Alkynic $\beta$ -Keto Esters Catalyzed by Gold(I) Complex with a Semihollow, End-Capped Triethynylphosphine Ligand

Hideto Ito, Yusuke Makida, Atsuko Ochida, Hirohisa Ohmiya and Masaya Sawamura\*  
*Department of Chemistry, Faculty of Science, Hokkaido University,  
Sapporo 060-0810, Japan*

1. General . . . . . S1
2. General Procedure for Alkyne Cyclizations . . . . . S1
3. Preparation of Substrate . . . . . S2
4. Cyclization Products . . . . . S11
5. References . . . . . S15
6. Copies of NMR Spectrum Charts . . . . . S16

### General.

NMR spectra were recorded on a Varian Gemini 2000 spectrometer, operating at 300 MHz for  $^1\text{H}$  NMR, 75.4 MHz for  $^{13}\text{C}$  NMR and 121.4 MHz for  $^{31}\text{P}$  NMR. Chemical shift values for  $^1\text{H}$ ,  $^{13}\text{C}$  and  $^{31}\text{P}$  NMR are reference to  $\text{Me}_4\text{Si}$ , the residual solvent resonances and external aqueous 85%  $\text{H}_3\text{PO}_4$  respectively. Mass spectrometry (JEOL JMS-FABmate for EI-MS, JEOL JMS-700TZ for ESI-MS) and elemental analysis were performed at the Center for Instrument Analysis, Hokkaido University. Triethynylphosphine ligands **1a**, **1b**, and **1c** were prepared according to the reported procedure.<sup>1</sup>  $\text{AgNTf}_2$  was prepared from  $\text{Ag}_2\text{O}$  and  $\text{HN}(\text{SO}_2\text{CF}_3)_2$ .<sup>2</sup> Phosphine ligands,  $\text{PPh}_3$  and  $\text{P}(\text{OPh})_3$  were commercially available. Gold complexes  $\{\text{AuCl}(\text{ligand})\}$  were synthesized by the reported method.<sup>1</sup> Anhydrous solvents used in synthesis of materials were purchased from Kanto Chemical Co. and used without further purifications. Anhydrous  $\text{CH}_2\text{Cl}_2$  used in Au-catalyzed cyclizations was purchased from Kanto Chemical Co. and degassed before use. Gel permeation chromatography (GPC) was performed by LC-908 (Japan Analytical Industry Ltd., two in-line JAIGEL-2H,  $\text{CHCl}_3$ , 3.5 mL/min, UV and RI detectors). TLC analyses were performed on commercial glass plates bearing 0.25-mm layer of Merck Silica gel 60F<sub>254</sub>. Silica gel (Kanto Chemical Co., Silica gel 60 N, spherical, neutral) was used for column chromatography. PTLC purification was performed on commercial glass plates bearing 1-mm layer of Merck Silica gel 60F<sub>254</sub>. All reactions were carried out under argon atmosphere unless otherwise noted.

### General Procedure for Alkyne Cyclizations.

$\{\text{AuCl}(\text{ligand})\}$  (1 mol%) was placed in an open vial tube, and was dissolved in  $\text{CH}_2\text{Cl}_2$  (ca. 0.5 mL).  $\text{AgNTf}_2$  (3.2 mg) was added, and a mixture was stirred at 25 °C for 10 min. The resulting white suspension was filtered through celite to a screw vial. The resulting colorless solution was first concentrated with a stream of Ar gas, and then was dried *in vacuo*. The tube was brought into a glove box. A magnetic stirring bar was placed in the tube, and the gold complex was dissolved in degassed  $\text{CH}_2\text{Cl}_2$ . A substrate (0.4 mmol) was added to the catalyst solution. The tube was sealed with a cap equipped with a Teflon-coated silicon rubber septum. The vial tube was brought out of the glove box, and set into a water bath adjusted at 25 °C. After stirring for a given time, the reaction mixture was passed through a pad of silica gel and concentrated to dryness. Purification by flash chromatography on silica gel gave cyclization products.

## Preparation of Substrates

### Methyl 2-Acetyl-6-octynoate (**2a**) (keto/enol = 89/11)

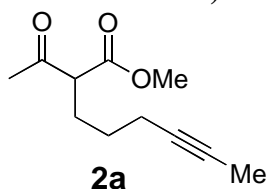

To a suspension of NaH (60 wt. %, 910 mg, 22.8 mmol) in THF (11 mL) and DMF (11 mL) was added dropwise methyl acetoacetate (2.50 mL, 22.8 mmol) at 0 °C. The mixture was stirred at this temperature for 10 min and at room temperature for 1 h. Then, 6-iodo-2-pentyne (4.65 g, 22.4 mmol) was added, and the reaction mixture was stirred overnight (monitored by TLC). The resulting suspension was diluted with ether, and quenched with saturated aqueous  $\text{NH}_4\text{Cl}$ . The organic layer was washed with saturated aqueous  $\text{NH}_4\text{Cl}$  ( $3 \times 10$  mL), and separated. The combined aqueous layer was extracted with ether ( $3 \times 10$  mL). The organic layers were combined, dried over  $\text{MgSO}_4$ , filtered and concentrated under reduced pressure. The residue was purified by flash chromatography on silica gel (hexanes/EtOAc: 99/1 to 90/10) to afford **2a** as a colorless oil (1.91 g, 44%, keto/enol = 89/11).  $^1\text{H}$  NMR ( $\text{CDCl}_3$ )  $\delta$  1.38–1.61 (m, 2H), 1.77 (t,  $J = 2.4$  Hz, 3H), 1.90–2.00 (q,  $J = 7.8$  Hz, 2H), 2.04 (s,  $0.11 \times 3\text{H}$ ), 2.10–2.20 (m, 2H), 2.24 (s,  $0.89 \times 3\text{H}$ ), 3.47 (t,  $J = 7.5$  Hz,  $0.89 \times 1\text{H}$ ), 3.75 (s,  $0.89 \times 3\text{H}$ ), 3.78 (s,  $0.11 \times 3\text{H}$ ), 12.72 (s,  $0.11 \times 1\text{H}$ ).  $^{13}\text{C}$  NMR of **2a-keto** ( $\text{CDCl}_3$ )  $\delta$  3.21, 18.28, 26.49, 27.16, 28.65, 52.30, 59.09, 76.18, 78.04, 170.28, 203.18. Anal. Calcd for  $\text{C}_{11}\text{H}_{16}\text{O}_3$ : C, 67.32; H, 8.22%. Found: C, 67.19; H, 8.17%. HRMS ( $\text{EI}^+$ ) Calcd for  $\text{C}_{11}\text{H}_{16}\text{O}_3$  [ $\text{M}$ ] $^+$ :  $m/z$  196.1099. Found:  $m/z$  196.1102.

### Methyl 2-Acetyl-6-undecynoate (**2b**) (keto/enol = 87/13)

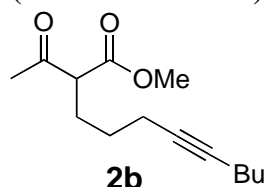

**2b** was prepared according to the procedure for the preparation of **2a**, employing methyl acetoacetate (2.0 mL, 18.0 mmol), NaH (804 mg, 20.1 mmol), 9-iodo-5-nonyne (4.72 g, 18.6 mmol) and hexanes/EtOAc (99/1 to 90/10) as the eluent. Colorless oil (1.69 g, 37%, keto/enol = 87/13).  $^1\text{H}$  NMR ( $\text{CDCl}_3$ )  $\delta$  0.90 (t,  $J = 7.2$  Hz, 3H), 1.33–1.54 (m, 6H), 1.91–2.00 (q,  $J = 7.8$  Hz, 2H), 2.04 (s,  $0.13 \times 3\text{H}$ ), 2.10–2.22 (m, 4H), 2.24 (s,  $0.87 \times 3\text{H}$ ), 3.47 (t,  $J = 7.5$  Hz,  $0.87 \times 1\text{H}$ ), 3.75 (s,  $0.87 \times 3\text{H}$ ), 3.75 (s,  $0.13 \times 3\text{H}$ ), 12.72 (s,  $0.13 \times 1\text{H}$ ).  $^{13}\text{C}$  NMR of **2b-keto** ( $\text{CDCl}_3$ )  $\delta$  13.45, 18.23, 18.33, 21.77, 26.59, 27.16, 28.63, 31.00, 52.31, 59.11, 78.84, 81.03, 170.31, 203.23. Anal. Calcd for  $\text{C}_{14}\text{H}_{22}\text{O}_3$ : C, 70.56; H, 9.30%. Found: C, 70.20; H, 9.24%. HRMS ( $\text{EI}^+$ ) Calcd for  $\text{C}_{14}\text{H}_{22}\text{O}_3$  [ $\text{M}$ ] $^+$ :  $m/z$  238.1569. Found:  $m/z$  238.1570.

### Methyl 2-Acetyl-8-methyl-6-nonynoate (**2c**) (keto/enol = 97/3)

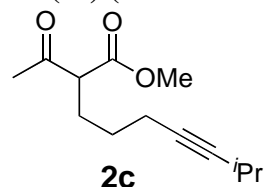

**2c** was prepared according to the procedure for the preparation of **2a**, employing methyl acetoacetate (1.10 mL, 9.91 mmol), NaH (425 mg, 10.6 mmol), 7-iodo-2-methyl-3-heptyne (2.03 g, 8.60 mmol) for 14 h at 50 °C and hexanes/EtOAc (99/1 to 90/10) as the eluent. Colorless oil (983 mg, 51%, keto/enol = 97/3).  $^1\text{H}$  NMR ( $\text{CDCl}_3$ )  $\delta$  1.13 (d,  $J = 6.9$  Hz, 6H), 1.41–1.53 (m, 2H), 1.95 (q,  $J =$

7.5 Hz, 2H), 2.18 (td,  $J = 7.5$  Hz, 2.4 Hz, 2H), 2.24 (s, 3H), 2.25 (m, 1H), 3.47 (t,  $J = 7.5$  Hz, 1H), 3.74 (s, 3H) (enol: 12.71 (m, 1H)).  $^{13}\text{C}$  NMR of **2c-keto** ( $\text{CDCl}_3$ )  $\delta$  18.46, 20.52, 23.41, 26.78, 27.32, 28.81, 52.51, 59.31, 78.22, 87.04, 170.51, 203.44. HRMS ( $\text{EI}^+$ ) Calcd for  $\text{C}_{13}\text{H}_{19}\text{O}_3$   $[\text{M}-\text{H}]^+$ :  $m/z$  223.1334. Found:  $m/z$  223.1325.

### Methyl 2-Acetyl-7-phenyl-6-heptynoate (**2d**) (keto/enol = 90/10)

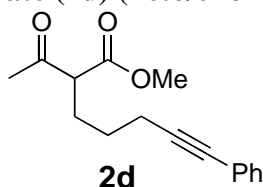

The **2d** was prepared according to the procedure for the preparation of **2a**, employing methyl acetoacetate (1.22 mL, 11.0 mmol), NaH (492 mg, 12.3 mmol), 5-iodo-1-phenyl-1-pentyne<sup>3</sup> (2.86 g, 12.4 mmol) for 15 h and hexanes/EtOAc (99/1 to 90/10) as the eluent. Colorless oil (1.65 g, 58%, keto/enol = 90/10).  $^1\text{H}$  NMR ( $\text{CDCl}_3$ )  $\delta$  1.54–1.74 (m, 2H), 1.99–2.09 (m, 0.90×2H, 0.10×2H), 2.07 (s, 0.10×3H), 2.25 (s, 0.90×3H), 2.45 (t,  $J = 7.2$  Hz, 2H), 3.49 (t,  $J = 7.2$  Hz, 0.90×1H), 3.75 (s, 0.90×3H), 3.77 (s, 0.10×3H), 7.23–7.32 (m, 3H), 7.34–7.43 (m, 2H), 12.75 (s, 0.10×1H).  $^{13}\text{C}$  NMR of **2d-keto** ( $\text{CDCl}_3$ )  $\delta$  19.04, 26.29, 27.23, 28.77, 52.41, 59.12, 81.27, 89.00, 123.76, 127.76, 128.29, 131.62, 170.29, 203.12. Anal. Calcd for  $\text{C}_{16}\text{H}_{18}\text{O}_3$ : C, 74.39; H, 7.02%. HRMS ( $\text{EI}^+$ ) Calcd for  $\text{C}_{16}\text{H}_{18}\text{O}_3$   $[\text{M}]^+$ :  $m/z$  258.1256. Found:  $m/z$  258.1257.

### Scheme 2. Preparation of **2e**.

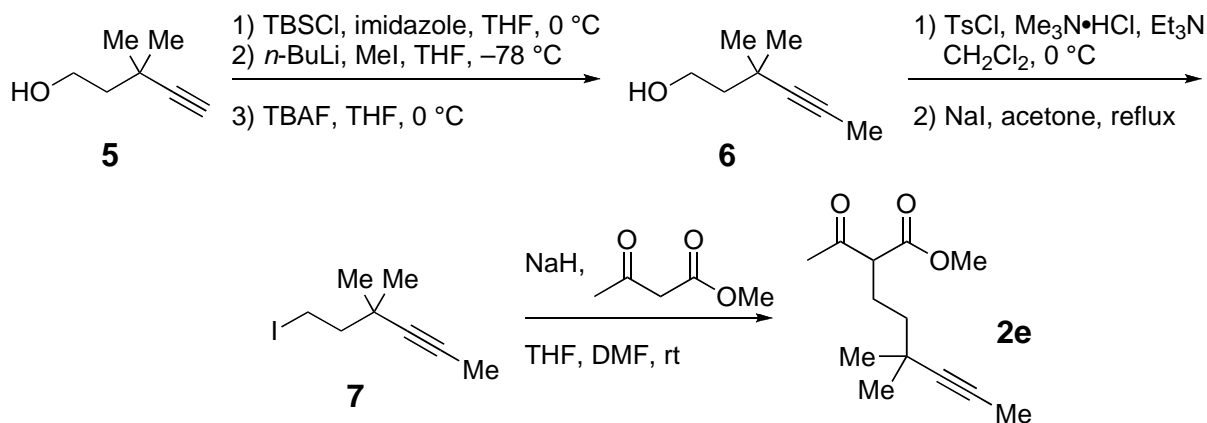

### 3,3-Dimethyl-4-hexyn-1-ol (**6**)

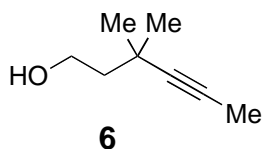

To a solution of TBSCl (2.63 g, 17.1 mmol) in THF (8 mL) was added 3,3-dimethyl-4-pentyn-1-ol (**5**)<sup>4</sup> (1.83 g) in THF (8 mL) at 0 °C. Then imidazole was added and stirred at this temperature for 20 min (monitored by TLC). The resulting white suspension was quenched with saturated aqueous  $\text{NaHCO}_3$  at 0 °C. The organic layer was washed with water ( $3 \times 10$  mL), and separated. The combined aqueous layer was extracted with ether ( $3 \times 10$  mL). The organic layers were combined, dried over  $\text{MgSO}_4$ , filtered and concentrated under reduced pressure to afford the silylated compound as a crude product (colorless oil, 3.81 g). This crude product was used in the next step without further purification.

To a solution of the silylated compound (3.81 g 16.3 mmol) in THF (16 mL) was added dropwise  $n\text{-BuLi}$  (11.3 mL of 1.52 M in hexane, 17.2 mmol) at 0 °C under Ar atmosphere. The reaction mixture

was stirred at this temperature for 30 min (white suspension was observed). Then MeI (2.16 mL, 32.7 mmol) was added and the mixture was stirred at  $-78\text{ }^{\circ}\text{C}$  for 30 min. The reaction mixture was allowed to warm to room temperature and stirred for 90 min (consumption of starting material was checked by  $^1\text{H}$  NMR) before being quenched with saturated aqueous  $\text{NH}_4\text{Cl}$ . The organic layer was washed with water ( $3 \times 10\text{ mL}$ ), and separated. The combined aqueous layer was extracted with ether ( $3 \times 10\text{ mL}$ ). The organic layers were combined, dried over  $\text{MgSO}_4$ , filtered and concentrated under reduced pressure to afford the methylated compound as a crude product (colorless oil, 3.84 g). This crude product was used in the next step without further purification.

To a solution of the methylated compound (3.84 g) in THF (48 mL) was added TBAF (17.9 mL of 1.0 M in THF, 17.9 mmol) at  $0\text{ }^{\circ}\text{C}$  under Ar atmosphere. After stirring at this temperature for 2 h and at rt for 18 h, the reaction mixture was quenched with water. The organic layer was washed with water ( $3 \times 20\text{ mL}$ ), and separated. The combined aqueous layer was extracted with ether ( $3 \times 20\text{ mL}$ ). The organic layers were combined, dried over  $\text{MgSO}_4$ , filtered and concentrated under reduced pressure to afford a mixture of **6** and a small amount of siloxane as a colorless oil (1.71 g, 3 steps over all 83%). This mixture was used in the next step without further purification.  $^1\text{H}$  NMR ( $\text{CDCl}_3$ )  $\delta$  1.21 (s, 6H), 1.67 (t,  $J = 6.6\text{ Hz}$ , 2H), 1.78 (s, 3H), 2.14–2.24 (br s, 1H), 3.84 (br q,  $J = 6.0\text{ Hz}$ , 2H).  $^{13}\text{C}$  NMR ( $\text{CDCl}_3$ )  $\delta$  3.26, 29.19, 29.83, 45.43, 60.55, 76.42, 86.33.

#### 4,4-Dimethyl-6-iodo-2-hexyne (**7**)

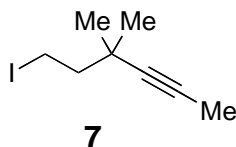

Tosylation of alcohol was conducted by using the reported method<sup>5</sup>. To a solution of  $\text{Me}_3\text{N}\cdot\text{HCl}$  (112 mg, 1.11 mmol),  $\text{Et}_3\text{N}$  (3.08 mL, 22.1 mmol) and **6** (1.39 g, 11.0 mmol, containing trace amount of siloxane) was added  $\text{TsCl}$  (3.18 g, 16.5 mmol) in two portions at  $0\text{ }^{\circ}\text{C}$  under Ar atmosphere. The resulting orange suspension was stirred at this temperature for 5 min (monitored by TLC), and then quenched with water. The organic layer was washed with water ( $3 \times 10\text{ mL}$ ), and separated. The combined aqueous layer was extracted with  $\text{CH}_2\text{Cl}_2$  ( $3 \times 10\text{ mL}$ ). The organic layers were combined, dried over  $\text{MgSO}_4$ , filtered and concentrated under reduced pressure to afford the desired tosylated product as a crude product (yellow oil, 3.17 g, >100%). This mixture was used in the next step without further purification.

To a 200 mL-three-necked, round-bottomed flask equipped with a condenser was added NaI (8.40 g, 55.8 mmol), and the mixture was vigorously stirred at  $150\text{ }^{\circ}\text{C}$  for 6 h in *vacuo*. After that, a flask was cooled to rt and charged with Ar. Acetone (55 mL) and the crude tosylated product (3.17 g, 11.0 mmol) was added to a flask, and the mixture was stirred at  $80\text{ }^{\circ}\text{C}$  overnight. The resulting orange suspension was cooled to rt, a half of acetone was removed by the evaporator, and water was added. The organic layer was washed with water ( $3 \times 30\text{ mL}$ ), and separated. The combined aqueous layer was extracted with pentane ( $3 \times 30\text{ mL}$ ). The organic layer was combined, dried over  $\text{MgSO}_4$ , filtered and concentrated under reduced pressure. Flash silica gel column purification (pentane) of the crude product afforded **7** as a colorless oil (2.25 g, 2 steps overall 86%).  $^1\text{H}$  NMR ( $\text{CDCl}_3$ )  $\delta$  1.17 (s, 6H), 1.77 (s, 3H), 1.97–2.05 (m, 2H), 3.25–3.33 (m, 2H).  $^{13}\text{C}$  NMR ( $\text{CDCl}_3$ )  $\delta$  0.76, 3.30, 28.92, 33.18, 48.11, 76.22, 84.30. HRMS ( $\text{EI}^+$ ) Calcd for  $\text{C}_8\text{H}_{13}\text{I}$  [ $\text{M}$ ] $^+$ :  $m/z$  236.0062. Found:  $m/z$  236.0057.



**Methyl 2-Acetyl-5,5-dimethyl-6-octynoate (2e) (keto/enol = 93/7)**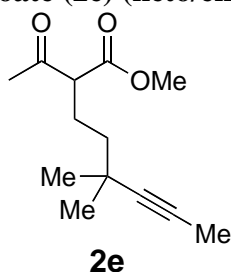

**2e** was prepared according to the procedure for the preparation of **2a**, employing methyl acetoacetate (1.11 mL, 10.0 mmol), NaH (225 mg, 5.62 mmol), **7** (1.18 g, 5.00 mmol) for 38 h and the eluent (hexanes/EtOAc: 99/1 to 85/15) afforded **2e** as a colorless oil (792 mg, 71%, keto/enol = 93/7). <sup>1</sup>H NMR (CDCl<sub>3</sub>) δ 1.16 (s, 0.93×6H), 1.17 (s, 0.07×6H), 1.26–1.45 (m, 2H), 1.78 (s, 0.93×3H), 1.80 (s, 0.07×3H), 1.95–2.06 (m, 2H, 0.07×3H), 2.25 (s, 0.93×3H), 3.43 (t, *J* = 7.5 Hz, 0.93×1H), 3.75 (s, 0.93×3H), 3.76 (s, 0.07×3H), 12.65 (s, 0.07×1H). <sup>13</sup>C NMR of **2e-keto** (CDCl<sub>3</sub>) δ 3.14, 24.12, 28.47, 28.89, 29.24, 30.59, 40.61, 52.11, 59.64, 75.51, 85.52, 170.26, 203.26. Anal. Calcd for C<sub>13</sub>H<sub>20</sub>O<sub>3</sub>: C, 69.61; H, 8.99%. HRMS (EI<sup>+</sup>) Calcd for C<sub>13</sub>H<sub>20</sub>O<sub>3</sub> [M]<sup>+</sup>: *m/z* 224.1412. Found: *m/z* 224.1410.

**Scheme 2. Preparation of 2f<sup>6</sup>.**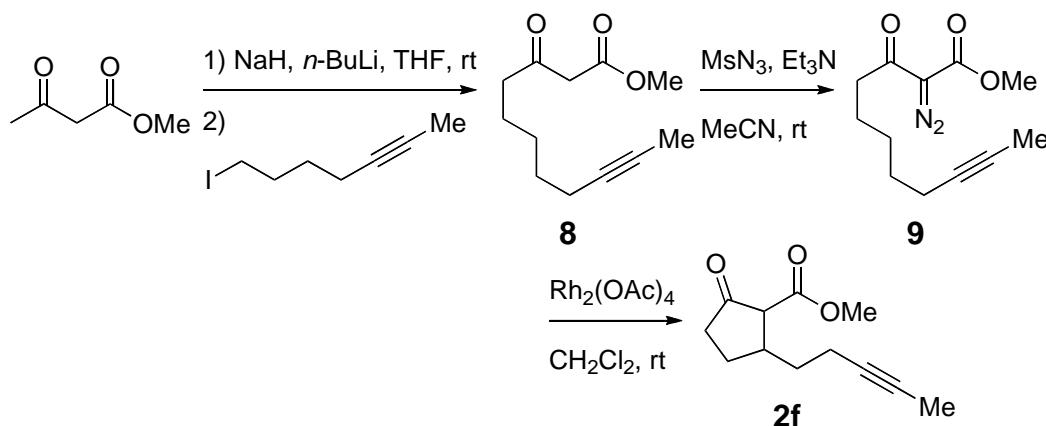**Methyl 3-Oxo-9-undecynoate (8) (keto/enol = 96/4)**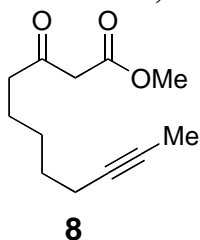

To a solution of NaH (60 wt. %, 884 mg, 22.1 mmol) in THF (40 mL) was added dropwise methyl acetoacetate (2.22 mL, 20.0 mmol) at 0 °C under Ar atmosphere. The mixture was stirred at this temperature for 10 min and at room temperature for 2 h. Then, the solution was cooled to –78 °C, *n*-BuLi (12.7 mL of 1.65 M in hexane, 20.0 mmol) was added dropwise, and the mixture was stirred at this temperature for 30 min and at 0 °C for 2 h. 7-Iodo-2-heptyne (4.62 g, 20.8 mmol) was added, and the reaction mixture was stirred at 0 °C overnight. The resulting suspension was diluted with ether, and quenched with saturated aqueous NH<sub>4</sub>Cl. The organic layer was washed with saturated aqueous NH<sub>4</sub>Cl (3 × 30 mL), and separated. The combined aqueous layer was extracted with ether (3 × 30 mL). The organic layers were combined, dried over MgSO<sub>4</sub>, filtered and concentrated under reduced pressure. Purification by flash chromatography on silica gel (hexanes/EtOAc: 99/1 to 93/7) provided **8** as a colorless oil (3.04 g, 72%, keto/enol = 96/4). <sup>1</sup>H NMR of **8-keto** (CDCl<sub>3</sub>) δ 1.32–1.54 (m, 4H), 1.61

(quint,  $J = 7.5$  Hz, 2H), 1.77 (t,  $J = 2.4$  Hz, 3H), 2.12 (m, 2H), 2.56 (t,  $J = 7.2$  Hz, 2H), 3.63 (s, 3H), 3.74 (s, 3H) (**8-enol**: 2.21 (t,  $J = 7.5$  Hz, 2H), 3.73 (s, 3H), 5.00 (s, 1H), 12.03 (s, 1H)).  $^{13}\text{C}$  NMR of **8-keto** ( $\text{CDCl}_3$ )  $\delta$  3.34, 18.43, 22.86, 28.05, 28.61, 42.82, 48.91, 52.24, 75.54, 78.85, 167.61, 202.63. HRMS ( $\text{EI}^+$ ) Calcd for  $\text{C}_{12}\text{H}_{19}\text{O}_3$  [ $\text{M}+\text{H}$ ] $^+$ :  $m/z$  211.1334. Found:  $m/z$  211.1351.

#### Methyl 2-Diazo-3-oxo-9-undecynoate (**9**)

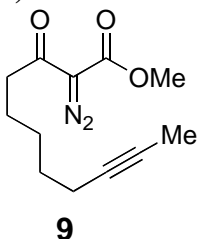

To a suspension of **8** (2.44 g, 11.6 mmol) and  $\text{MsN}_3$  (1.47 g, 12.2 mmol) in MeCN (23 mL) was added  $\text{Et}_3\text{N}$  (3.23 mL, 23.2 mmol) at room temperature under Ar atmosphere. After stirring for 7 h, the reaction mixture was diluted with 1 M NaOH (20 mL), and extracted with EtOAc ( $3 \times 20$  mL). The organic layers were combined, dried over  $\text{MgSO}_4$ , filtered and concentrated under reduced pressure. The crude product was purified by flash chromatography on silica gel (hexanes/EtOAc: 99/1 to 93/7) to give **9** as a pale yellow oil (2.61 g, 95%):  $^1\text{H}$  NMR ( $\text{CDCl}_3$ )  $\delta$  1.37–1.57 (m, 4H), 1.65 (quint,  $J = 7.5$  Hz, 2H), 1.78 (t,  $J = 2.4$  Hz, 3H), 2.13 (m, 2H), 2.86 (t,  $J = 7.5$  Hz, 2H), 3.86 (s, 3H).  $^{13}\text{C}$  NMR ( $\text{CDCl}_3$ )  $\delta$  3.24, 18.47, 23.67, 28.23, 28.58, 39.91, 52.01, 75.42, 78.97, 161.86, 192.88, 192.90. Anal. Calcd for  $\text{C}_{12}\text{H}_{16}\text{N}_2\text{O}_3$ : C, 61.00; H, 6.83; N, 11.86%. Found: C, 61.00; H, 6.76; N 11.75%. HRMS ( $\text{EI}^+$ ) Calcd for  $\text{C}_{12}\text{H}_{16}\text{N}_2\text{O}_3$  [ $\text{M}$ ] $^+$ :  $m/z$  236.1161. Found:  $m/z$  236.1153.

#### Methyl 2-Oxo-5-(3-pentynyl)cyclopentanecarboxylate (**2f**) (keto/enol = 97/3)

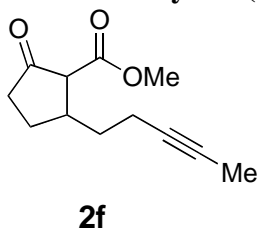

To a suspension of  $\text{Rh}_2(\text{OAc})_4$  (88.8 mg, 0.201 mmol) in  $\text{CH}_2\text{Cl}_2$  (33 mL) was added dropwise **9** (1.19 g, 5.03 mmol) in  $\text{CH}_2\text{Cl}_2$  (33 mL) by a syringe pump (at the rate of 30 mL/h) at room temperature under Ar atmosphere. After stirring for 3.5 h, the mixture was filtered through a suction funnel to recover the catalyst (61.8 mg). The filtrate was concentrated under reduced pressure, and purified by flash chromatography on silica gel (hexanes/EtOAc: 70/30) to afford **2f** as a colorless oil (895 mg, 75%, keto/enol = 97/3).  $^1\text{H}$  NMR of **2f-keto** ( $\text{CDCl}_3$ )  $\delta$  1.41–1.84 (m, 3H), 1.77 (t,  $J = 2.4$  Hz, 3H), 2.10–2.50 (m, 5H), 2.64–2.80 (m, 1H), 2.89 (d,  $J = 11.4$  Hz, 1H), 3.77 (s, 3H) (**2f-enol**: 3.71 (s, 3H), 10.61 (s, 1H)).  $^{13}\text{C}$  NMR of **2f-keto** ( $\text{CDCl}_3$ )  $\delta$  3.27, 16.57, 26.88, 33.96, 38.28, 40.44, 52.40, 61.36, 76.24, 77.96, 169.86, 211.78. Anal. Calcd for  $\text{C}_{12}\text{H}_{16}\text{O}_3$ : C, 69.21; H 7.74%. Found: C, 68.87; H, 7.73%. HRMS ( $\text{EI}^+$ ) Calcd for  $\text{C}_{12}\text{H}_{16}\text{O}_3$  [ $\text{M}$ ] $^+$ :  $m/z$  208.1099. Found:  $m/z$  208.1086.

### Scheme 3. Preparation of **2g**.<sup>7</sup>

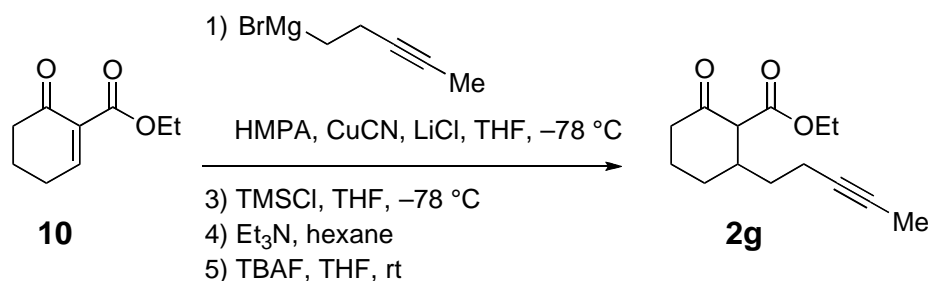

### Ethyl 2-Oxo-6-(3-pentynyl)cyclohexanecarboxylate (**2g**) (keto/enol = 78/22).

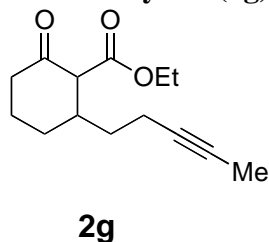

To a 100 mL of two-necked, round-bottomed flask equipped with a condenser and a dropping funnel was added Mg (295 mg, 12.3 mmol), and heated by a heat gun and vigorously stirred for 10 min in *vacuo*. After that, a flask was cooled to rt, and charged with Ar. THF (10 mL) was then added. To this mixture, a solution of 5-bromo-2-pentyne (2.16 mL, 14.8 mmol) in THF (10 mL) was added dropwise over 10 min, and stirred for 20 min. The mixture was cooled to  $-78^\circ\text{C}$ . A dropping funnel was replaced to a septum, CuCN (50.2 mg, 0.50 mmol), LiCl (21.7 mg, 0.50 mmol) and HMPA (3.87 mL, 22.0 mmol) was added to the flask, and the mixture was stirred for 20 min. A solution of **10**<sup>8</sup> (1.54 g, 10.0 mmol) and TMSCl (2.53 mL, 20.0 mmol) in THF (10 mL) was added dropwise over 40 min, and additionally stirred for 3.5 h.  $\text{Et}_3\text{N}$  (10 mL) and hexane (50 mL) were added to the reaction mixture at  $-78^\circ\text{C}$ . The organic layer was washed with water ( $3 \times 20$  mL), and separated. The combined aqueous layer was extracted with ether ( $3 \times 20$  mL). The organic layers were combined, dried over  $\text{MgSO}_4$ , filtered and concentrated under reduced pressure. The crude product was treated with TBAF (12.0 mL of 1.0 M in THF, 12.0 mmol) in THF (30 mL) at room temperature for 9 h, and then purified by flash chromatography on silica gel followed by GPC to afford **2g** as a colorless oil (573 mg, 24%, keto/enol = 78/22).  $^1\text{H}$  NMR ( $\text{CDCl}_3$ )  $\delta$  1.29 (t,  $J = 7.2$  Hz, 0.78H $\times$ 3H), 1.33 (t,  $J = 7.2$  Hz, 0.22 $\times$ 3H), 1.34–1.75 (m, 4H), 1.77 (t,  $J = 2.4$  Hz, 0.78 $\times$ 3H), 1.78 (t,  $J = 2.4$  Hz, 0.22 $\times$ 3H), 2.07–2.43 (m, 6H), 2.50 (br dt,  $J = 14.1$  Hz, 9.3 Hz, 0.78 $\times$ 1H), 2.62 (m, 0.22 $\times$ 1H), 3.13 (dd,  $J = 10.8$  Hz, 0.81 Hz, 0.78 $\times$ 1 H), 4.17–4.31 (m, 2H), 12.44 (s, 0.22H $\times$ 1H).  $^{13}\text{C}$  NMR of **2g**-keto ( $\text{CDCl}_3$ )  $\delta$  3.10, 13.86, 15.79, 24.31, 28.14, 33.67, 39.89, 40.81, 60.72, 63.18, 75.92, 77.80, 169.58, 205.94. Anal. Calcd for  $\text{C}_{14}\text{H}_{20}\text{O}_3$ : C, 71.16; H, 8.53%. Found: C, 70.87; H, 8.56%. HRMS ( $\text{EI}^+$ ) Calcd for  $\text{C}_{14}\text{H}_{20}\text{O}_3$   $[\text{M}]^+$ :  $m/z$  236.1412. Found:  $m/z$  236.1406.

### Scheme 6. Preparation of **2h**.<sup>9</sup>

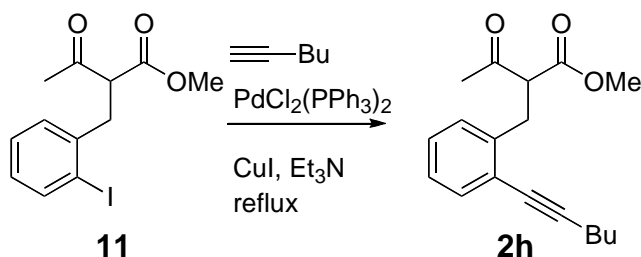

### Methyl 2-[2-(1-Hexynyl)benzyl]-3-oxobutanoate (**2h**) (keto/enol = 98/2)

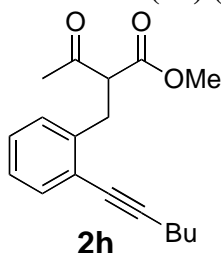

To a solution of methyl 2-(2-iodobenzyl)-3-oxobutanoate (**11**)<sup>9</sup> (1.36 g, 4.08 mmol) and 1-hexyne (0.557 mL, 4.80 mmol) in Et<sub>3</sub>N (16 mL) was added PdCl<sub>2</sub>(PPh<sub>3</sub>)<sub>2</sub> (57.7 mg, 0.0797 mmol). The mixture was stirred for 10 min and CuI (7.9 mg, 0.041 mmol) was added. The resulting mixture was then stirred at room temperature under Ar atmosphere for 18 h. The ammonium salt was removed by filtration, and the solvent was removed under reduced pressure. The crude product was purified by flash chromatography on silica gel (hexanes/EtOAc: 99/1 to 91/9), followed by GPC to afford **2h** as a pale yellow oil (402 mg, 34%, keto/enol = 98/2). The same product could be prepared from 2-(2-bromobenzyl)-3-oxobutanoate, PdCl<sub>2</sub>(PPh<sub>3</sub>)<sub>2</sub> (5 mol %), CuI (2 mol %) and 1-hexyne (1.5 eq) at 100 °C for 18 h (31%). <sup>1</sup>H NMR of **2h-keto** (CDCl<sub>3</sub>) δ 0.95 (t, *J* = 7.2 Hz, 3H), 1.40-1.66 (m, 4H), 2.19 (s, 3H), 2.45 (t, *J* = 6.9 Hz, 2H), 3.29 (qd, *J* = 13.5 Hz, 7.5 Hz, 2H), 3.68 (s, 3H), 4.05 (t, *J* = 7.5 Hz, 1H), 7.13-7.19 (m, 3H), 7.37 (m, 1H) (**2h-enol**: 12.97 (s, 1H)). <sup>13</sup>C NMR of **2h-keto** (CDCl<sub>3</sub>) δ 13.37, 19.00, 21.83, 29.43, 30.59, 32.90, 52.13, 59.23, 78.54, 95.15, 123.48, 126.66, 127.70, 129.72, 132.36, 139.61, 169.68, 202.74. Anal. Calcd for C<sub>18</sub>H<sub>22</sub>O<sub>3</sub>: C, 75.50; H, 7.74%. Found: C, 75.51; H, 7.85%. HRMS (EI<sup>+</sup>) Calcd for C<sub>18</sub>H<sub>22</sub>O<sub>3</sub> [M]<sup>+</sup>: *m/z* 286.1569. Found: *m/z* 286.1557.

### Scheme 4. Preparation of **2i**.

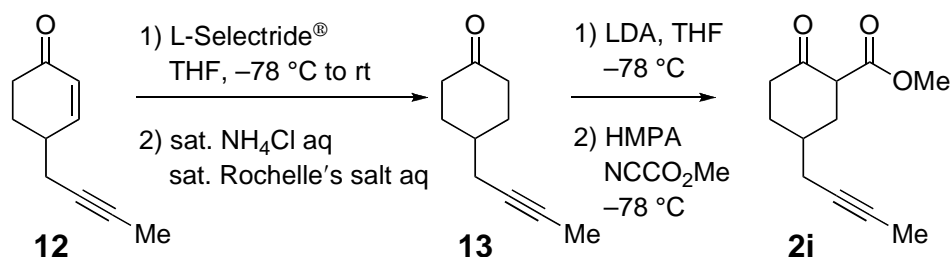

### 4-(2-Butynyl)cyclohexanone (**13**)

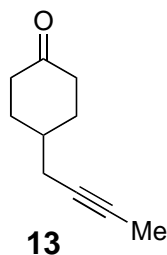

To a solution of 4-(2-butynyl)-2-cyclohexenone (**12**)<sup>10</sup> (3.57 g, 24.1 mmol) in Et<sub>2</sub>O (96 mL) was added dropwise L-selectride® (25.3 mL of 1.0 M in THF, 25.3 mL) at -78 °C under Ar atmosphere. After stirring for 1 h at this temperature, the reaction mixture was allowed to warm slowly to room temperature (over 1 h) and stirred for 1 h. The reaction mixture was quenched with sat. NH<sub>4</sub>Cl aq and sat. Rochell's salt solution, and stirred for 30 min. The organic layer was washed with sat. Rochell's salt solution (3 × 50 mL), and separated. The combined aqueous layer was extracted with ether (3 × 50 mL). The organic layers were combined, dried over MgSO<sub>4</sub>, filtered and concentrated under reduced pressure. The residue was purified by flash chromatography on silica gel (hexanes/EtOAc: 99/1 to 90/10) to afford **13** as a colorless oil (1.36 g, 38%). <sup>1</sup>H NMR (CDCl<sub>3</sub>) δ 1.52 (br dq, *J* = 10.5 Hz, 6.6

Hz, 2H), 1.79 (t,  $J = 2.7$  Hz, 3H), 1.93 (m, 1H), 2.08–2.21 (m, 4H), 2.29–2.46 (m, 4H).  $^{13}\text{C}$  NMR ( $\text{CDCl}_3$ )  $\delta$  3.39, 24.98, 31.92, 35.80, 40.54, 76.89, 77.07, 211.90. HRMS ( $\text{EI}^+$ ) Calcd for  $\text{C}_{10}\text{H}_{14}\text{O}$   $[\text{M}]^+$ :  $m/z$  150.1045. Found:  $m/z$  150.1043.

**Methyl 5-(2-Butynyl)-2-oxocyclohexanecarboxylate (2i) (keto/enol = 0/100)**

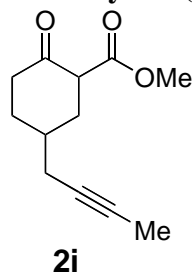

**2i** was synthesized by the reported method.<sup>11</sup> *n*-Butyl lithium (6.36 ml of 1.65 M in hexane, 10.5 mmol) was added to a stirred solution of diisopropylamine (1.48 mL, 10.5 mmol) in THF (22 ml) at  $-20$  °C under Ar atmosphere. After 30 min the temperature was lowered to  $-78$  °C, a solution of **13** (1.31 g, 8.74 mmol) in THF (9 ml) was added through a cannula-tube, and then stirring was continued at  $0$  °C for 1 h. The mixture was cooled again to  $-78$  °C, HMPA (1.55 mL, 8.73 mmol) was added, and methyl cyanoformate (0.840 mL, 10.5 mmol) was added. After stirring for 2 h, the mixture was poured into cold water (20 ml). The organic layer was washed with saturated aqueous  $\text{NH}_4\text{Cl}$  ( $3 \times 20$  mL), and separated. The combined aqueous layer was extracted with ether ( $3 \times 20$  mL). The organic layers were combined, dried over  $\text{MgSO}_4$ , filtered and concentrated under reduced pressure. Flash chromatography on silica gel (hexanes/EtOAc: 99/1 to 90/10) of the residue gave **2i** as a colorless oil (200 mg, 11%, keto/enol = 0/100).  $^1\text{H}$  NMR of **2i-enol** ( $\text{CDCl}_3$ )  $\delta$  1.42 (m, 1H), 1.70 (m, 1H), 1.80 (t,  $J = 2.7$  Hz, 3H), 1.85–1.98 (m, 2H), 2.07–2.26 (m, 2H), 2.31–2.38 (m, 2H), 2.45 (br dd,  $J = 15.3$  Hz, 4.8 Hz, 1H), 3.76 (s, 3H), 12.16 (s, 1H).  $^{13}\text{C}$  NMR of **2i-enol** ( $\text{CDCl}_3$ )  $\delta$  3.49, 25.09, 27.07, 28.24, 28.71, 33.41, 51.39, 76.84, 77.12, 96.73, 171.82, 172.94; Anal. Calcd for  $\text{C}_{12}\text{H}_{16}\text{O}_3$ : C, 69.21; H, 7.74%. Found: C, 69.27; H, 7.99%. HRMS ( $\text{EI}^+$ ) Calcd for  $\text{C}_{12}\text{H}_{16}\text{O}_3$   $[\text{M}]^+$ :  $m/z$  208.1099. Found:  $m/z$  208.1089.

**Scheme 5. Preparation of 2j.**

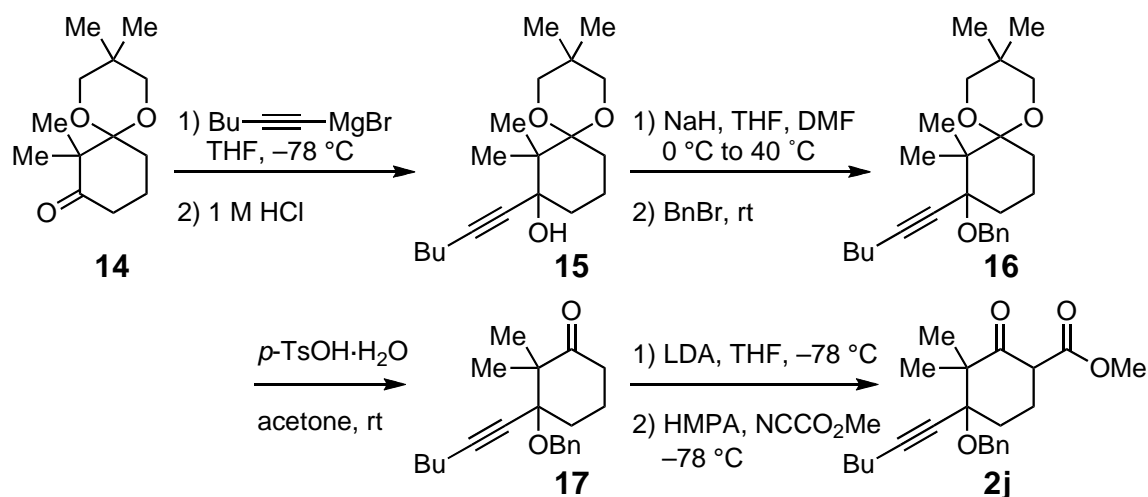

**8-(1-Hexynyl)-3,3,7,7-tetramethyl-1,5-dioxaspiro[5.5]undecan-8-ol (15)**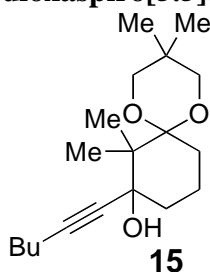

To a solution of 1-hexyne (16.2 mL, 140 mmol) in THF (40 mL) was added *n*-BuLi (87.0 mL of 1.61 M in hexane, 140 mmol) dropwise at  $-78^{\circ}\text{C}$ . After stirring for 30 min at this temperature, a solution of 3,3,7,7-tetramethyl-1,5-dioxaspiro[5.5]undecan-8-one (**14**)<sup>12</sup> (15.8 g, 69.9 mmol) and HMPA (12.4 mL, 69.8 mmol) in THF (30 mL) was added dropwise by a cannula-tube over 30 min. The resulting mixture was allowed to warm to room temperature and stirred overnight. The reaction mixture was diluted with ether and quenched with saturated aqueous  $\text{NH}_4\text{Cl}$ . The organic layer was washed with saturated aqueous  $\text{NH}_4\text{Cl}$  ( $3 \times 50$  mL), and separated. The combined aqueous layer was extracted with ether ( $3 \times 50$  mL). The organic layers were combined, dried over  $\text{MgSO}_4$ , filtered and concentrated under reduced pressure. The crude product was purified by flash chromatography on silica gel (hexanes/EtOAc: 99/1 to 90/10) to afford a 17.1 g of mixture of **15** (10.1 g, 32.8 mmol, 47%  $^1\text{H}$  NMR yield) and unreacted **14** (7.04 g, 31.1 mmol). This mixture was used in the next step without further purification.

**3-(Benzyloxy)-3-(1-hexynyl)-2,2-dimethylcyclohexanone (17)**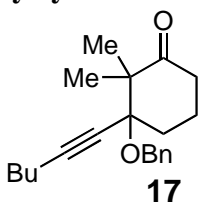

To a suspension of NaH (60 wt. %, 469 mg, 11.7 mmol) in DMF (8 mL) was added dropwise a solution of **15** (2.38 mL, 7.72 mmol) in THF (4 mL) and DMF (4 mL) at room temperature. The mixture was stirred at this temperature for 10 min and at  $40^{\circ}\text{C}$  for 1 h. The mixture was cooled to room temperature, and then benzyl chloride (1.87 mL, 15.4 mmol) was added. The resulting mixture was stirred for 1 h (monitored by TLC), diluted with ether, and quenched with saturated aqueous  $\text{NH}_4\text{Cl}$ . The organic layer was washed with saturated aqueous  $\text{NH}_4\text{Cl}$  ( $3 \times 15$  mL), and separated. The combined aqueous layer was extracted with ether ( $3 \times 15$  mL). The organic layers were combined, dried over  $\text{MgSO}_4$ , filtered and concentrated under reduced pressure. Purification by flash chromatography on silica gel (hexanes/EtOAc: 100/0 to 95/5) afforded **16** as a colorless viscous oil (1.81 g, 59%).

To a solution of **16** (5.29 g, 13.3 mmol) in acetone (130 mL) was added one portion of  $\text{TsOH} \cdot \text{H}_2\text{O}$  (3.78 g, 14.8 mmol) at room temperature. After stirring for 9 h, the reaction mixture was concentrated by rotator evaporator to remove a half of acetone, diluted with ether, and quenched with saturated aqueous  $\text{NaHCO}_3$ . The organic layer was washed with saturated aqueous  $\text{NaHCO}_3$  ( $3 \times 40$  mL), and separated. The combined aqueous layer was extracted with ether ( $3 \times 40$  mL). The organic layers were combined, dried over  $\text{MgSO}_4$ , filtered and concentrated under reduced pressure. The residue was purified by flash chromatography on silica gel (hexanes/EtOAc: 99/1 to 96/4) to afford **17** as a colorless viscous oil (3.26 g, 79%).  $^1\text{H}$  NMR ( $\text{CDCl}_3$ )  $\delta$  0.91 (t,  $J = 7.2$  Hz, 3H), 1.26 (s, 3H), 1.31 (s, 3H), 1.34–1.56 (m, 4H), 1.74–1.95 (m, 2H), 2.18 (dd,  $J = 5.1$  Hz, 8.4 Hz, 2H), 2.25 (t,  $J = 6.9$  Hz, 2H), 2.33 (dt,  $J = 15.0$  Hz, 5.1 Hz, 1H), 2.52 (ddd,  $J = 15.0$  Hz, 10.5 Hz, 7.2 Hz, 1H), 4.42 (d,  $J = 11.7$  Hz, 1H), 4.75 (d,  $J = 11.7$  Hz, 1H), 7.20–7.35 (m, 5H).  $^{13}\text{C}$  NMR ( $\text{CDCl}_3$ )  $\delta$  13.23, 17.96, 18.87, 19.66,

21.59, 23.09, 29.62, 30.47, 36.25, 53.68, 65.13, 77.80, 81.59, 88.59, 126.78, 126.89, 127.99, 139.04, 213.83. Anal. Calcd for  $C_{21}H_{28}O_2$ : C, 80.37; H, 9.03%. Found: C, 80.74; H, 9.05%. HRMS ( $EI^+$ ) Calcd for  $C_{21}H_{28}O_2$   $[M]^+$ :  $m/z$  312.2089. Found:  $m/z$  312.2089.

**Methyl 4-(Benzyloxy)-4-(1-hexynyl)-3,3-dimethyl-2-oxocyclohexanecarboxylate (2j) (keto/enol = 12/88)**

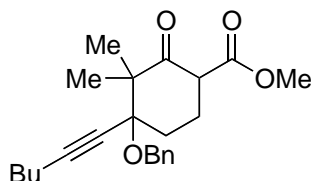

**2j**

**2j** was synthesized by the known method.<sup>11</sup> *n*-Butyl lithium (3.90 ml of 1.54M in hexane, 6.01 mmol) was added to a stirred solution of diisopropylamine (0.846 mL, 5.99 mmol) in THF (12.5 ml) at  $-20\text{ }^{\circ}\text{C}$  under Ar atmosphere. After 30 min the temperature was lowered to  $-78\text{ }^{\circ}\text{C}$ . A solution of **17** (1.58 g, 5.05 mmol) in THF (5 ml) was added through a canula-tube. Stirring was continued at  $0\text{ }^{\circ}\text{C}$  for 1 h. The mixture was cooled again to  $-78\text{ }^{\circ}\text{C}$ , HMPA (0.887 mL, 5.00 mmol) was added, and methyl cyanoformate (0.480 mL, 5.99 mmol) was added. After stirring for 20 min at  $-78\text{ }^{\circ}\text{C}$  and for 40 min at room temperature, the mixture was poured into cold water (20 ml). The organic layer was washed with saturated aqueous  $NH_4Cl$  ( $3 \times 15\text{ mL}$ ), and separated. The combined aqueous layer was extracted with ether ( $3 \times 15\text{ mL}$ ). The organic layers were combined, dried over  $MgSO_4$ , filtered and concentrated under reduced pressure. The residue was purified by flash chromatography on silica gel (hexanes/EtOAc: 99/1 to 94/6) and PTLC to afford **2j** as a colorless viscous oil (409 mg, 22%, keto/enol = 12/88).  $^1H$  NMR ( $CDCl_3$ )  $\delta$  0.89 (t,  $J = 7.2\text{ Hz}$ ,  $0.88 \times 3H$ ), 0.91 (t,  $J = 6.9\text{ Hz}$ ,  $0.12 \times 3H$ ), 1.27 (s,  $0.12 \times 3H$ ), 1.34 (s,  $0.88 \times 3H$ ), 1.35 (s,  $0.12 \times 3H$ ), 1.39 (s,  $0.88 \times 3H$ ), 1.37–1.58 (m, 4H), 1.85–2.19 (m, 2H), 2.19–2.33 (m, 4H), 3.59 (m,  $0.12 \times 1H$ ), 3.73 (s,  $0.88 \times 3H$ ), 3.74 (s,  $0.12 \times 3H$ ), 4.43 (d,  $J = 11.4\text{ Hz}$ ,  $0.12 \times 1H$ ), 4.49 (d,  $J = 11.4\text{ Hz}$ ,  $0.88 \times 1H$ ), 4.72 (d,  $J = 11.7\text{ Hz}$ ,  $0.12 \times 1H$ ), 4.84 (d,  $J = 11.4\text{ Hz}$ ,  $0.88 \times 1H$ ), 7.18–7.42 (m, 5H), 12.49 (s, 1H).  $^{13}C$  NMR of **2j-enol** ( $CDCl_3$ )  $\delta$  13.40, 18.18, 19.18, 20.44, 21.77, 24.95, 27.24, 30.68, 44.51, 51.38, 65.75, 78.28, 78.52, 88.26, 94.63, 127.07, 127.13, 128.19, 139.67, 173.40, 176.49. Anal. Calcd for  $C_{23}H_{30}O_4$ : C, 74.56; H, 8.16%. Found: C, 74.55; H, 8.17%. HRMS ( $EI^+$ ) Calcd for  $C_{23}H_{30}O_4$   $[M]^+$ :  $m/z$  370.2144. Found:  $m/z$  370.2154.

## Cyclization Products.

**Mixture of (Z)-Methyl 1-Acetyl-2-ethylidenecyclopentanecarboxylate (3a) and Methyl 1-Acetyl-2-methyl-2-cyclohexenecarboxylate (4a) (3a/4a = 80/20)**

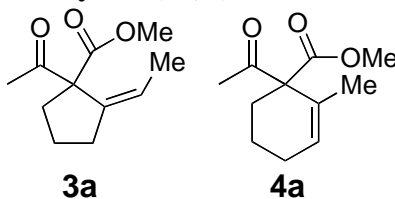

Colorless oil.  $^1H$  NMR ( $CDCl_3$ )  $\delta$  1.54–1.64 (m,  $0.20 \times 3H$ ), 1.60 (dt,  $J = 7.5\text{ Hz}$ ,  $1.8\text{ Hz}$ ,  $0.80 \times 3H$ ), 1.66–1.79 (m,  $0.80 \times 2H$ ,  $0.20 \times 2H$ ), 1.94 (m,  $0.20 \times 1H$ ), 2.03–2.15 (m,  $0.20 \times 2H$ ), 2.09 (dt,  $J = 13.2\text{ Hz}$ ,  $7.5\text{ Hz}$ ,  $0.80 \times 1H$ ), 2.19 (s,  $0.20 \times 3H$ ), 2.23 (s,  $0.80 \times 3H$ ), 2.34 (m,  $0.20 \times 1H$ ), 2.40–2.55 (m,  $0.80 \times 3H$ ), 3.75 (s,  $0.80 \times 3H$ ), 3.78 (s,  $0.20 \times 3H$ ), 5.71 (qt,  $J = 7.2\text{ Hz}$ ,  $2.1\text{ Hz}$ ,  $0.80 \times 1H$ ), 5.78 (m,  $0.20 \times 1H$ ).  $^{13}C$  NMR ( $CDCl_3$ )  $\delta$  15.28 ( $0.80 \times 1C$ ), 18.43 ( $0.20 \times 1C$ ), 21.55 ( $0.20 \times 1C$ ), 24.38 ( $0.80 \times 1C$ ), 24.90 ( $0.20 \times 1C$ ), 26.19 ( $0.80 \times 1C$ ), 26.49 ( $0.20 \times 1C$ ), 29.71 ( $0.20 \times 1C$ ), 35.03 ( $0.80 \times 1C$ ), 37.03 ( $0.80 \times 1C$ ), 52.11 ( $0.20 \times 1C$ ), 52.27 ( $0.80 \times 1C$ ), 65.45 ( $0.20 \times 1C$ ), 69.08 ( $0.80 \times 1C$ ), 123.03 ( $0.80 \times 1C$ ), 128.37

(0.20×1C), 129.62 (0.20×1C), 140.03 (0.80×1C), 172.40 (0.80×1C), 172.53 (0.20×1C), 205.24 (0.80×1C), 206.58 (0.20×1C). HRMS (EI<sup>+</sup>) Calcd for C<sub>11</sub>H<sub>16</sub>O<sub>3</sub> [M]<sup>+</sup>: *m/z* 196.1099. Found: *m/z* 196.1104.

**Mixture of (Z)-Methyl 1-Acetyl-2-pentylidenecyclopentanecarboxylate (3b) and Methyl 1-Acetyl-2-butyl-2-cyclohexenecarboxylate (4b) (3b/4b = 91/9)**

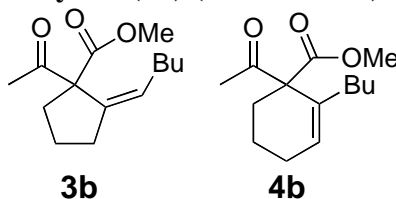

Colorless oil. <sup>1</sup>H NMR of **3b** (CDCl<sub>3</sub>) δ 0.85–0.93 (m, 3H), 1.26–1.36 (m, 4H), 1.66–1.77 (m, 2H), 1.82–2.13 (m, 3H), 2.23 (s, 3H), 2.41–2.54 (m, 3H), 3.74 (s, 3H), 5.61 (br t, *J* = 7.5 Hz, 1H) (**4b**: 2.18 (s, 3H), 3.75 (s, 3H), 5.791 (m, 1H)). <sup>13</sup>C NMR of **3b** (CDCl<sub>3</sub>) δ 13.83, 22.36, 24.35, 26.23, 29.72, 31.19, 35.06, 37.15, 52.28, 69.11, 129.04, 138.54, 172.46, 205.28. HRMS (EI<sup>+</sup>) Calcd for C<sub>14</sub>H<sub>22</sub>O<sub>3</sub> [M]<sup>+</sup>: *m/z* 238.1569. Found: *m/z* 238.1568.

**Mixture of (Z)-Methyl 1-Acetyl-2-(2-methylpropylidene)cyclopentanecarboxylate (3c) and Methyl 1-Acetyl-2-isopropyl-2-cyclohexenecarboxylate (4c) (3c/4c = 92/8)**

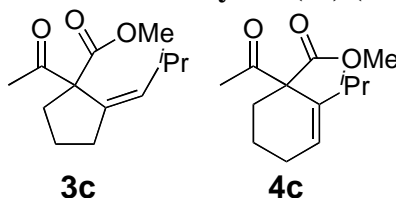

Colorless oil. <sup>1</sup>H NMR of **3c** (CDCl<sub>3</sub>) δ 0.90 (d, *J* = 6.6 Hz, 3H), 0.92 (d, *J* = 6.6 Hz, 3H), 1.66–1.79 (m, 2H), 2.05 (dt, *J* = 12.9 Hz, 7.5 Hz, 1H), 2.25 (s, 3H), 2.33 (m, 1H), 2.39–2.54 (m, 3H), 3.75 (s, 3H), 5.36 (dt, *J* = 1.8 Hz, 10.8 Hz, 1H) (**4c**: 1.00 (d, *J* = 6.6 Hz, 3H), 1.10 (d, *J* = 6.6 Hz, 3H), 2.21 (s, 3H), 3.76 (s, 3H), 5.87 (t, *J* = 3.9 Hz, 1H)). <sup>13</sup>C NMR of **3c** (CDCl<sub>3</sub>) δ 21.85, 22.12, 24.39, 26.42, 29.24, 35.18, 37.45, 52.43, 68.98, 135.86, 135.89, 172.73, 205.32. HRMS (EI<sup>+</sup>) Calcd for C<sub>13</sub>H<sub>20</sub>O<sub>3</sub> [M]<sup>+</sup>: *m/z* 224.1412. Found: *m/z* 224.1406.

**Mixture of (Z)-Methyl 1-Acetyl-2-benzylidenecyclopentanecarboxylate (3d) and Methyl 1-Acetyl-2-phenyl-2-cyclohexenecarboxylate (4d) (3d/4d = 45/55)**

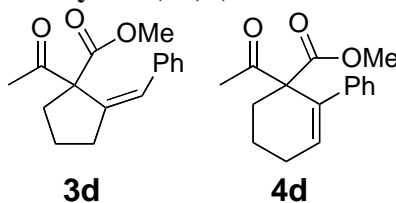

Colorless oil. <sup>1</sup>H NMR (CDCl<sub>3</sub>) δ 1.60–1.88 (m, 2H), 2.02 (s, 0.45×3H), 2.04 (s, 0.55×3H), 2.14–2.53 (m, 4H), 3.43 (s, 0.45×3H), 3.61 (s, 0.55×3H), 6.13 (t, *J* = 3.9 Hz, 0.55×1H), 6.73 (br s, 0.45×1H), 7.14–7.28 (m, 5H). All the signal observed were shown; <sup>13</sup>C NMR (CDCl<sub>3</sub>) δ 17.97, 22.96, 25.18, 26.68, 27.27, 30.75, 35.29, 38.30, 52.17 (×2C), 66.33, 70.08, 126.98, 127.05, 127.14, 127.94, 128.00, 128.12, 128.49, 131.05, 135.99, 136.68, 141.16, 142.24, 171.97, 172.78, 205.29, 206.23. HRMS (EI<sup>+</sup>) Calcd for C<sub>16</sub>H<sub>18</sub>O<sub>3</sub> [M]<sup>+</sup>: *m/z* 258.1256. Found: *m/z* 258.1256.



**Mixture of (Z)-Methyl 1-Acetyl-2-ethylidene-3,3-dimethylcyclopentanecarboxylate (3e) and Methyl 1-Acetyl-2,4,4-trimethyl-2-cyclohexenecarboxylate (4e) (3e/4e = 23/77)**

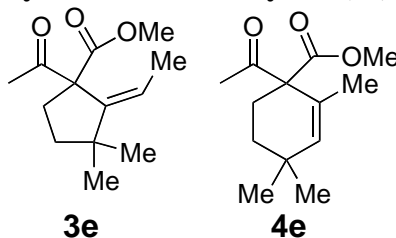

Colorless oil.  $^1\text{H}$  NMR ( $\text{CDCl}_3$ )  $\delta$  0.98 (s, 0.77 $\times$ 3H), 0.99 (s, 0.77 $\times$ 3H), 1.08 (s, 0.23 $\times$ 3H), 1.11 (s, 0.23 $\times$ 3H), 1.36–1.42 (m, 0.77 $\times$ 2H), 1.51–1.68 (m, 0.23 $\times$ 2H), 1.61 (d,  $J$  = 7.5 Hz, 0.23 $\times$ 3H), 1.73 (d,  $J$  = 1.5 Hz, 0.77 $\times$ 3H), 2.00 (m, 0.77 $\times$ 1H), 2.08 (m, 0.23 $\times$ 1H), 2.19 (s, 0.77 $\times$ 3H), 2.22 (s, 0.23 $\times$ 3H), 2.32 (m, 0.77 $\times$ 1H), 2.45 (sextet,  $J$  = 6.3 Hz, 0.23 $\times$ 1H), 3.74 (s, 0.23 $\times$ 3H), 3.76 (s, 0.77 $\times$ 3H), 5.49 (distorted q,  $J$  = 1.5 Hz, 0.77 $\times$ 1H), 5.49 (q,  $J$  = 7.2 Hz, 0.23 $\times$ 1H).  $^{13}\text{C}$  NMR ( $\text{CDCl}_3$ )  $\delta$  15.27 (0.23 $\times$ 1C), 21.50 (0.77 $\times$ 1C), 25.99 (0.23 $\times$ 1C), 26.50 (0.77 $\times$ 1C), 27.08 (0.77 $\times$ 1C), 28.74 (0.77 $\times$ 1C), 29.49 (0.23 $\times$ 1C), 29.52 (0.77 $\times$ 1C), 29.60 (0.23 $\times$ 1C), 31.89 (0.77 $\times$ 1C), 32.82 (0.23 $\times$ 1C), 33.06 (0.77 $\times$ 1C), 39.76 (0.23 $\times$ 1C), 43.76 (0.77 $\times$ 1C), 52.15 (0.77 $\times$ 1C), 52.29 (0.23 $\times$ 1C), 65.58 (0.77 $\times$ 1C), 70.71 (0.23 $\times$ 1C), 121.87 (0.23 $\times$ 1C), 127.16 (0.77 $\times$ 1C), 138.85 (0.77 $\times$ 1C), 148.70 (0.23 $\times$ 1C), 172.48 (0.77 $\times$ 1C), 172.61 (0.23 $\times$ 1C), 205.5 (0.23 $\times$ 1C), 206.49 (0.77 $\times$ 1C). HRMS ( $\text{EI}^+$ ) Calcd for  $\text{C}_{13}\text{H}_{20}\text{O}_3$  [ $\text{M}$ ] $^+$ :  $m/z$  224.1412. Found:  $m/z$  224.1415.

**Mixture of (Z)-Methyl 3-Ethylidene-4-oxooctahydropentalene-3a-carboxylate (3f) and Methyl 4-Methyl-3-oxo-2,3,3a,6,7,7a-hexahydro-1H-indene-3a-carboxylate (4f) (3f/4f = 49/51)**

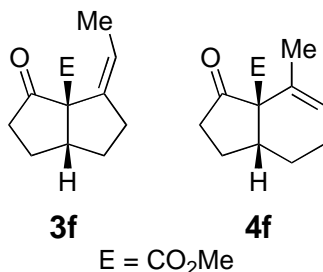

Colorless oil.  $^1\text{H}$  NMR ( $\text{CDCl}_3$ )  $\delta$  1.52 (m, 1H), 1.63–2.20 (m, 7H), 2.39–2.58 (m, 3H), 2.77 (m, 0.51 $\times$ 1H), 3.05 (quint,  $J$  = 6.6 Hz, 0.49  $\times$  1H), 3.73 (s, 3H), 5.71 (qt,  $J$  = 7.2 Hz, 1.8 Hz, 0.49 $\times$ 1H), 5.76 (m, 0.51 $\times$ 1H). All the signal observed were shown;  $^{13}\text{C}$  NMR ( $\text{CDCl}_3$ )  $\delta$  15.50, 20.07, 21.71, 21.91, 23.33, 23.74, 29.85, 33.71, 36.67, 37.61, 41.50, 51.44, 52.44, 64.22, 68.14, 123.75, 127.10, 127.80, 138.37, 172.48, 172.52, 212.71, 213.00. Anal. Calcd for  $\text{C}_{12}\text{H}_{16}\text{O}_3$ : C, 69.21; H, 7.74%. Found: C, 69.02; H, 7.69%. HRMS ( $\text{EI}^+$ ) Calcd for  $\text{C}_{12}\text{H}_{16}\text{O}_3$  [ $\text{M}$ ] $^+$ :  $m/z$  208.1099. Found:  $m/z$  208.1103.

**Mixture of (Z)-Ethyl 3-Ethylidene-4-oxooctahydro-1H-indene-3a-carboxylate (3g) and Ethyl 5-Methyl-4-oxo-1,2,3,4,4a,7,8,8a-octahydronaphthalene-4a-carboxylate (4g) (3g/4g = 67/33)**

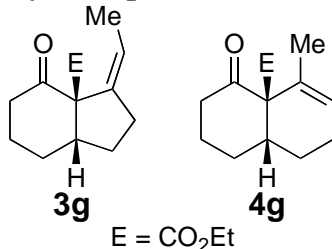

Colorless oil.  $^1\text{H}$  NMR ( $\text{CDCl}_3$ )  $\delta$  1.28 (t,  $J$  = 7.2 Hz, 0.67 $\times$ 3H), 1.29 (t,  $J$  = 7.2 Hz, 0.33 $\times$ 3H), 1.37–2.78 (m, 13H, 0.33 $\times$ 1H), 3.01 (quint,  $J$  = 6.6 Hz, 0.67 $\times$ 1H), 4.15–4.33 (m, 2H), 5.69 (aprox. qt,  $J$  = 7.2 Hz, 2.1 Hz, 0.67 $\times$ 1H), 5.71 (m, 0.33 $\times$ 1H). All the signal observed were shown;  $^{13}\text{C}$  NMR of **3g**

(CDCl<sub>3</sub>)  $\delta$  13.94, 13.96, 14.15, 21.28, 23.31, 23.45, 23.80, 24.18, 25.76, 27.07, 28.27, 31.63, 40.05, 40.23, 40.33, 50.50, 61.16, 61.32, 66.59, 69.90, 123.26, 126.09, 129.52, 139.39, 172.38, 172.40, 207.89, 208.98. Anal. Calcd for C<sub>14</sub>H<sub>20</sub>O<sub>3</sub>: C, 71.16; H, 8.53%. Found: C, 69.78; H, 8.44%. HRMS (EI<sup>+</sup>) Calcd for C<sub>14</sub>H<sub>20</sub>O<sub>3</sub> [M]<sup>+</sup>:  $m/z$  238.1569. Found:  $m/z$  236.1409.

**Mixture of (Z)-Methyl 2-Acetyl-1-pentylidene-2,3-dihydro-1H-indene-2-carboxylate (3h) and Methyl 2-Acetyl-3-butyl-1,2-dihydronaphthalene-2-carboxylate (4h) (3h/4h = 63/37)**

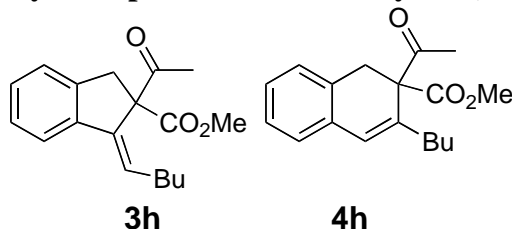

Colorless oil. <sup>1</sup>H NMR (CDCl<sub>3</sub>)  $\delta$  0.93 (t,  $J$  = 7.2 Hz, 0.63×3H), 0.97 (t,  $J$  = 7.5 Hz, 0.37×3H), 1.31–1.51 (m, 3H), 1.55–1.66 (m, 1H), 2.07–2.33 (m, 2H), 2.19 (s, 0.37×3H), 2.21 (s, 0.63×3H), 3.41 (td,  $J$  = 19.5 Hz, 15.9 Hz, 0.63×2H), 3.73 (t,  $J$  = 16.3 Hz, 0.37×2H), 3.74 (s, 0.37×3H), 3.75 (s, 0.37×3H), 6.29 (t,  $J$  = 7.8 Hz, 0.63×1H), 6.48 (m, 0.37×1H), 7.01–7.45 (m, 4H). All the signal observed were shown; <sup>13</sup>C NMR of **3h** (CDCl<sub>3</sub>)  $\delta$  13.89, 22.49, 25.69, 27.93, 29.47, 29.80, 31.33, 33.25, 35.67, 39.94, 52.45, 52.59, 64.95, 69.44, 120.19, 124.90, 125.55, 126.02, 127.13, 127.28, 127.32, 127.37, 127.79, 128.22, 131.66, 132.91, 137.72, 138.15, 140.43, 140.62, 171.72, 172.32, 203.81, 205.25. HRMS (EI<sup>+</sup>) Calcd for C<sub>18</sub>H<sub>22</sub>O<sub>3</sub> [M]<sup>+</sup>:  $m/z$  286.1569. Found:  $m/z$  286.1564.

**Methyl 2-Methyl-8-oxo-2-bicyclo[3.3.1]nonene-1-carboxylate (4i)**

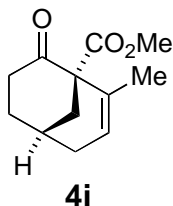

Colorless oil. <sup>1</sup>H NMR (CDCl<sub>3</sub>)  $\delta$  1.77 (m, 3H), 1.87 (m, 1H), 2.00–2.20 (m, 3H), 2.24–2.37 (m, 3H), 2.51–2.72 (m, 2H), 2.75 (s, 3H), 5.81 (br s, 1H). <sup>13</sup>C NMR (CDCl<sub>3</sub>)  $\delta$  19.86, 24.69, 31.49, 31.74, 34.12, 35.93, 51.96, 61.77, 129.72, 132.17, 171.82, 205.13. Anal. Calcd for C<sub>12</sub>H<sub>16</sub>O<sub>3</sub>: C, 69.21; H, 7.74%. Found: C, 69.27; H, 7.99%. HRMS (EI<sup>+</sup>) Calcd for C<sub>12</sub>H<sub>16</sub>O<sub>3</sub> [M]<sup>+</sup>:  $m/z$  208.1099. Found:  $m/z$  208.1090.

**Methyl 4-(Benzyloxy)-2-butyl-5,5-dimethyl-6-oxo-2-bicyclo[2.2.2]octene-1-carboxylate (4j)**

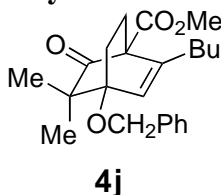

Colorless oil. <sup>1</sup>H NMR (CDCl<sub>3</sub>)  $\delta$  0.89 (br t,  $J$  = 6.9 Hz, 3H), 1.17 (s, 3H), 1.18 (s, 3H), 1.23–1.40 (m, 4H), 1.80–1.95 (m, 2H), 1.95–2.10 (m, 2H), 2.17–2.36 (m, 2H), 3.83 (s, 3H), 4.67 (q,  $J$  = 11.7 Hz, 2H), 6.29 (br s, 1H), 7.24–7.43 (m, 5H). <sup>13</sup>C NMR (CDCl<sub>3</sub>)  $\delta$  13.76, 20.81, 22.29, 23.83, 24.27, 24.77, 29.76, 32.01, 49.17, 52.01, 63.03, 65.06, 81.44, 126.62, 127.32, 128.39, 131.84, 136.69, 139.48, 170.46, 209.63. HRMS (EI<sup>+</sup>) Calcd for C<sub>23</sub>H<sub>30</sub>O<sub>4</sub> [M]<sup>+</sup>:  $m/z$  370.2144. Found:  $m/z$  370.2140.

## Reference

- 1) Ochida, A.; Ito, H.; Sawamura, M. *J. Am. Chem. Soc.* **2006**, *128*, 16486–16487.
- 2) Williams, D. B.; Stoll, M. E.; Scott, B. L.; Costa, D. A.; Oldham, W. J. Jr. *Chem. Commun.* **2005**, 1438–1440.
- 3) Fisher, M. J.; Overman, L. E. *J. Org. Chem.* **1990**, *55*, 1447–1459.
- 4) McMurry, J. E.; Matz, J. R.; Kees, K. L. *Tetrahedron* **1987**, *43*, 5489–5498.
- 5) Yoshida, Y.; Sakakura, Y.; Aso, N.; Okada, S.; Tanabe, Y. *Tetrahedron* **1999**, *55*, 2183–2192.
- 6) Wang, C.; Gu, X.; Yu, M. S.; Curran, D. P. *Tetrahedron* **1998**, *54*, 8355–8370.
- 7) (a) Horiguchi, Y.; Matsuzawa, S.; Nakamura, E.; Kuwajima, I. *Tetrahedron Lett.* **1986**, *27*, 4025–4028. (b) Renaud, J.-L.; Petit, M.; Aubert, C.; Malacria, M. *Synlett* **1997**, 931–932.
- 8) Liotta, D.; Barnum, C.; Puleo, R.; Zima, G.; Bayer, C.; Kezar, H. S. *J. Org. Chem.* **1981**, *46*, 2920–2923.
- 9) Bi, H.-P.; Guo, L.-N.; Duan, X.-H.; Gou, F.-R.; Huang, S.-H.; Liu, X.-Y.; Liang, Y.-M. *Org. Lett.* **2007**, *9*, 397–400.
- 10) Fagnoni, M.; Schmoldt, P.; Kirschberg, T.; Mattay, J. P. *Tetrahedron* **1998**, *54*, 6427–6444.
- 11) Mander, L. N.; Sethi, S. P. *Tetrahedron Lett.* **1983**, *24*, 5425–5428.
- 12) Törmäkangas, O. P.; Toivola, R. J.; Karvinen, E. K.; Koskinen, A. M. *Tetrahedron* **2002**, *58*, 2175–2181.

File C:\DOCUMENTS AND SETTINGS\北海道大学\NMR データ 06Q14\8HIDBTOWHD-1\HID-1-51C-PUREPURE.FID\FID.ALS  
 Original File:  
 Date Sep 20 06  
 Comment  
 STANDARD 1H OBSERVE

ObsNuc 1H  
 ExMode NON  
 ObsFreq 299.96 MHz  
 ObsSet -1.0 kHz  
 ObsFine 995.0047 Hz  
 Point 16384  
 Frequency (Span) 4500.45 Hz  
 Scan 16  
 AcqTime 3.4983 s  
 FD 1.502 s  
 Pulse 6.0  $\mu$ s  
 Temperature 29.0  $^{\circ}$ C  
 Solvent CDCl<sub>3</sub>  
 Reference 0.0 ppm  
 Broad.Factor 0.1373 Hz  
 SGain 6  
 Printed 2008/Aug/18 10:24:00  
 Operator

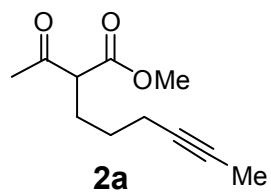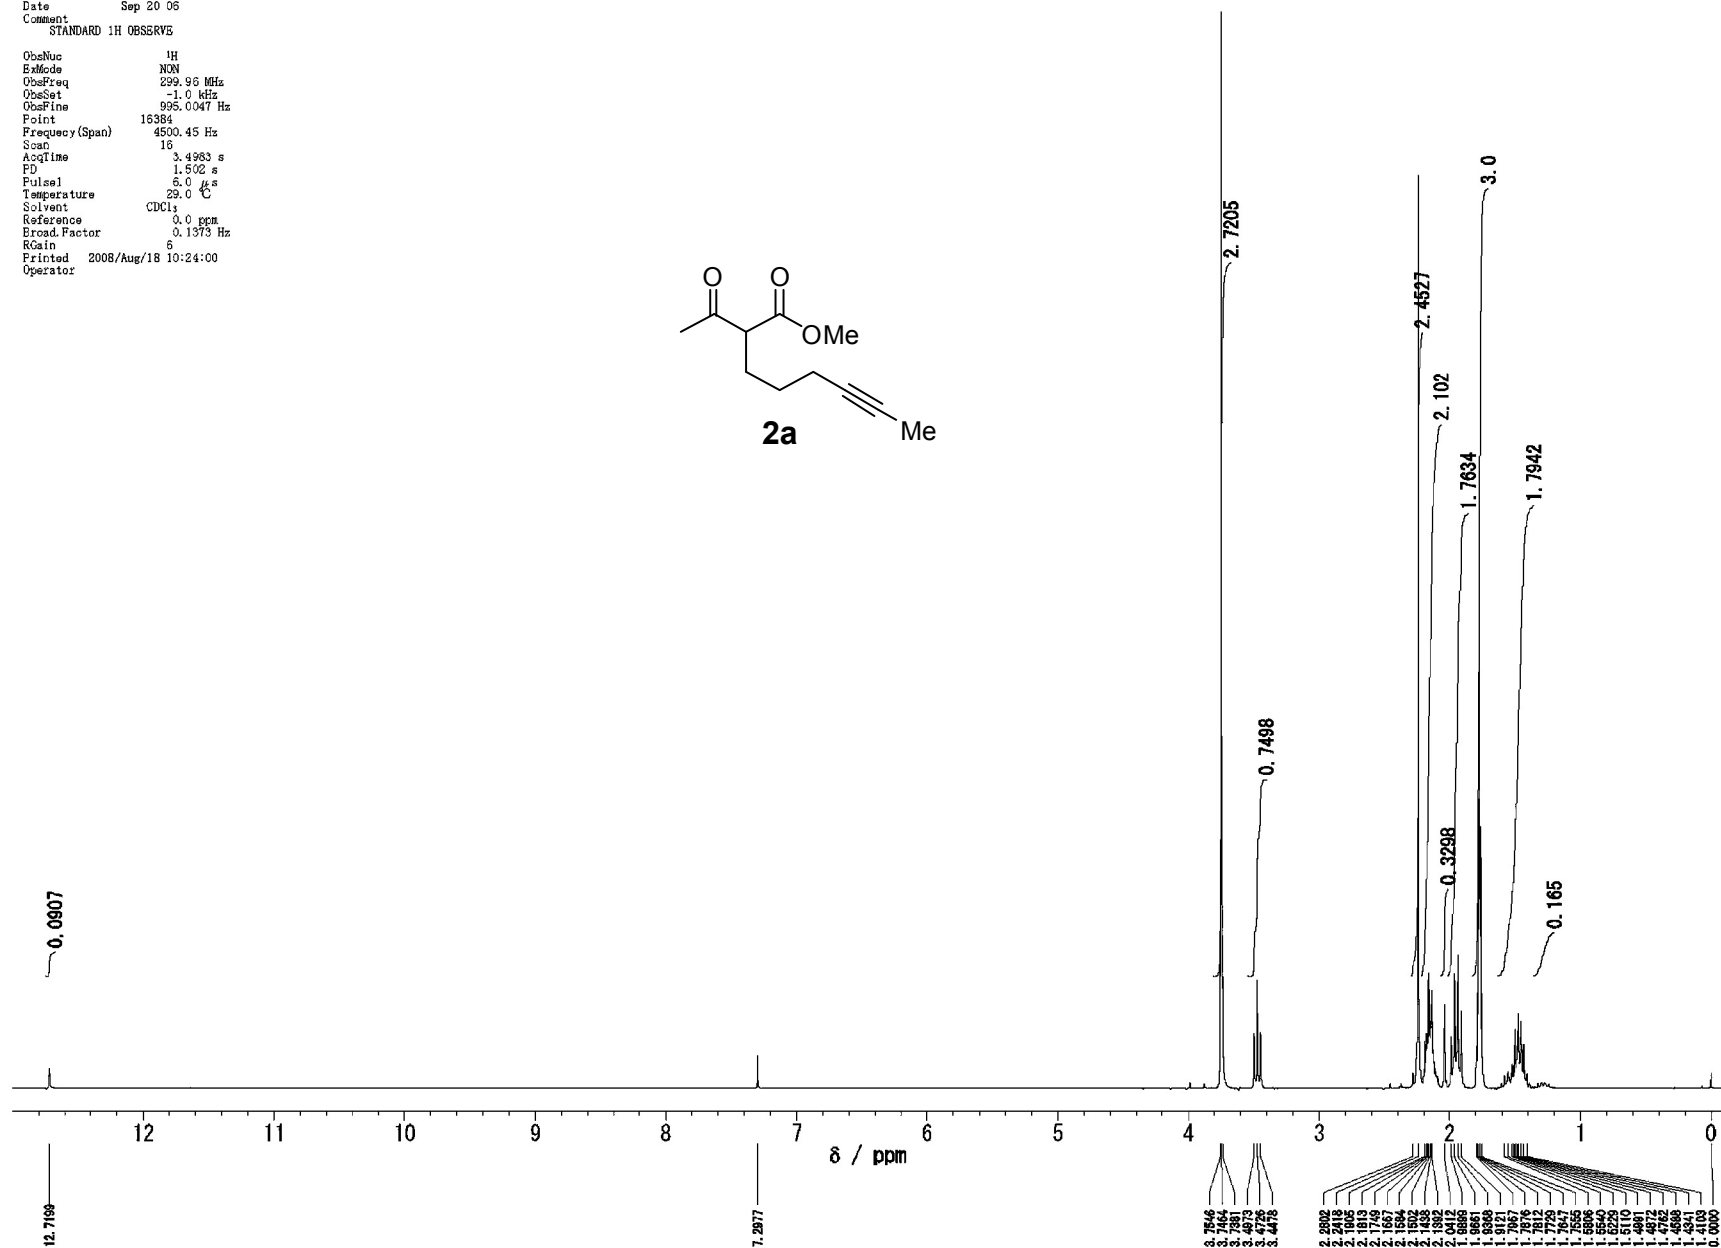

File C:\DOCUMENTS AND SETTINGS\北海道大学\MY DOCUMENTS\DELL NMR データ 06Q1Y\HIDETOWHID-1\HID-1-51D-13C.FID\FID.ALS  
 Original File:  
 Date Sep 20 06  
 Comment  
 C13 Statdard Observe  
 Stick=none Tune=6.4 Match=0.4

ObsNuc <sup>13</sup>C  
 ExMode NON  
 ObsFreq 75.43 MHz  
 ObsSet -1.0 kHz  
 ObsPine 996.3672 Hz  
 Point 32768  
 Frequency (Span) 18761.73 Hz  
 Scan 13632  
 AcqTime 1.4992 s  
 PD 1.501 s  
 Pulse1 6.0  $\mu$ s  
 Temperature 29.0  $^{\circ}$ C  
 Solvent CDCl<sub>3</sub>  
 Reference 77.0 ppm  
 Broad.Factor 0.2863 Hz  
 RGain 30  
 Printed 2008/Aug/18 10:22:43  
 Operator

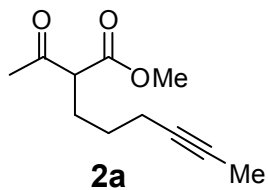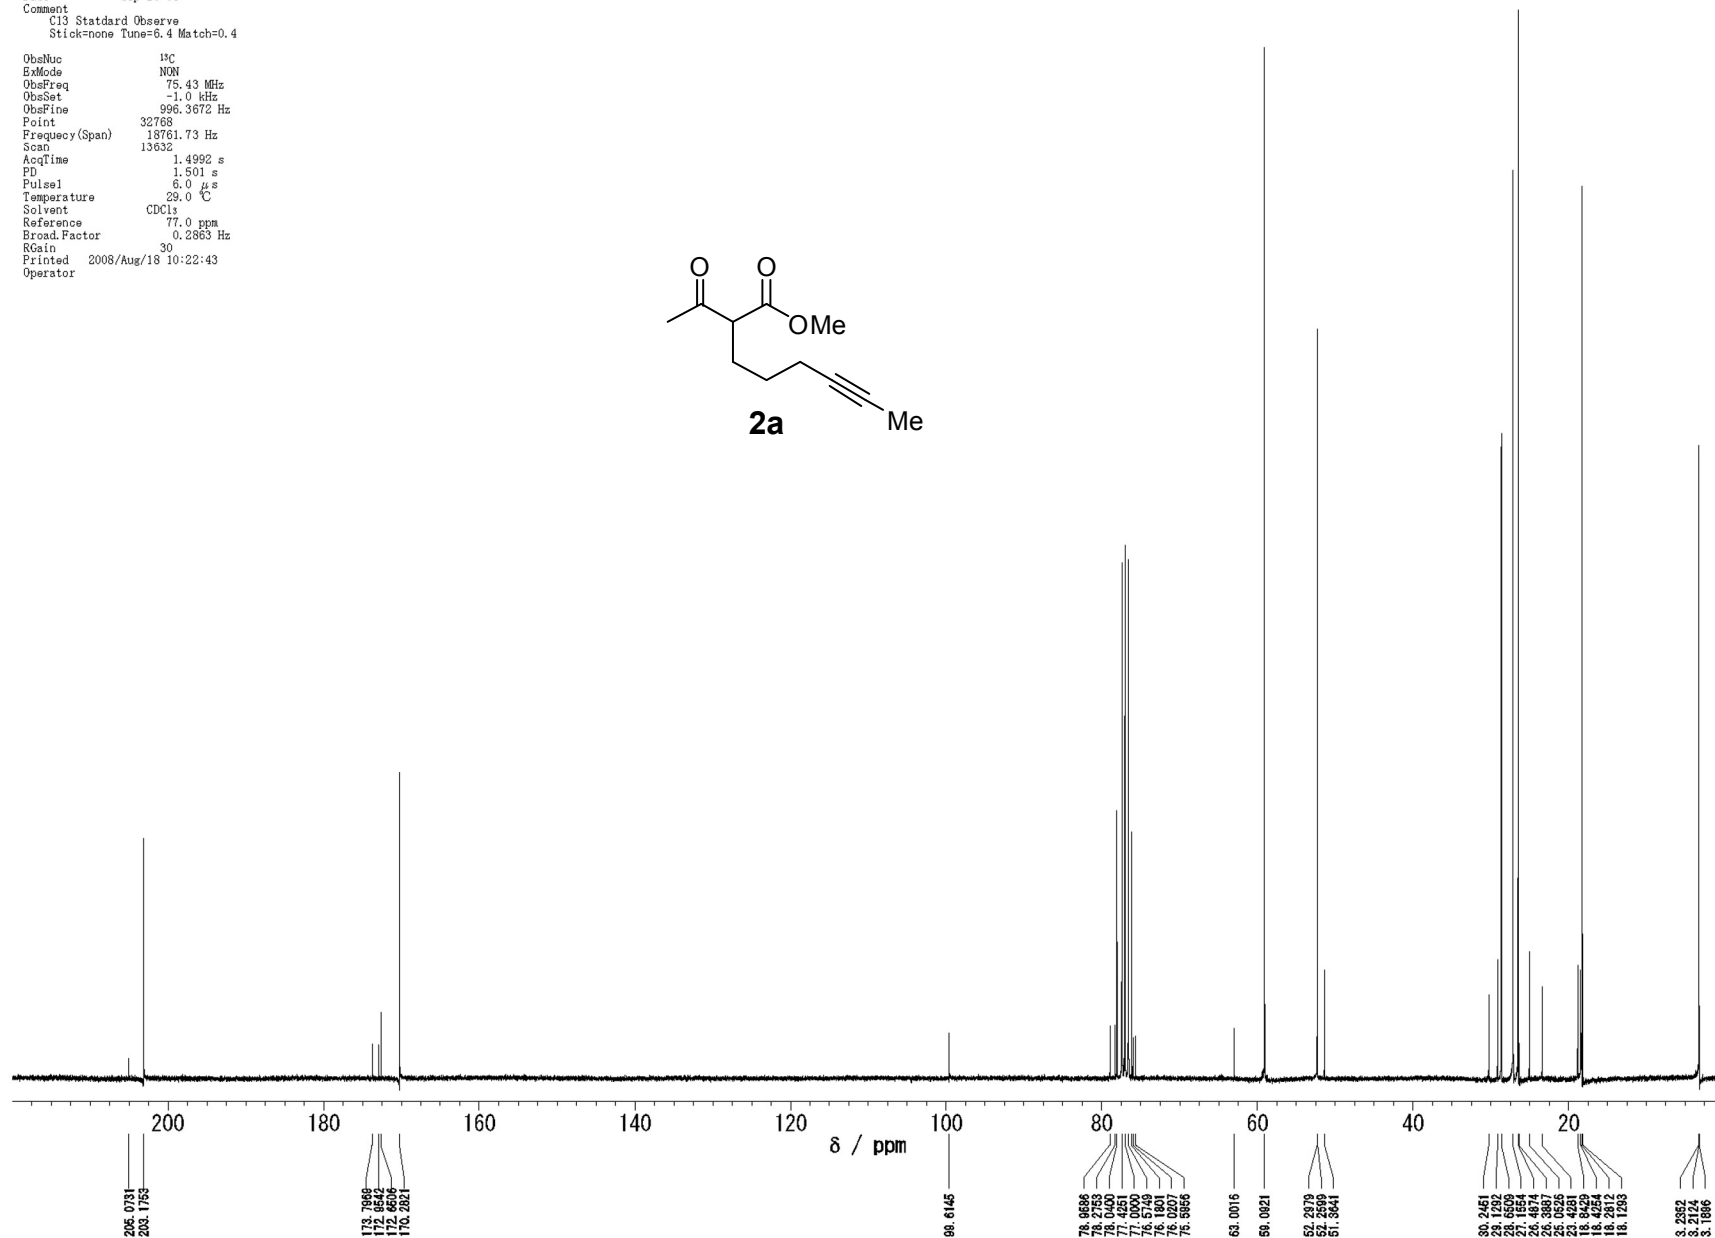

File C:\DOCUMENTS AND SETTINGS\北海道大学\MY DOCUMENTS\DELL NMR データ 06Q14\8HIDBTOWHID-1\HID-1-57B-F-G-2-MAJORPRODUCT.FID\FID.ALS

Original File:

Date Sep 27 06

Comment

STANDARD 1H OBSERVE

ObsNuc 1H  
ExMode NON  
ObsFreq 299.96 MHz  
ObsSet -1.0 kHz  
ObsFine 995.0047 Hz  
Point 16384  
Frequency (Span) 4500.45 Hz  
Scan 16  
AcqTime 3.4983 s  
FD 1.502 s  
Pulse1 6.0  $\mu$ s  
Temperature 29.0  $^{\circ}$ C  
Solvent CDCl<sub>3</sub>  
Reference 0.0 ppm  
Broad.Factor 0.1373 Hz  
RGain 30  
Printed 2008/Aug/18 10:27:42  
Operator

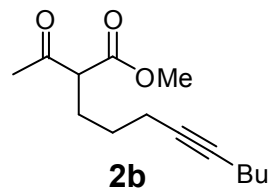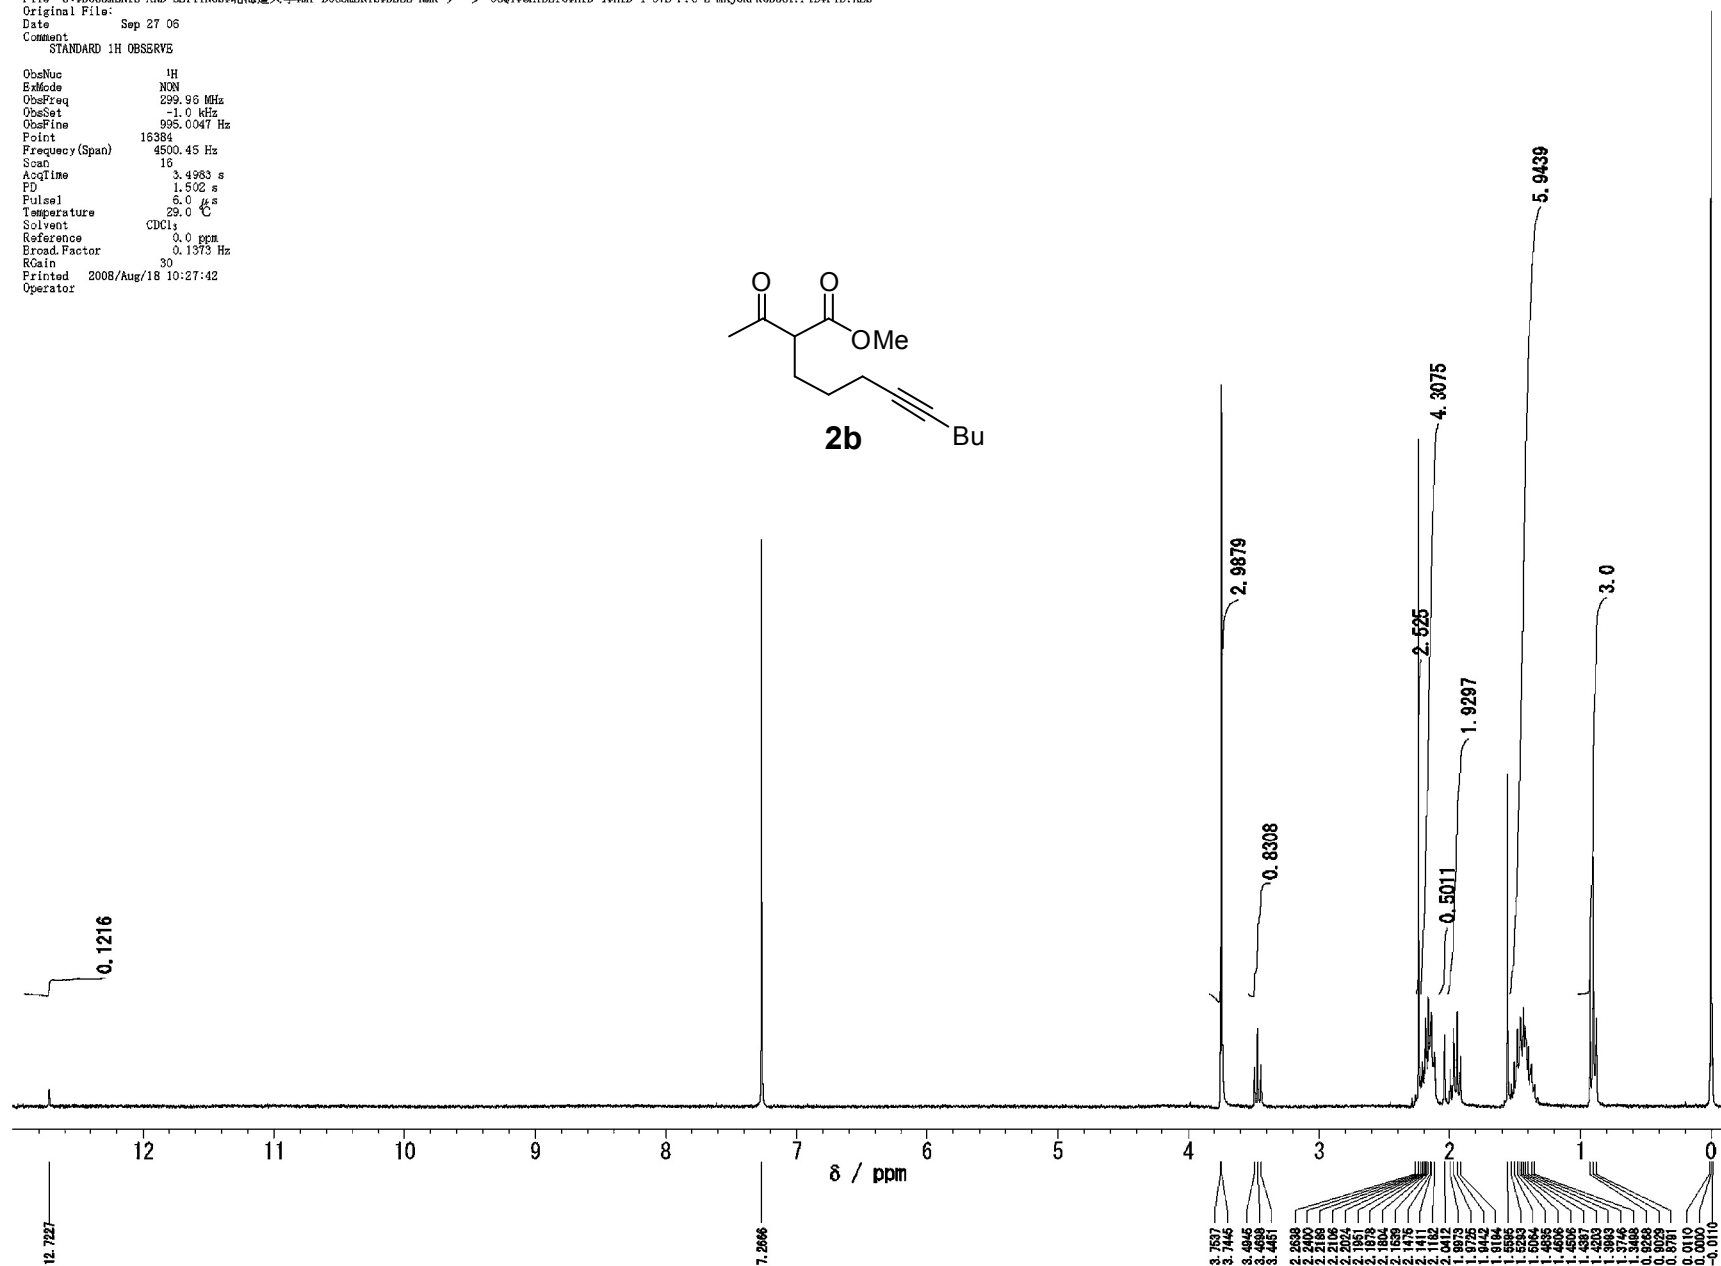

File C:\DOCUMENTS AND SETTINGS\北海道大学\MY DOCUMENTS\DELL NMR データ 06Q1V\HIDBTOWHID-1-57C-13C.FID\FID.ALS  
 Original File: C:\DOCUMENTS AND SETTINGS\北海道大学\MY DOCUMENTS\DELL NMR データ 06Q1V\HIDBTOWHID-1-57C-13C.FID\FID  
 Date Aug 26 08

Comment  
 C13 Standard Observe  
 Stick=none Tune=6.4 Match=0.4

ObsNuc <sup>13</sup>C  
 ExMode NON  
 ObsFreq 75.43 MHz  
 ObsSet -1.0 kHz  
 ObsPine 996.3672 Hz  
 Point 32768  
 Frequency (Span) 18761.73 Hz  
 Scan 14080  
 AcqTime 1.4992 s  
 PD 1.501 s  
 Pulse1 6.0 μs  
 Temperature 29.0 °C  
 Solvent CDCl<sub>3</sub>  
 Reference 77.0 ppm  
 Broad.Factor 0.25 Hz  
 RGain 30  
 Printed 2008/Aug/27 09:42:05  
 Operator

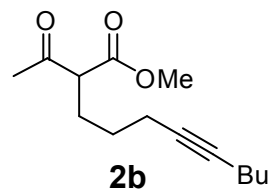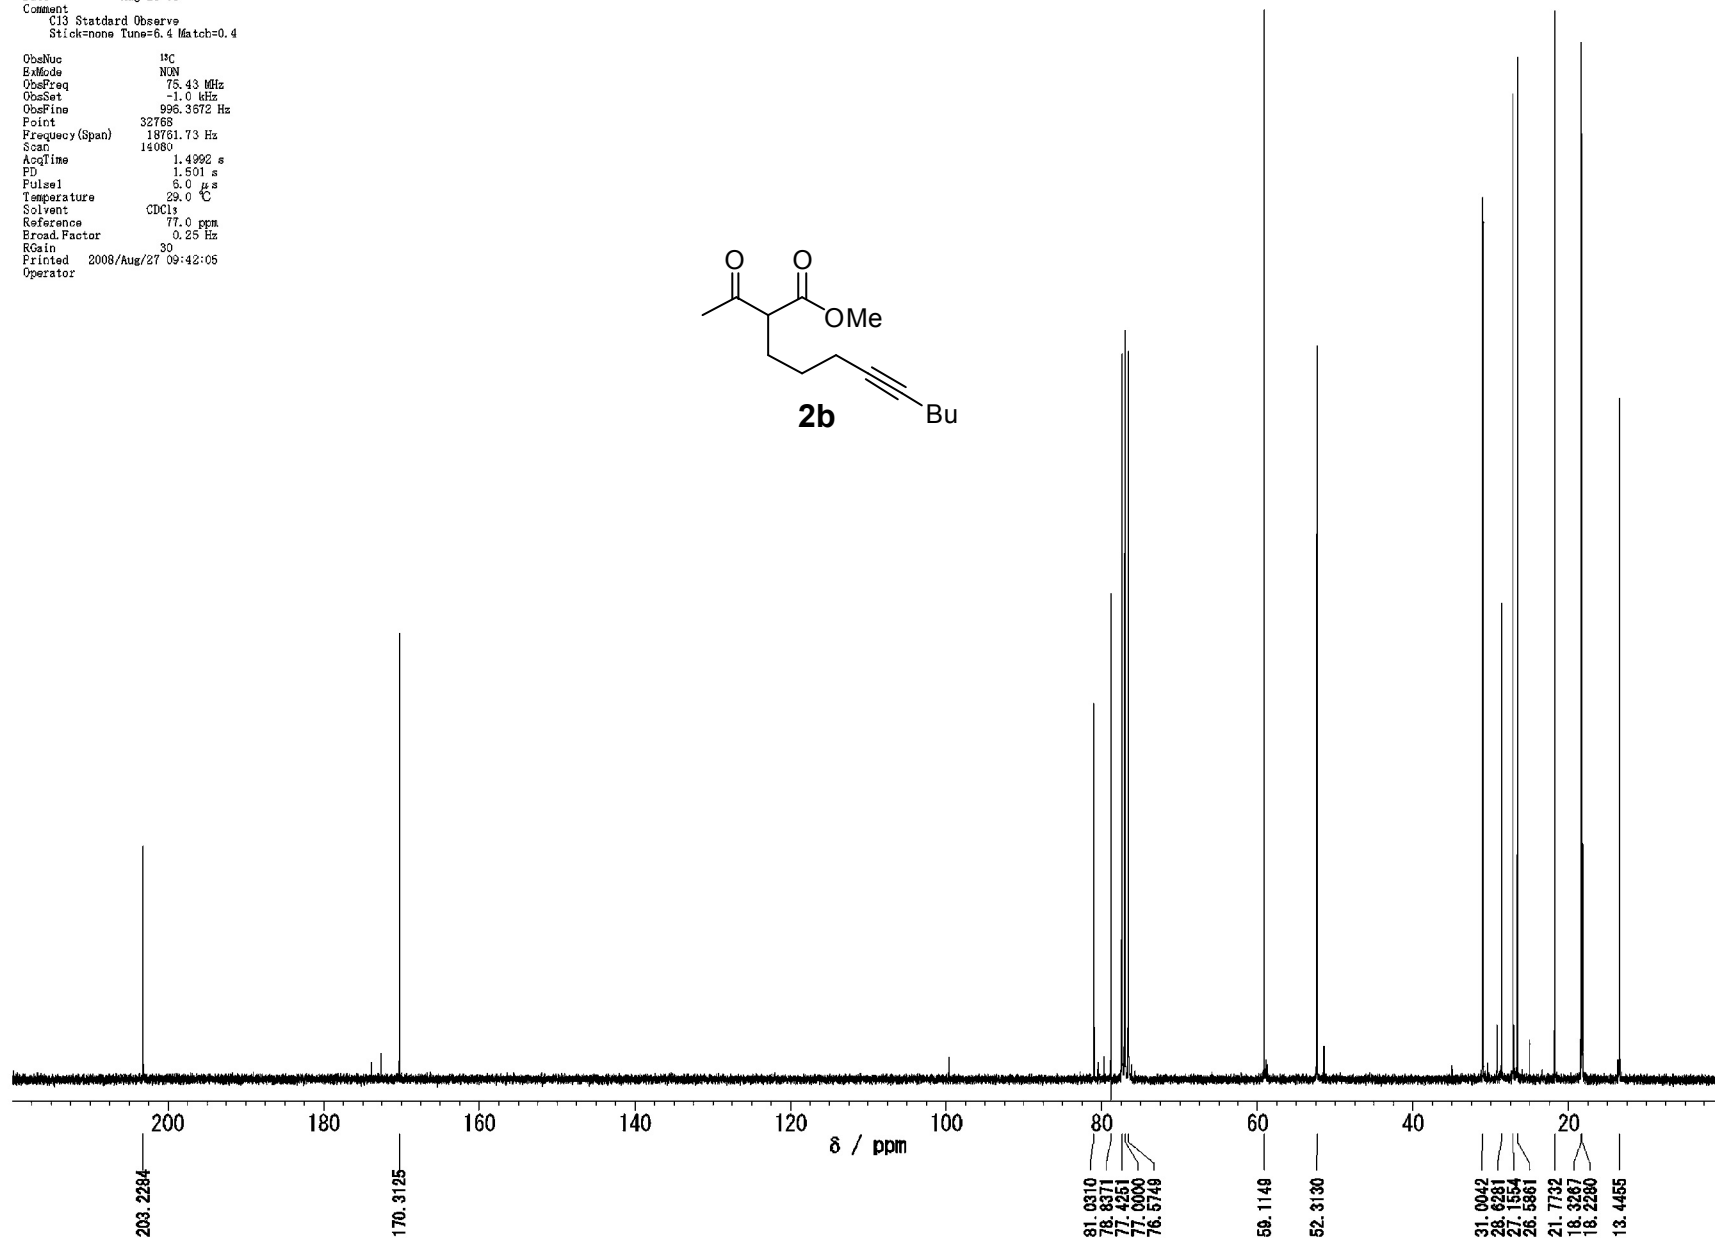

File C:\DOCUMENTS AND SETTINGS\北海道大学\NMR\DOCUMENTS\DELL NMR データ 06Q1\VMCKE\101-200\101-120\101-117\101-117-B.FID\FID.CHID(ETO).ALS  
 Original File:  
 Date Feb 5 08  
 Comment STANDARD 1H OBSERVE

ObsNuc 1H  
 ExMode NON  
 ObsFreq 299.96 MHz  
 ObsSet -1.0 kHz  
 ObsFine 995.0047 Hz  
 Point 16384  
 Frequency (Span) 4500.45 Hz  
 Scan 16  
 AcqTime 3.4983 s  
 FD 1.502 s  
 Pulse 6.0  $\mu$ s  
 Temperature 29.0  $^{\circ}$ C  
 Solvent CDCl<sub>3</sub>  
 Reference 0.0 ppm  
 Broad.Factor 0.1373 Hz  
 SGain 18  
 Printed 2008/Sep/02 18:34:29  
 Operator

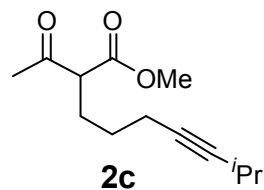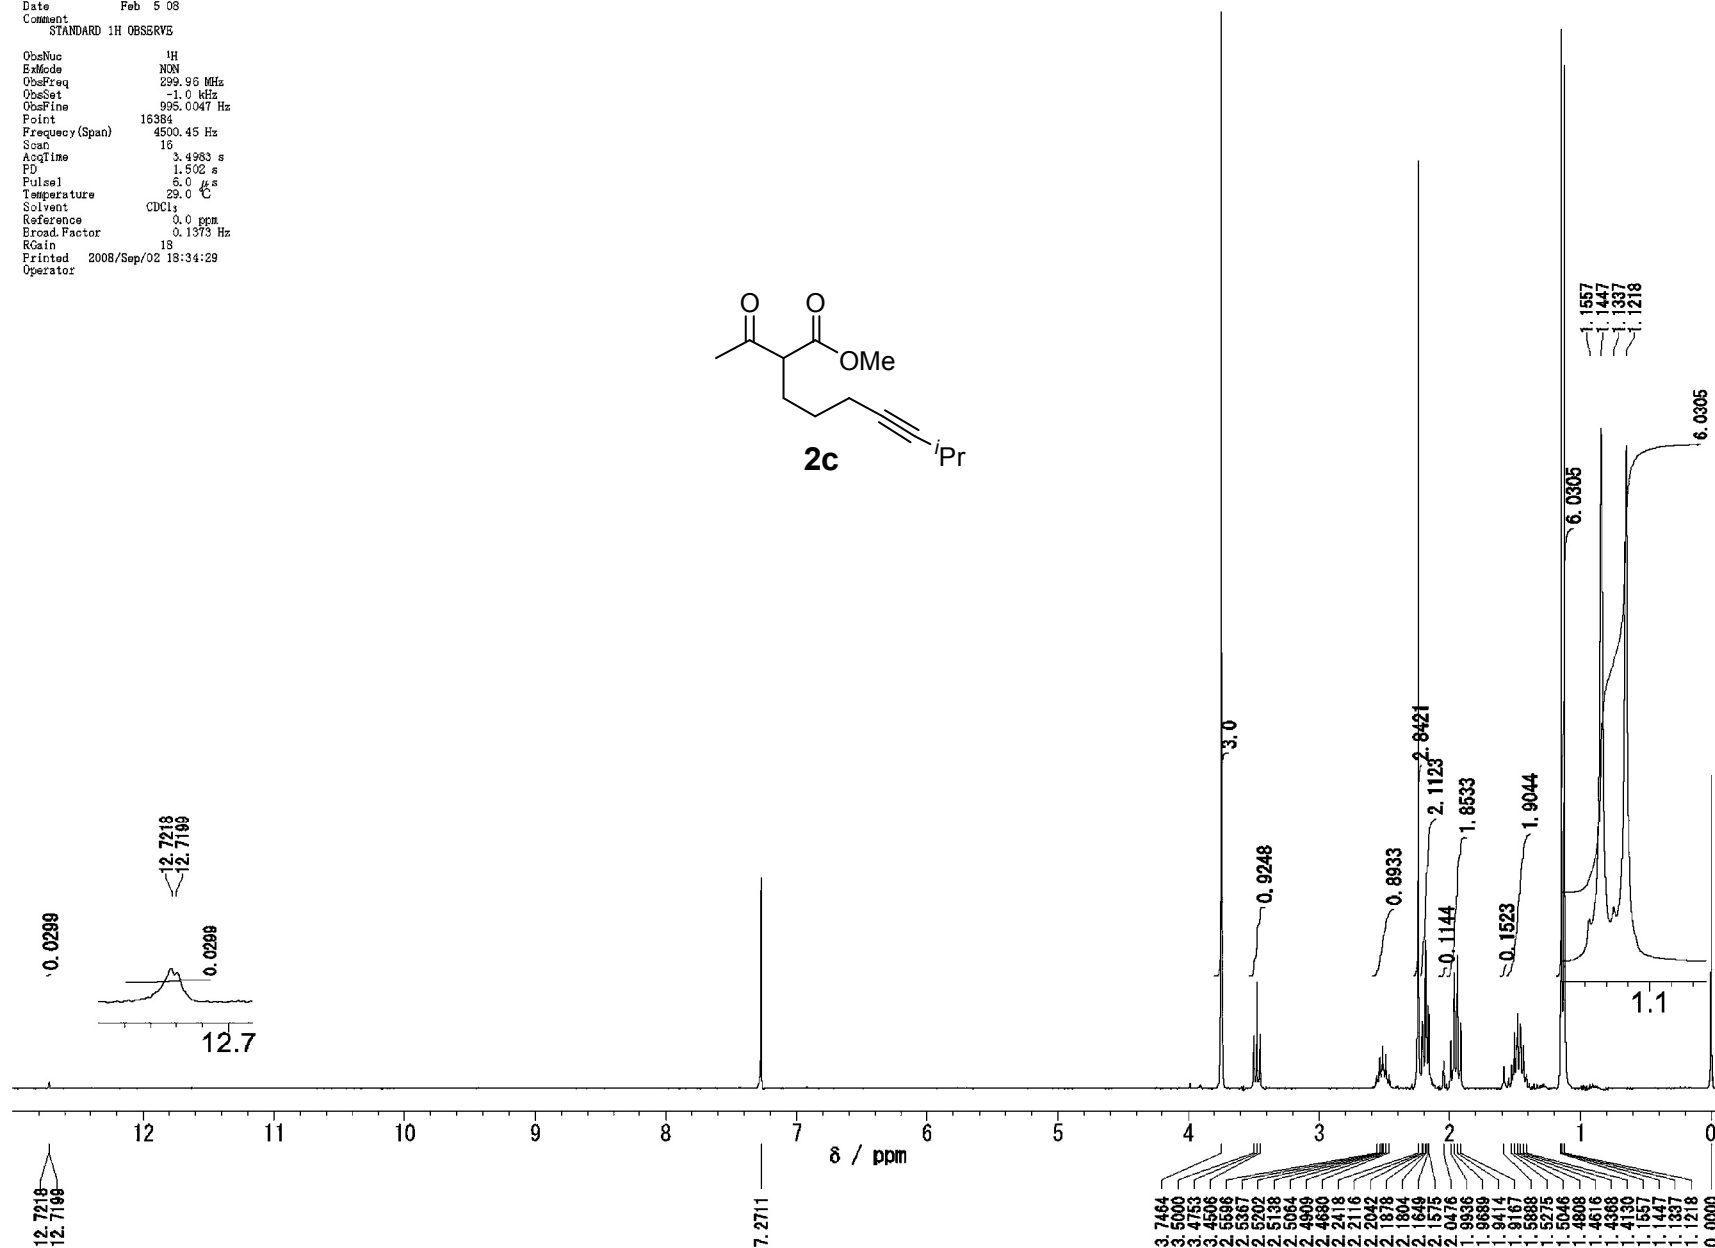



File C:\DOCUMENTS AND SETTINGS\北海道大学\NMR データ 06Q1\WICKB\101-200\101-120\101-117\101-117-D-C.FID\FID(HIDETO).ALS  
 Original File:  
 Date Jan 26 08  
 Comment  
 C13 Standard Observe  
 Stick:none Tune=6.4 Match=0.4

ObsNuc <sup>13</sup>C  
 ExMode NON  
 ObsFreq 75.43 MHz  
 ObsSet -1.0 kHz  
 ObsPine 996.3672 Hz  
 Point 32768  
 Frequency (Span) 18761.73 Hz  
 Scan 14464  
 AcqTime 1.4992 s  
 PD 1.501 s  
 Pulse1 6.0  $\mu$ s  
 Temperature 29.0  $^{\circ}$ C  
 Solvent CDCl<sub>3</sub>  
 Reference 77.0 ppm  
 Broad.Factor 0.2363 Hz  
 RGain 30  
 Printed 2008/Sep/02 18:38:30  
 Operator

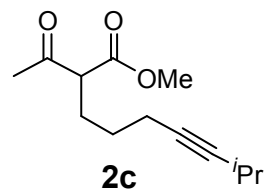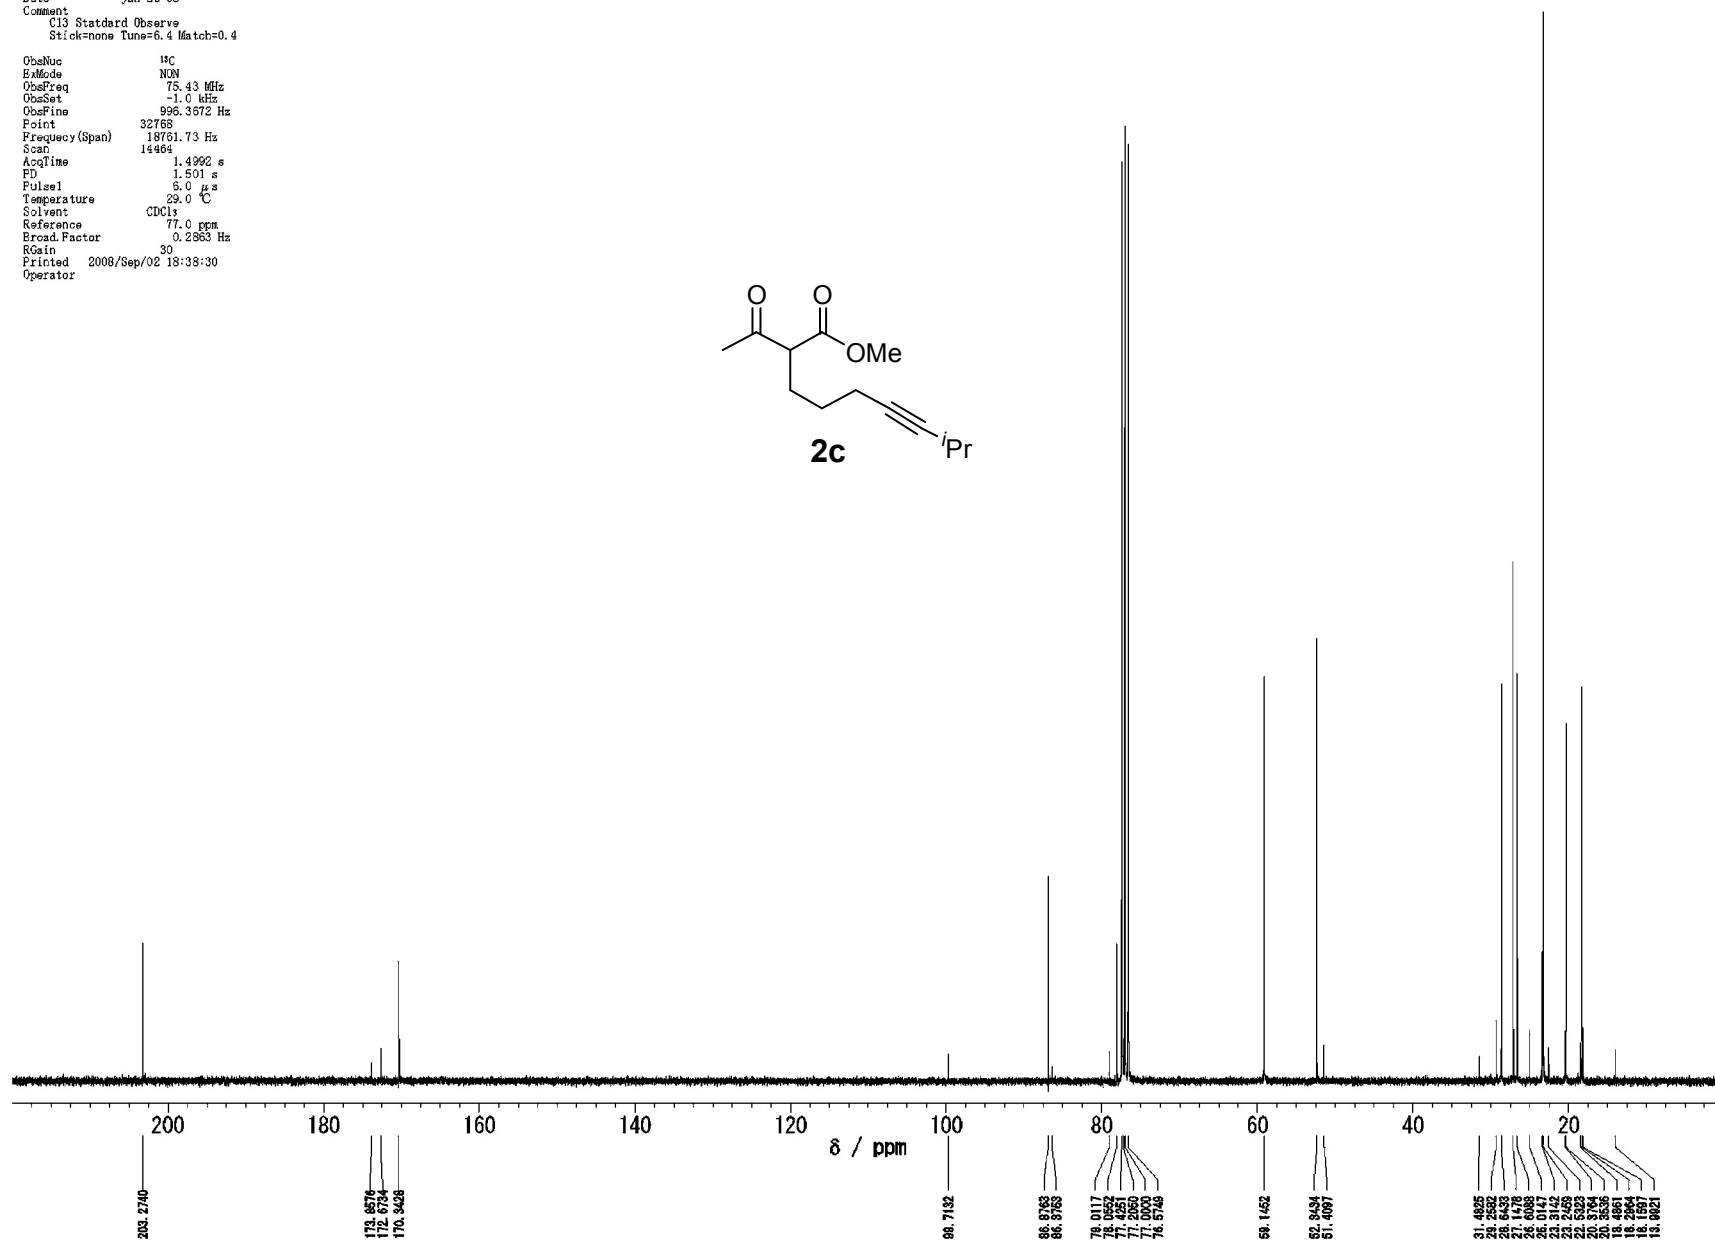

File C:\DOCUMENTS AND SETTINGS\北海道大学\MY DOCUMENTS\WDELL NMR データ 05Q1V6H1DBTOWHID-2VHID-2-77B-F.G.1.FID\VFID.ALS

Original File:  
Date Mar 20 07

Comment  
STANDARD 1H OBSERVE

ObsNuc 1H  
ExpMode NON  
ObsFreq 299.96 MHz  
ObsSet -1.0 kHz  
ObsPine 995.0047 Hz  
Point 16384  
Frequency(Span) 4500.45 Hz  
Scan 32  
AcqTime 3.4983 s  
PD 1.502 s  
Pulse1 5.0  $\mu$ s  
Temperature 29.0  $^{\circ}$ C  
Solvent CDCl<sub>3</sub>  
Reference 0.0 ppm  
Broad.Factor 0.1373 Hz  
RGain 18  
Printed 2008/Aug/19 10:32:09  
Operator

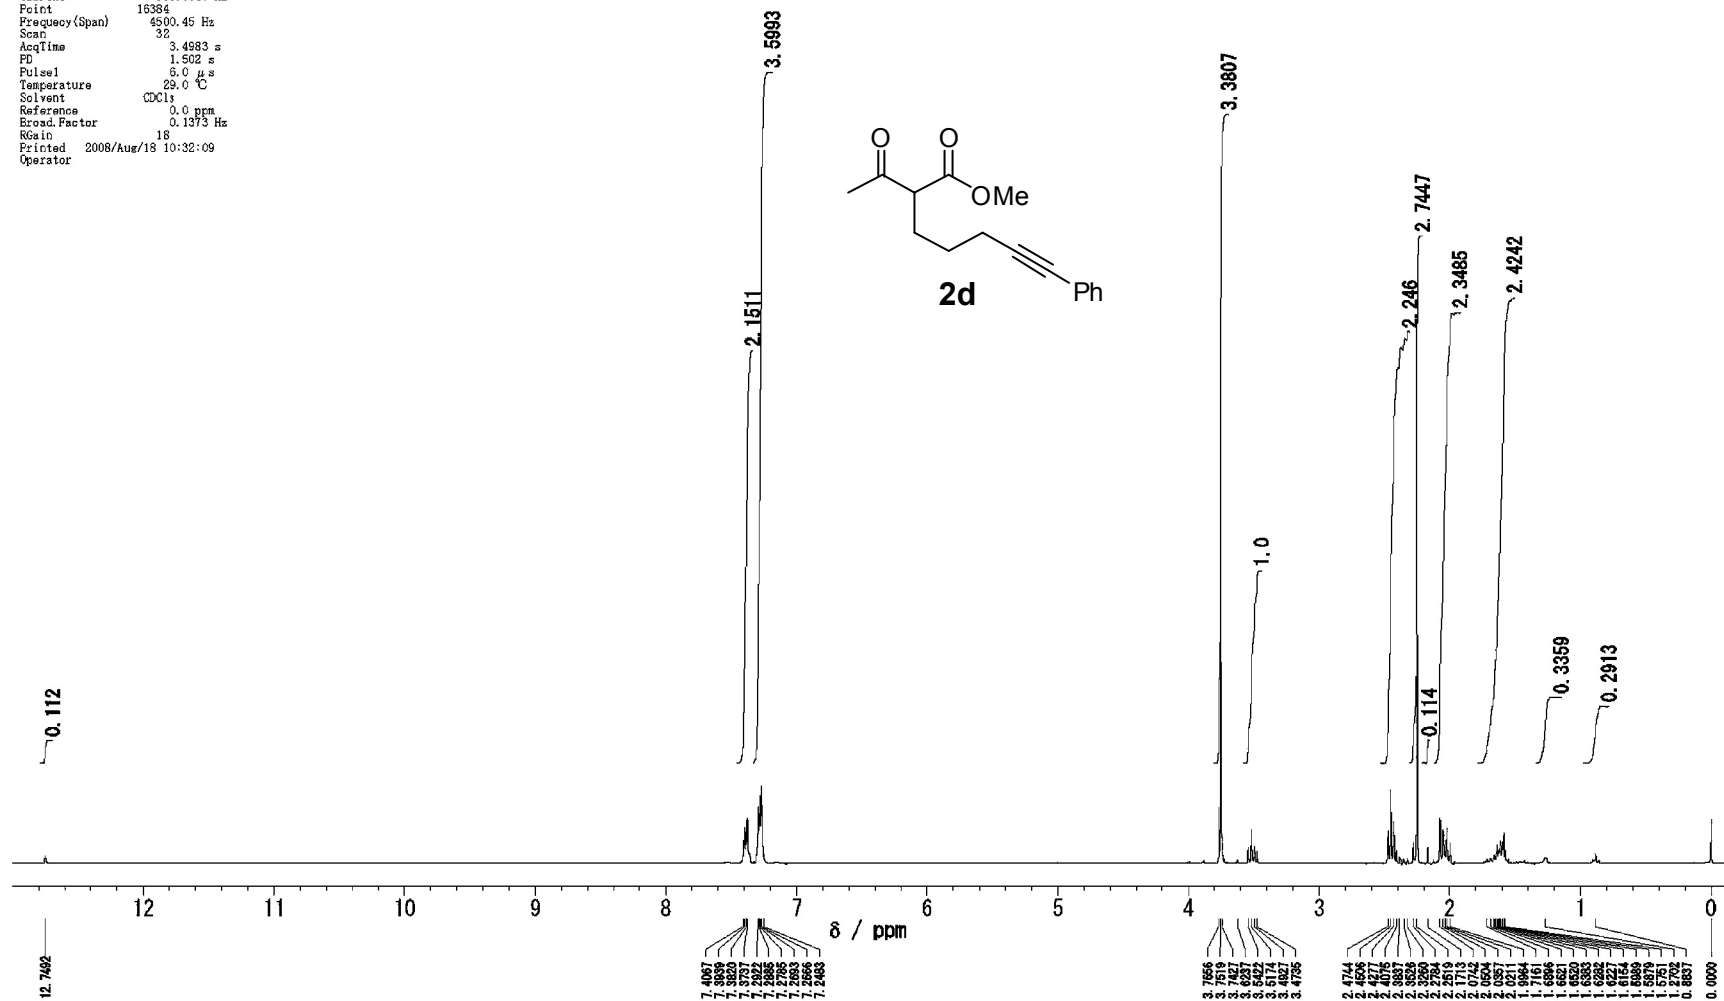

File C:\DOCUMENTS AND SETTINGS\北海道大学\MY DOCUMENTS\WBELL NMR データ 05Q1V6H1DBTOWHID-2VHID-2-77C-13C.FID\FID.ALS

Original File:

Date Mar 20 07

Comment

C13 Statdard Observe

Stick=none Tune=5.4 Match=0.4

ObsNuc <sup>13</sup>C  
ExMode NON  
ObsFreq 75.43 MHz  
ObsSet -1.0 kHz  
ObsFine 996.3672 Hz  
Point 32768  
Frequency(Span) 13761.73 Hz  
Scan 320  
AcqTime 1.4992 s  
PU 1.501 s  
Pulse1 8.0  $\mu$ s  
Temperature 29.0  $^{\circ}$ C  
Solvent CDCl<sub>3</sub>  
Reference 77.0 ppm  
Broad Factor 0.2863 Hz  
RGain 30  
Printed 2008/Aug/18 10:48:46  
Operator

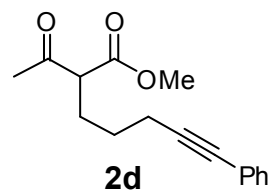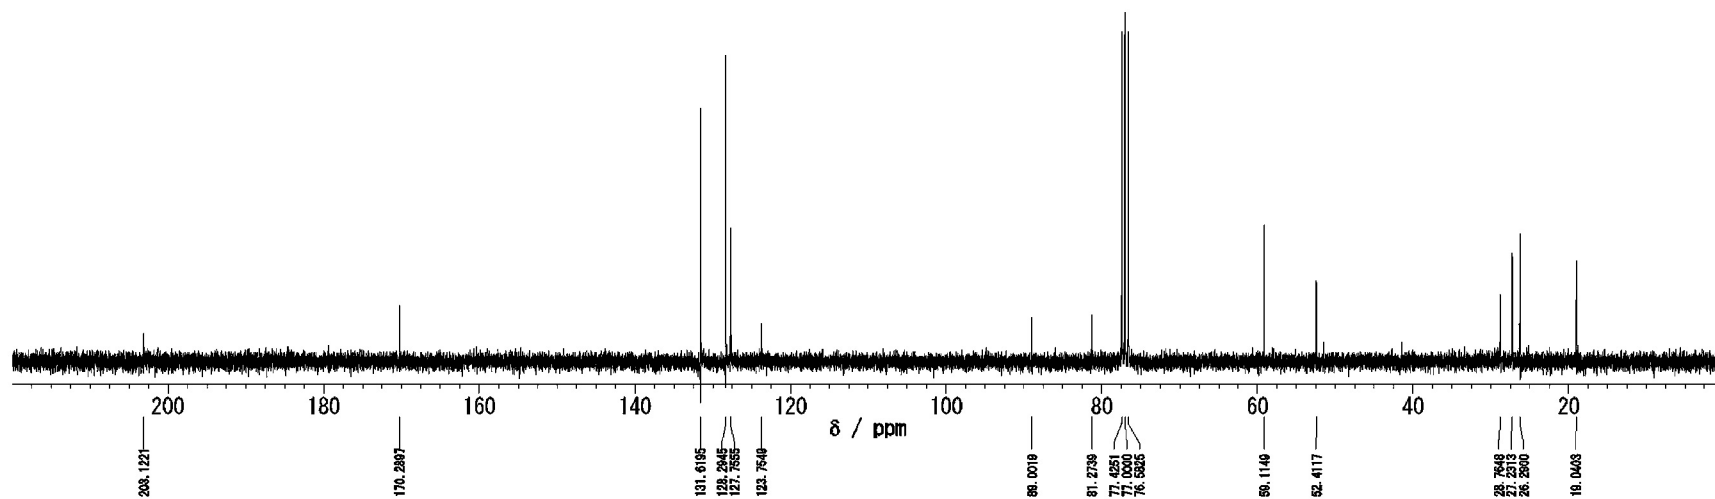

File C:\DOCUMENTS AND SETTINGS\北海道大学\MY DOCUMENTS\DELL NMR データ 06Q14\8HID6TOWHID-4\PHID-4-97A-PR1-1H.FID\FID.ALS

Original File:

Date Mar 7 03

Comment

STANDARD 1H OBSERVE

ObsNuc 1H  
ExMode NON  
ObsFreq 299.96 MHz  
ObsSet -1.0 kHz  
ObsFine 995.0047 Hz  
Point 16384  
Frequency (Span) 4500.45 Hz  
Scan 32  
AcqTime 3.4983 s  
FD 1.502 s  
Pulse1 6.0  $\mu$ s  
Temperature 29.0  $^{\circ}$ C  
Solvent CDCl<sub>3</sub>  
Reference 0.0 ppm  
Broad.Factor 0.1373 Hz  
RGain 11  
Printed 2008/Aug/18 10:58:56  
Operator

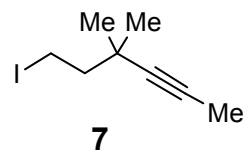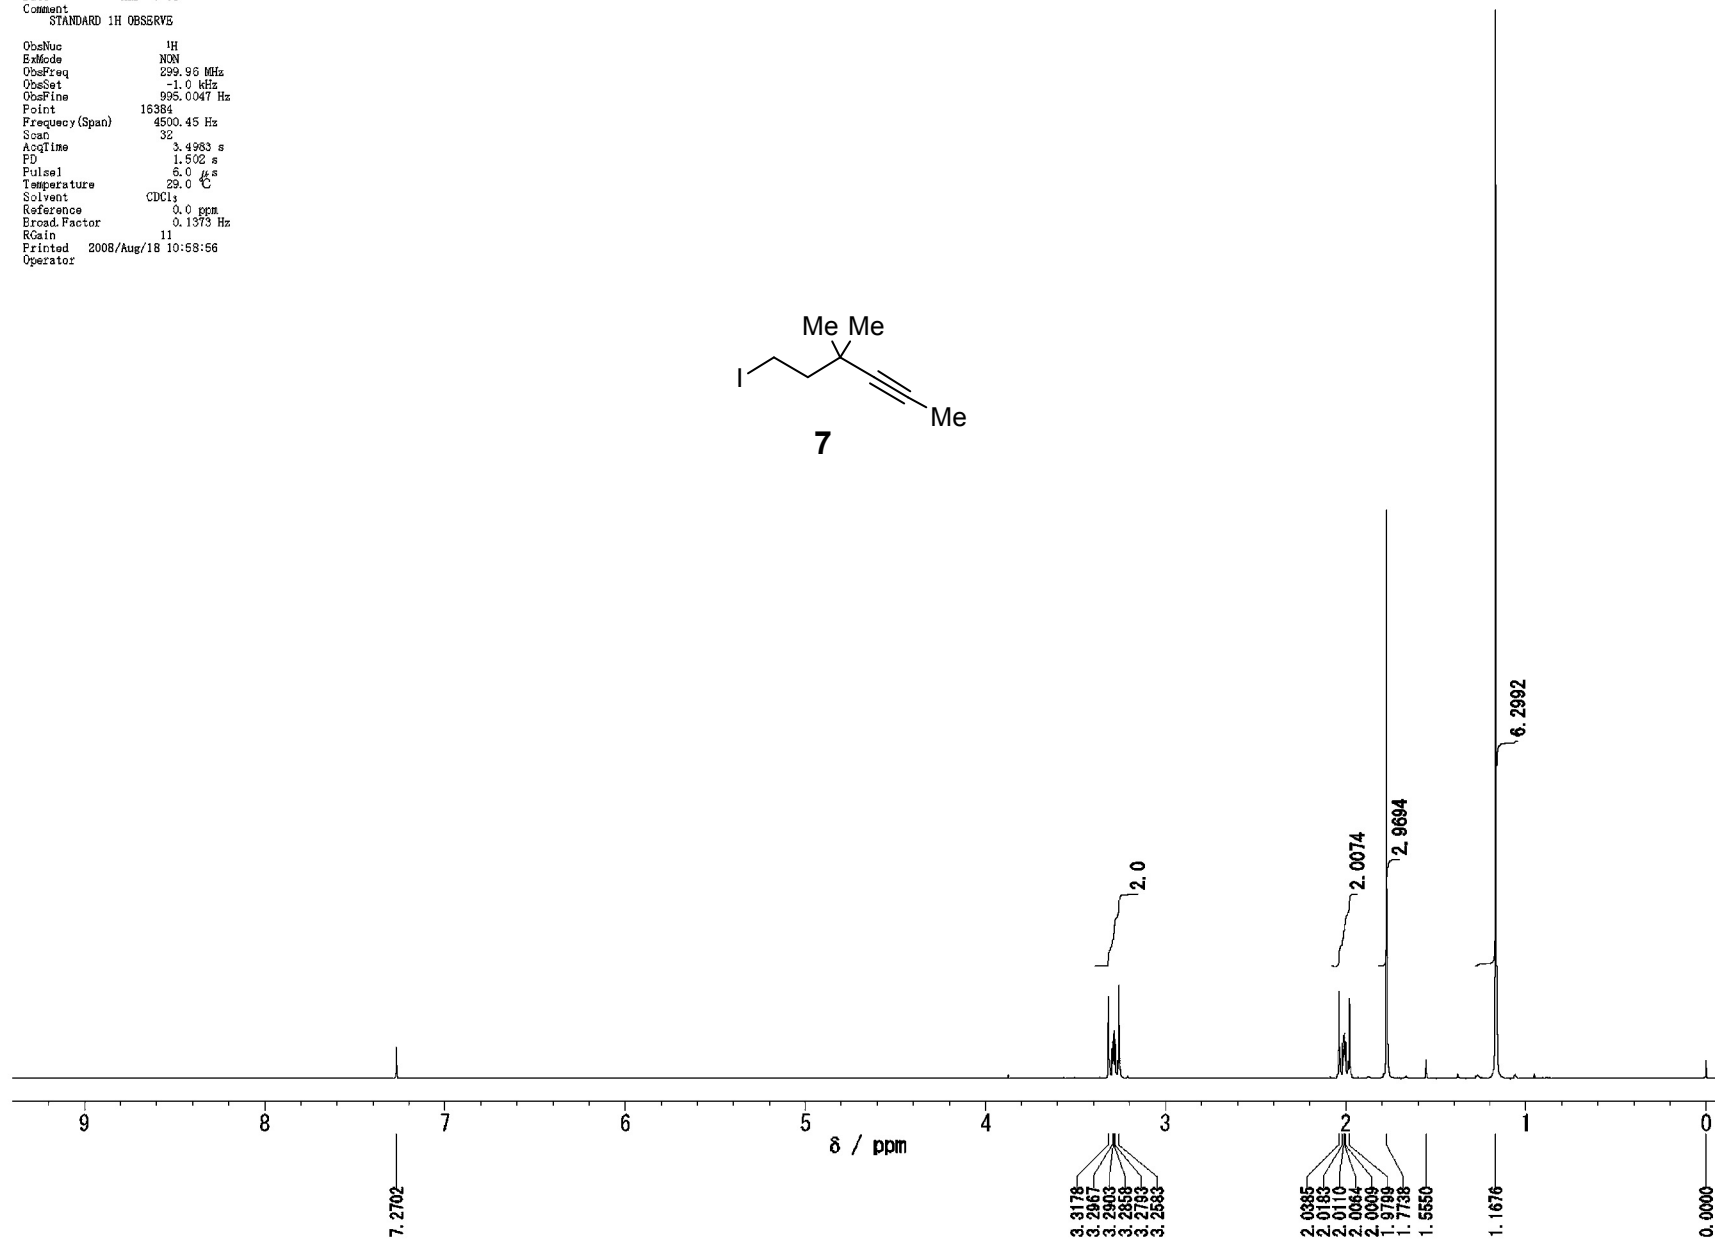

File C:\DOCUMENTS AND SETTINGS\北海道大学\MY DOCUMENTS\DELL NMR データ 06Q14\8HIDBTOWHID-4\PHID-4-97B-FR1-13C.FID\FID.ALS

Original File:

Date Mar 8 08

Comment

C13 Standard Observe  
Stick:none Tune=6.4 Match=0.4

ObsNuc <sup>13</sup>C  
ExMode NON  
ObsFreq 75.43 MHz  
ObsSet -1.0 kHz  
ObsPine 996.3672 Hz  
Point 32768  
Frequency (Span) 18761.73 Hz  
Scan 256  
AcqTime 1.4992 s  
PD 1.501 s  
Pulse1 6.0  $\mu$ s  
Temperature 29.0  $^{\circ}$ C  
Solvent CDCl<sub>3</sub>  
Reference 77.0 ppm  
Broad.Factor 0.2363 Hz  
RGain 30  
Printed 2008/Aug/18 11:01:40  
Operator

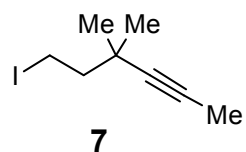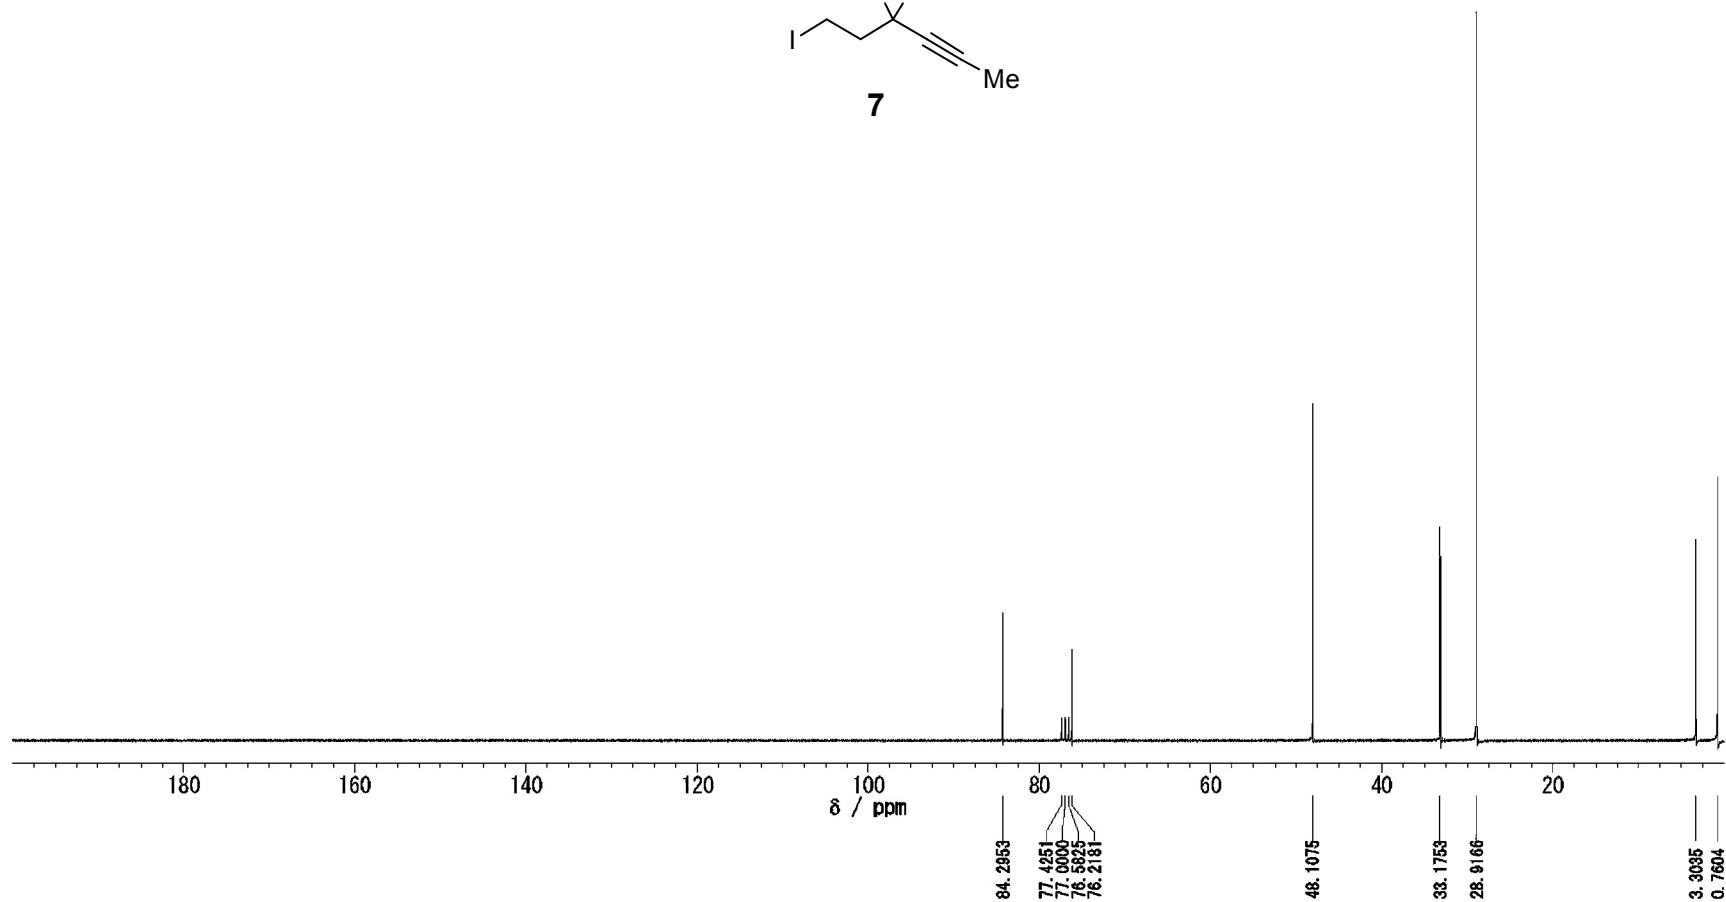

File C:\DOCUMENTS AND SETTINGS\北海道大学\MY DOCUMENTS\DELL NMR データ 06Q14\8HIDBTOWHID-4-96B-FR2-1H.FID\FID.AL5  
 Original File:  
 Date Apr 11 08  
 Comment STANDARD 1H OBSERVE

ObsNuc 1H  
 ExMode NON  
 ObsFreq 299.96 MHz  
 ObsSet -1.0 kHz  
 ObsFine 995.0047 Hz  
 Point 16384  
 Frequency (Span) 4500.45 Hz  
 Scan 32  
 AcqTime 3.4983 s  
 FD 1.502 s  
 Pulse1 6.0  $\mu$ s  
 Temperature 29.0  $^{\circ}$ C  
 Solvent CDCl<sub>3</sub>  
 Reference 0.0 ppm  
 Broad.Factor 0.1373 Hz  
 SGain 6  
 Printed 2008/Aug/18 11:04:45  
 Operator

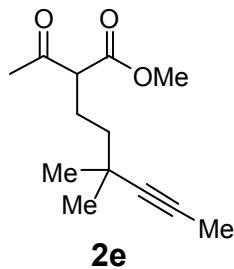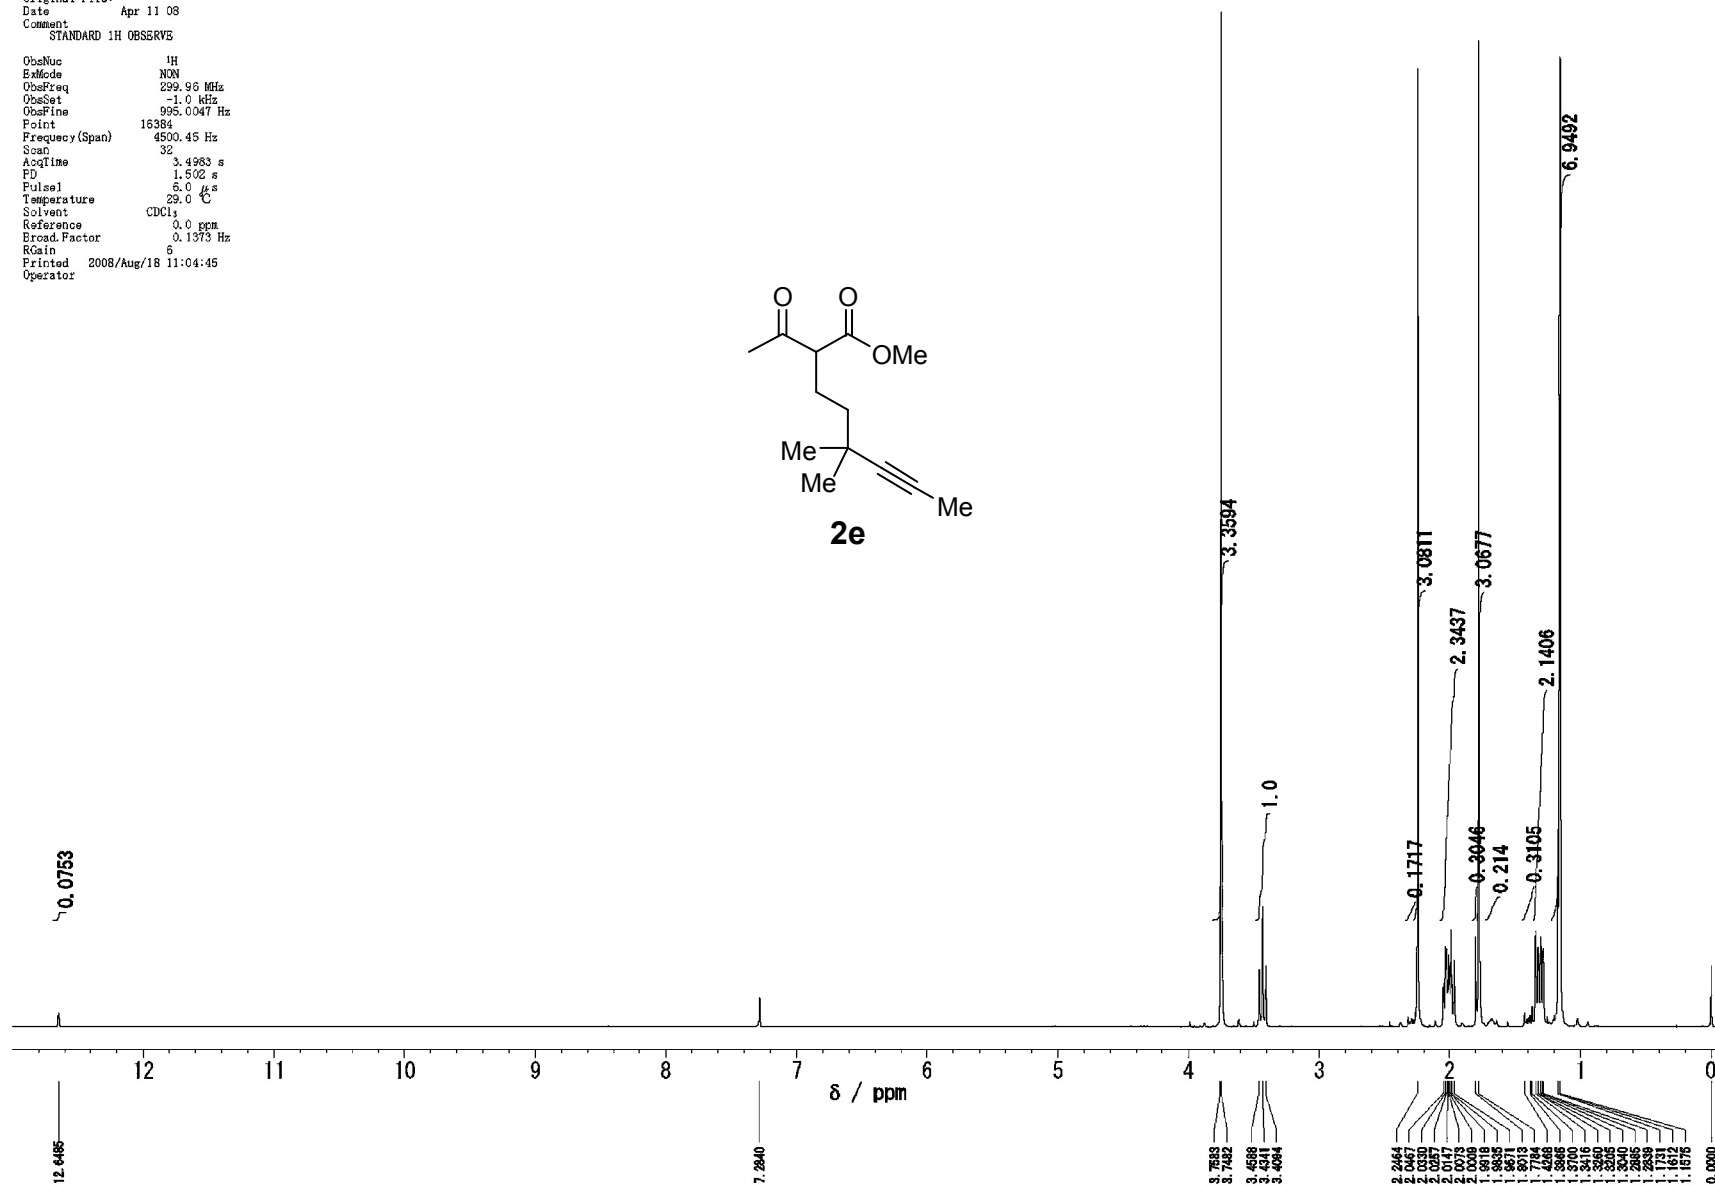

File C:\DOCUMENTS AND SETTINGS\北海道大学\NMR データ 06Q14\8HIDTOWHID-4-98C-FR2-13C.FID\FID.ALS  
 Original File:  
 Date Apr 11 08  
 Comment  
 C13 Standard Observe  
 Stick:none Tune=6.4 Match=0.4

ObsNuq 13C  
 ExMode NON  
 ObsFreq 75.43 MHz  
 ObsSet -1.0 kHz  
 ObsPine 996.3672 Hz  
 Point 32768  
 Frequency (Span) 18761.73 Hz  
 Scan 1024  
 AcqTime 1.4992 s  
 PD 1.501 s  
 Pulse1 6.0  $\mu$ s  
 Temperature 29.0  $^{\circ}$ C  
 Solvent CDCl<sub>3</sub>  
 Reference 77.0 ppm  
 Broad Factor 0.2363 Hz  
 RGain 30  
 Printed 2008/Aug/18 11:07:23  
 Operator

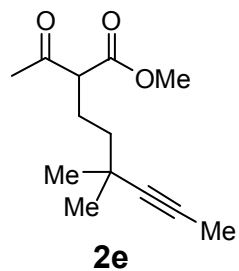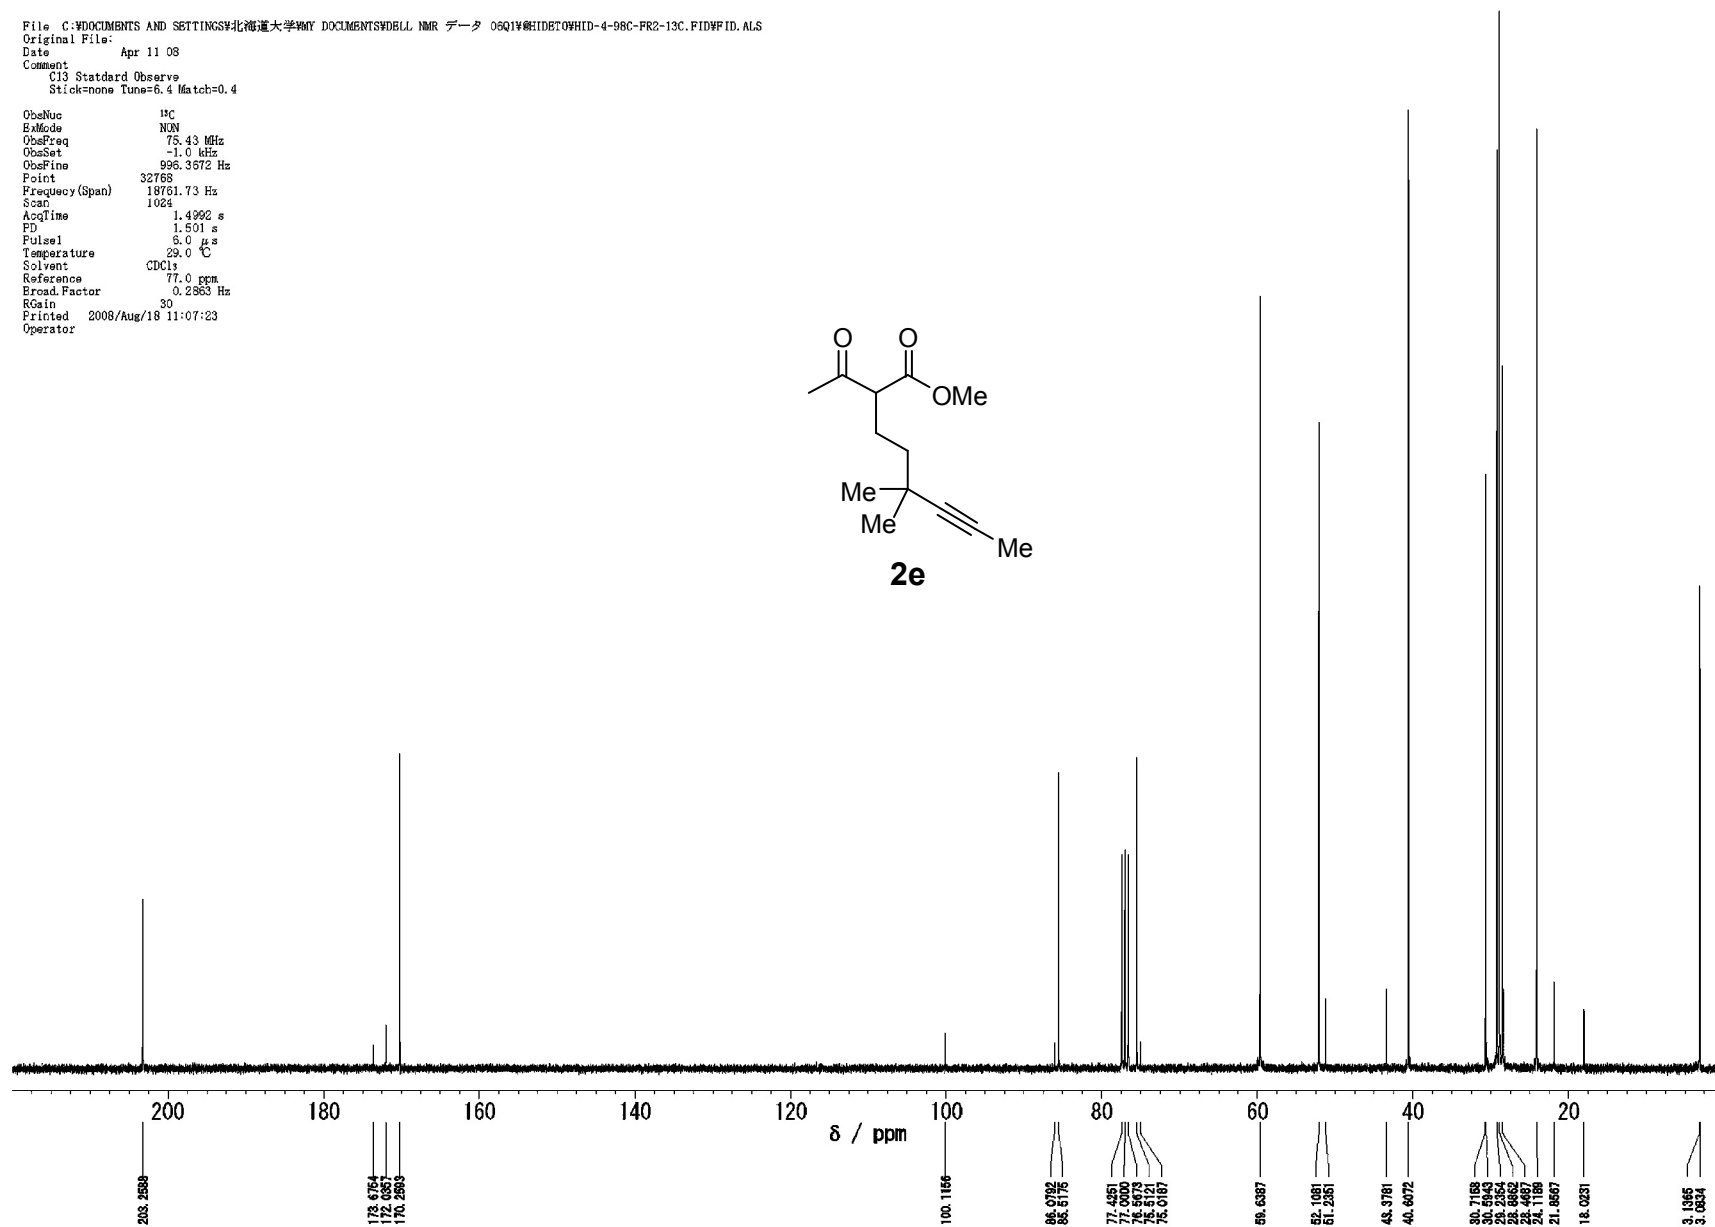

File C:\DOCUMENTS AND SETTINGS\北海道大学\NMR データ 06Q14\8HIDBTOWHID-3\HID-3-65B-PR1-1H.FID

VFID.ALS

Original File:

Date Sep 8 07

Comment

STANDARD 1H OBSERVE

ObsNuc 1H  
ExMode NON  
ObsFreq 299.96 MHz  
ObsSet -1.0 kHz  
ObsPino 995.0047 Hz  
Point 16384  
Frequency (Span) 4500.45 Hz  
Scan 64  
AcqTime 3.4983 s  
FD 1.502 s  
Pulse1 6.0  $\mu$ s  
Temperature 29.0  $^{\circ}$ C  
Solvent CDCl<sub>3</sub>  
Reference 0.0 ppm  
Broad.Factor 0.1373 Hz  
RGain 2  
Printed 2008/Aug/18 11:44:23

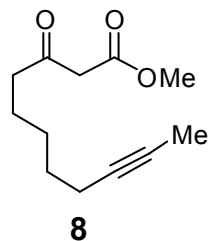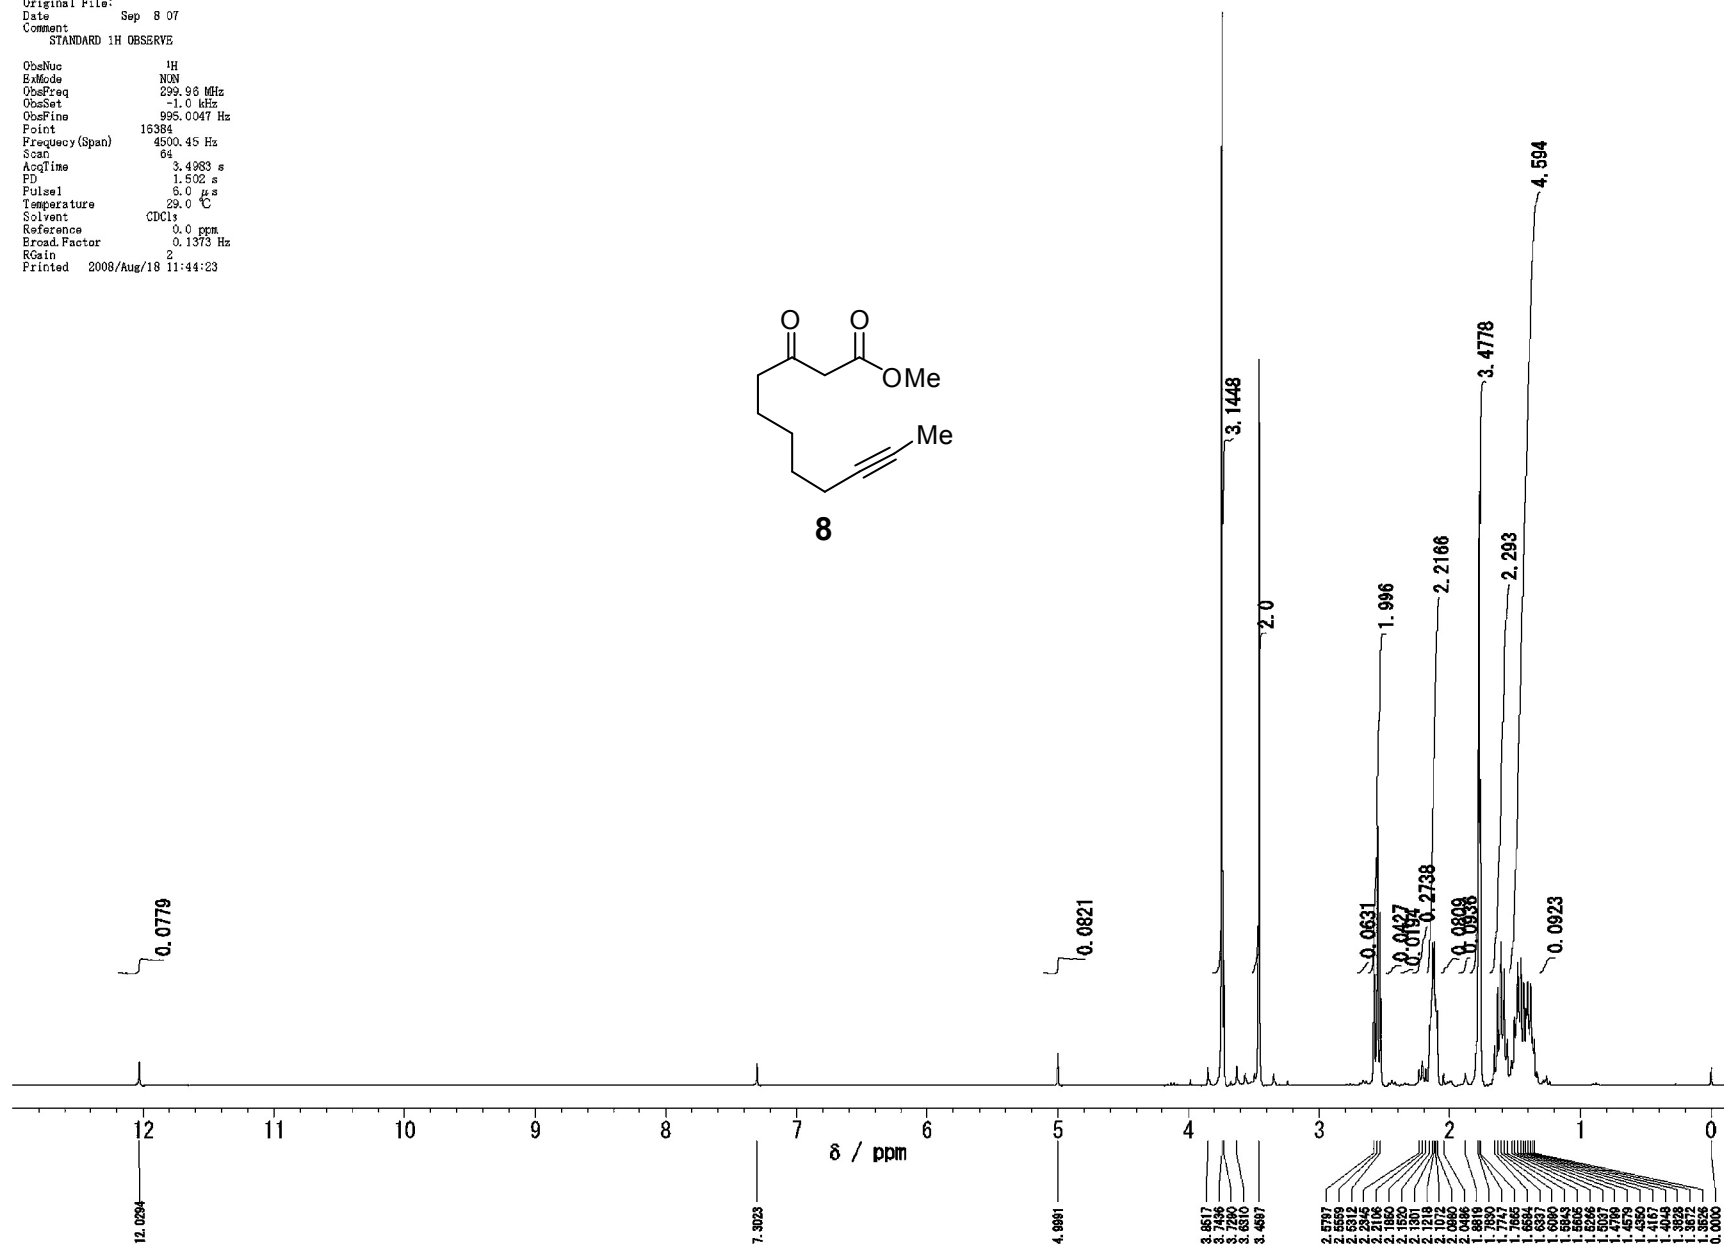



File C:\DOCUMENTS AND SETTINGS\北海道大学\NMR データ 06Q14\8HID6T0VHID-3\HID-3-65D-PR1-13C.FID\FID.ALS

Original File:

Date Sep 8 07

Comment

C13 Standard Observe  
Stick:none Tune=6.4 Match=0.4

ObsNuc <sup>13</sup>C  
ExMode NON  
ObsFreq 75.43 MHz  
ObsSet -1.0 kHz  
ObsPine 996.3672 Hz  
Point 65536  
Frequency (Span) 22829.23 Hz  
Scan 44544  
AcqTime 1.4989 s  
PD 1.501 s  
Pulse1 6.0  $\mu$ s  
Temperature 29.0  $^{\circ}$ C  
Solvent CDCl<sub>3</sub>  
Reference 77.0 ppm  
Broad.Factor 0.1726 Hz  
RGain 30  
Printed 2008/Aug/18 11:49:42

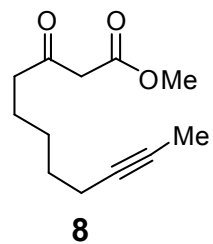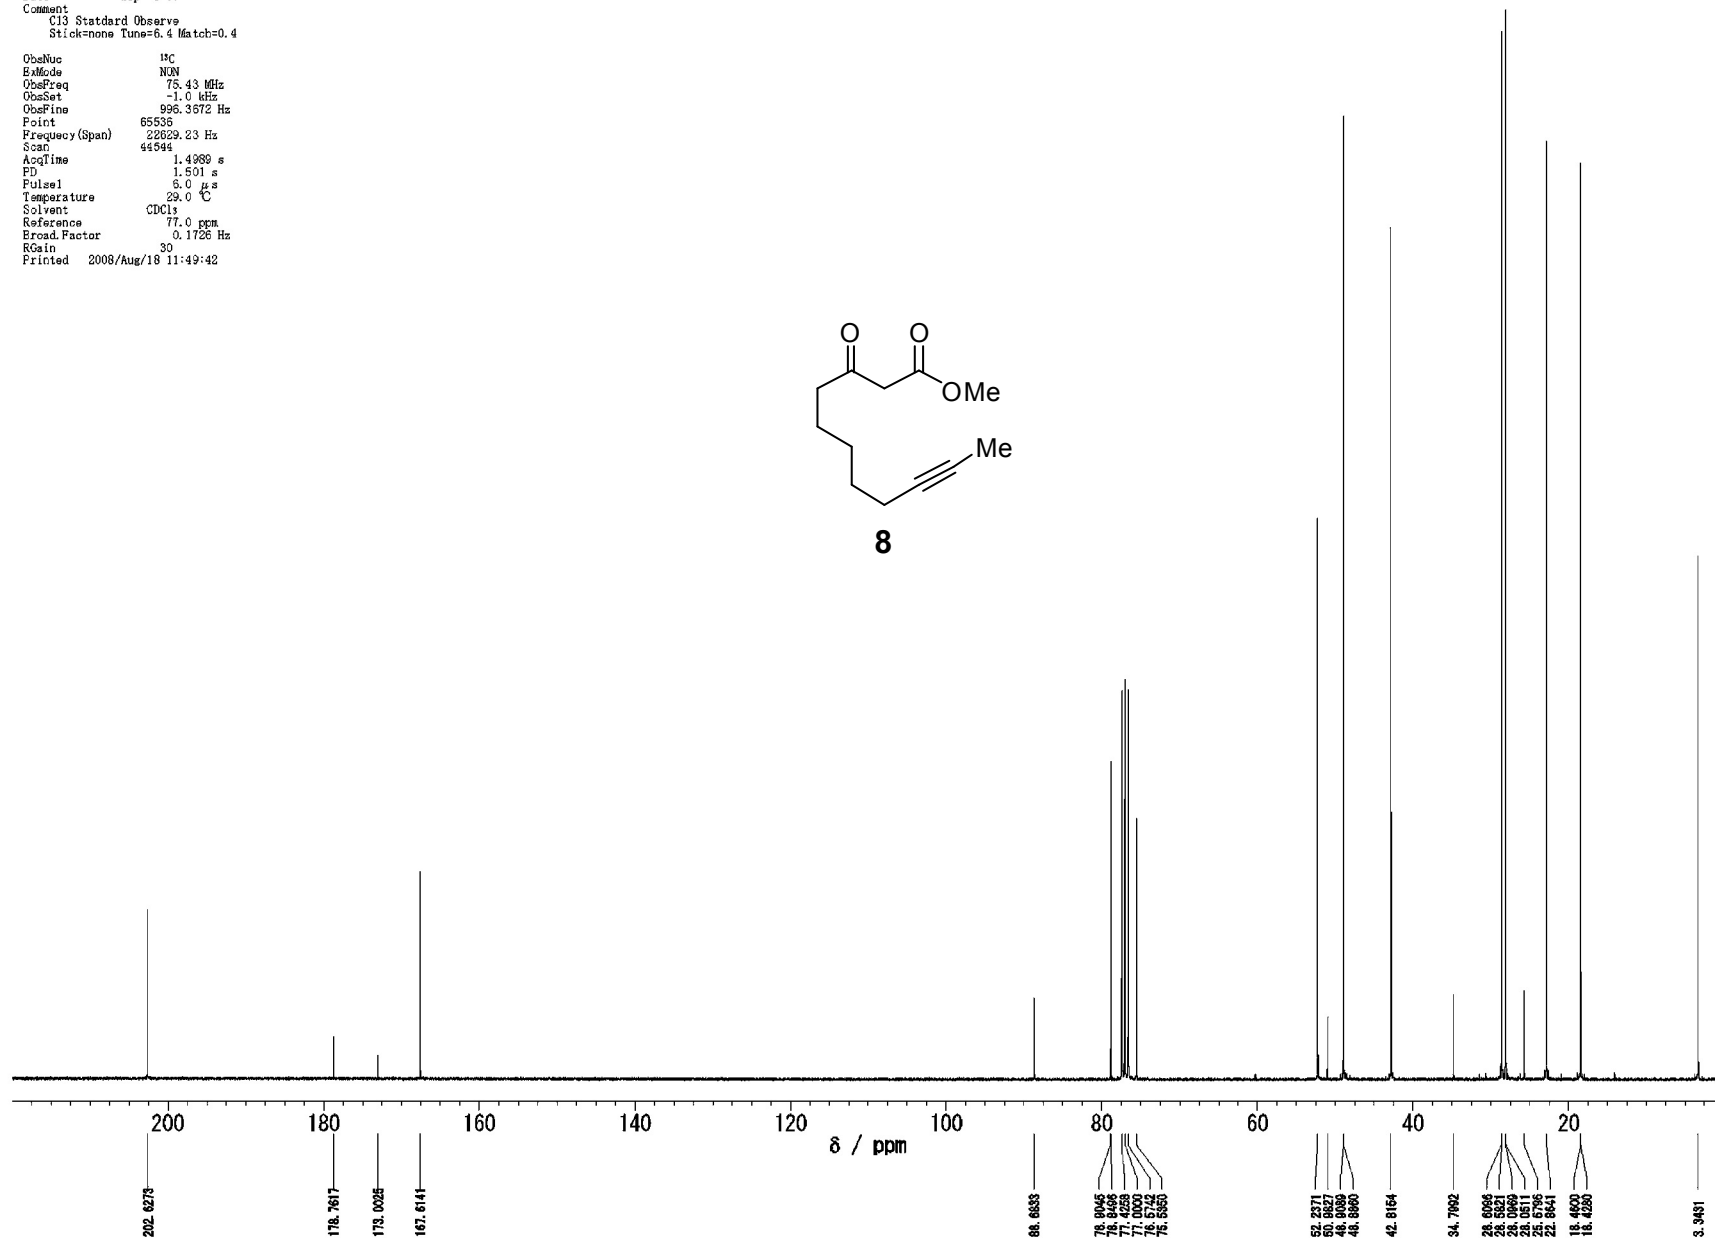

File C:\DOCUMENTS AND SETTINGS\北海道大学\NMR データ 06Q14\8HIDBTOWHID-3PHID-3-66C-PR1-1H.FID\FID.ALS  
 Original File:  
 Date Sep 11 07  
 Comment STANDARD 1H OBSERVE

ObsNuc 1H  
 ExMode NON  
 ObsFreq 299.96 MHz  
 ObsSet -1.0 kHz  
 ObsFine 995.0047 Hz  
 Point 16384  
 Frequency (Span) 4500.45 Hz  
 Scan 32  
 AcqTime 3.4983 s  
 FD 1.502 s  
 Pulse1 6.0  $\mu$ s  
 Temperature 29.0  $^{\circ}$ C  
 Solvent CDCl<sub>3</sub>  
 Reference 0.0 ppm  
 Broad.Factor 0.1373 Hz  
 SGain 7  
 Printed 2008/Aug/18 11:52:19  
 Operator

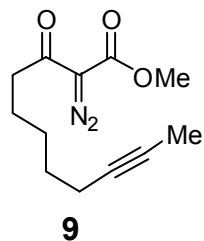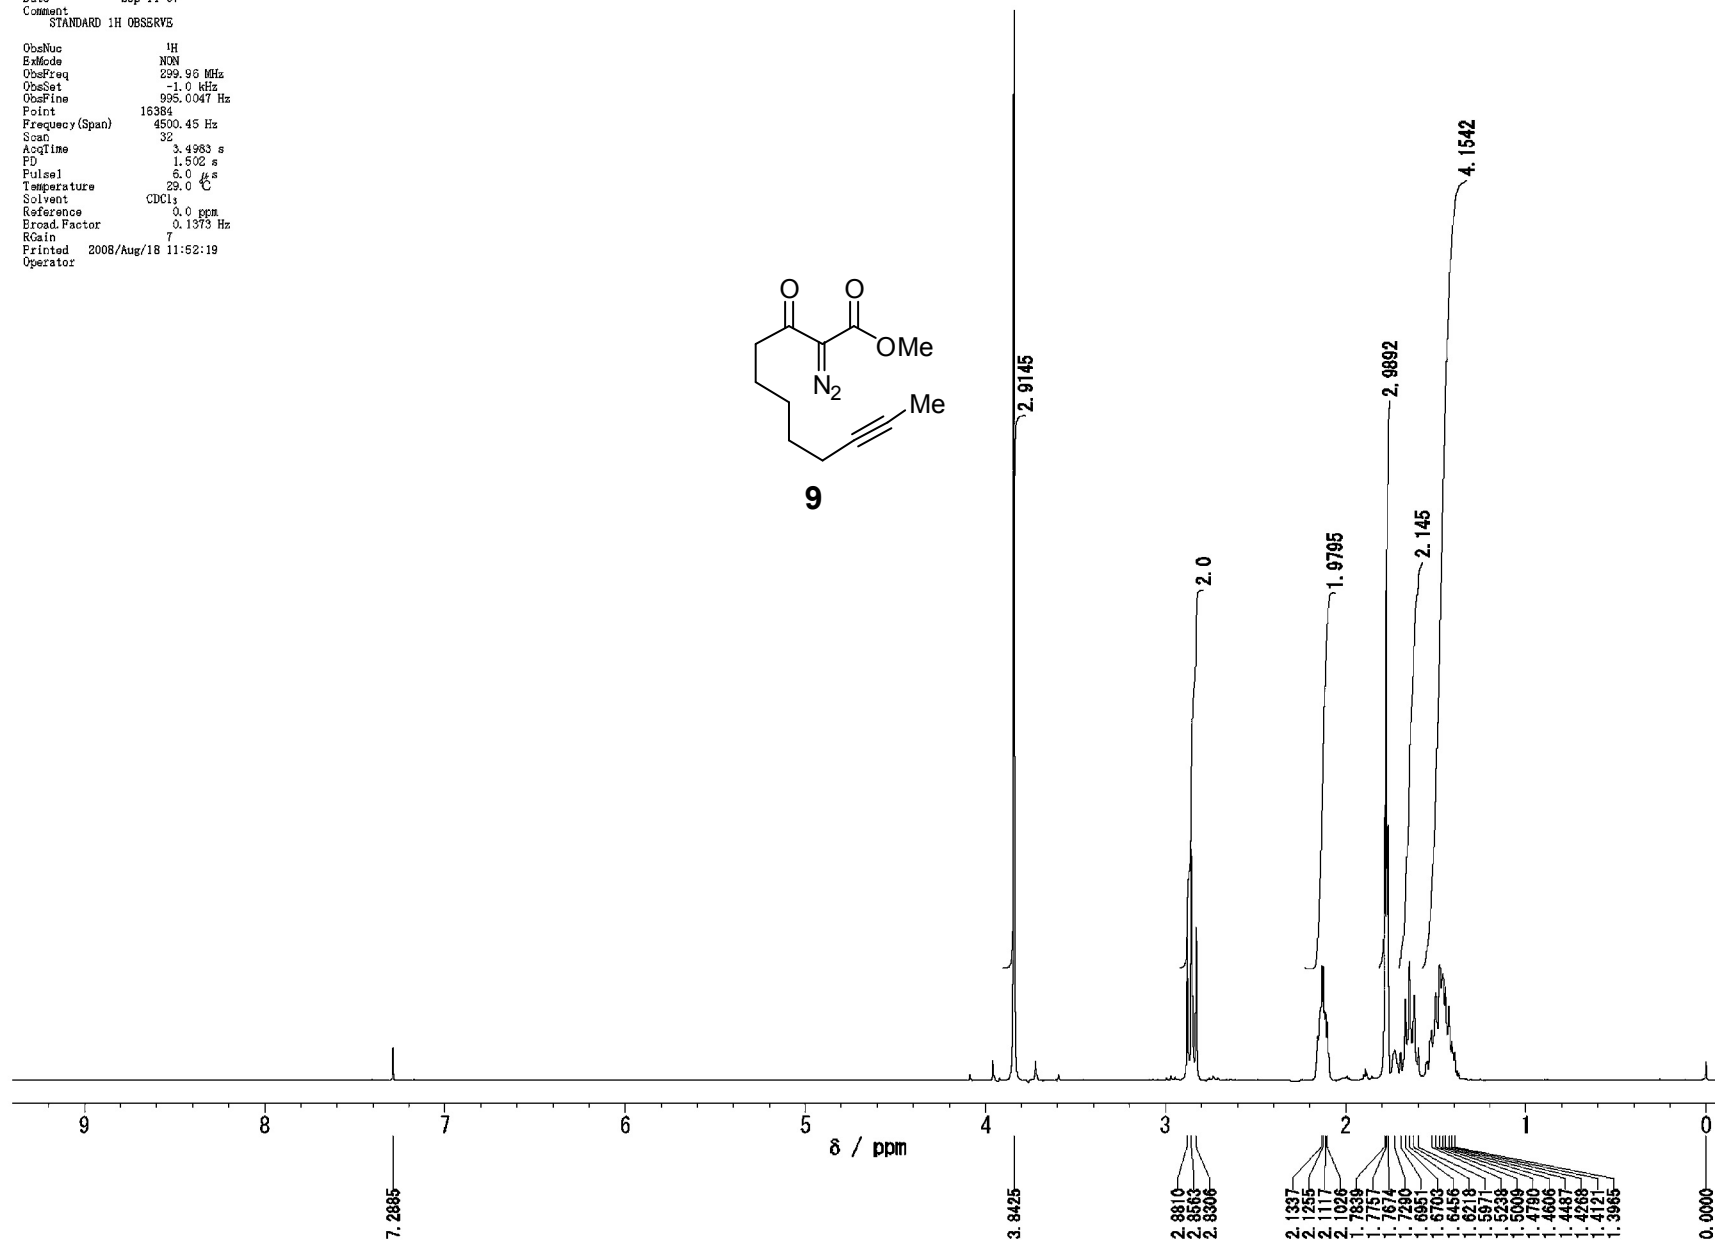

File C:\DOCUMENTS AND SETTINGS\北海道大学\NMR データ 06Q14\81D6T0WHD-3\WHD-3-66D-PR1-13C.FID\FID.ALS

Original File:

Date Sep 11 07

Comment

C13 Standard Observe  
Stick:none Tune=6.4 Match=0.4

ObsNuc <sup>13</sup>C  
ExMode NON  
ObsFreq 75.43 MHz  
ObsSet -1.0 kHz  
ObsFino 996.3672 Hz  
Point 32768  
Frequency (Span) 18761.73 Hz  
Scan 640  
AcqTime 1.4992 s  
PD 1.501 s  
Pulse1 6.0 μs  
Temperature 29.0 °C  
Solvent CDCl<sub>3</sub>  
Reference 77.0 ppm  
Broad.Factor 0.2363 Hz  
RGain 30  
Printed 2008/Aug/18 11:57:48  
Operator

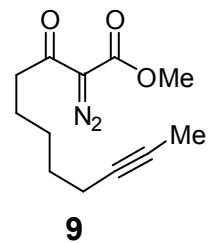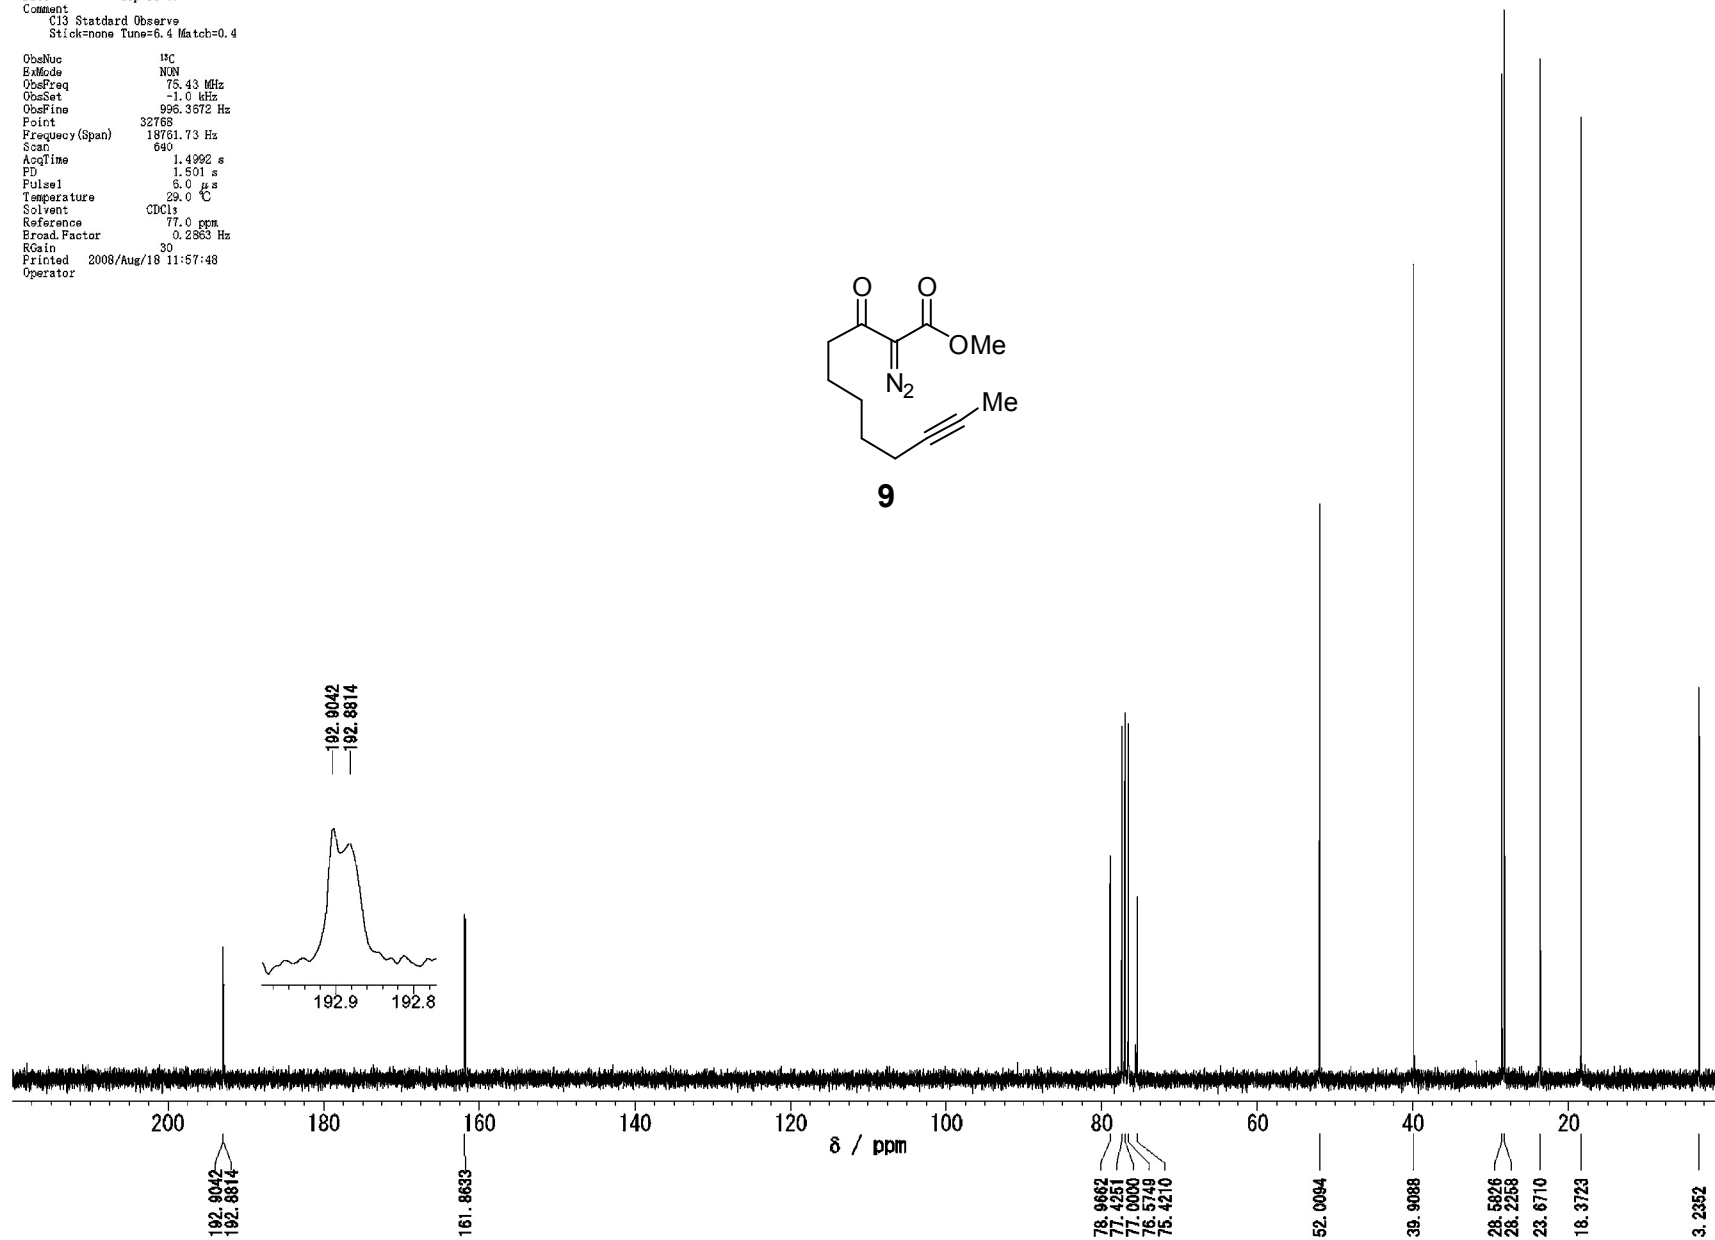

```

ObsF1uc          1H
ExpMode          NON
FreqRef           299.98 MHz
ObsFreq          -1.0 kHz
ObsSet           995.0047 Hz
ObsF1no          15384
Point            64
Frequency (Span) 4500.45 Hz
Scan             3.4983 s
AcqTime          1.502 s
PD               6.0  $\mu$ s
PulseProgram     29.0  $^{\circ}$ C
Temperature      CDCl3
Solvent          0.0 ppm
BroadFactor      0.1373 Hz
RGain            12
Printed 2008/Aug/18 11:35:04

```

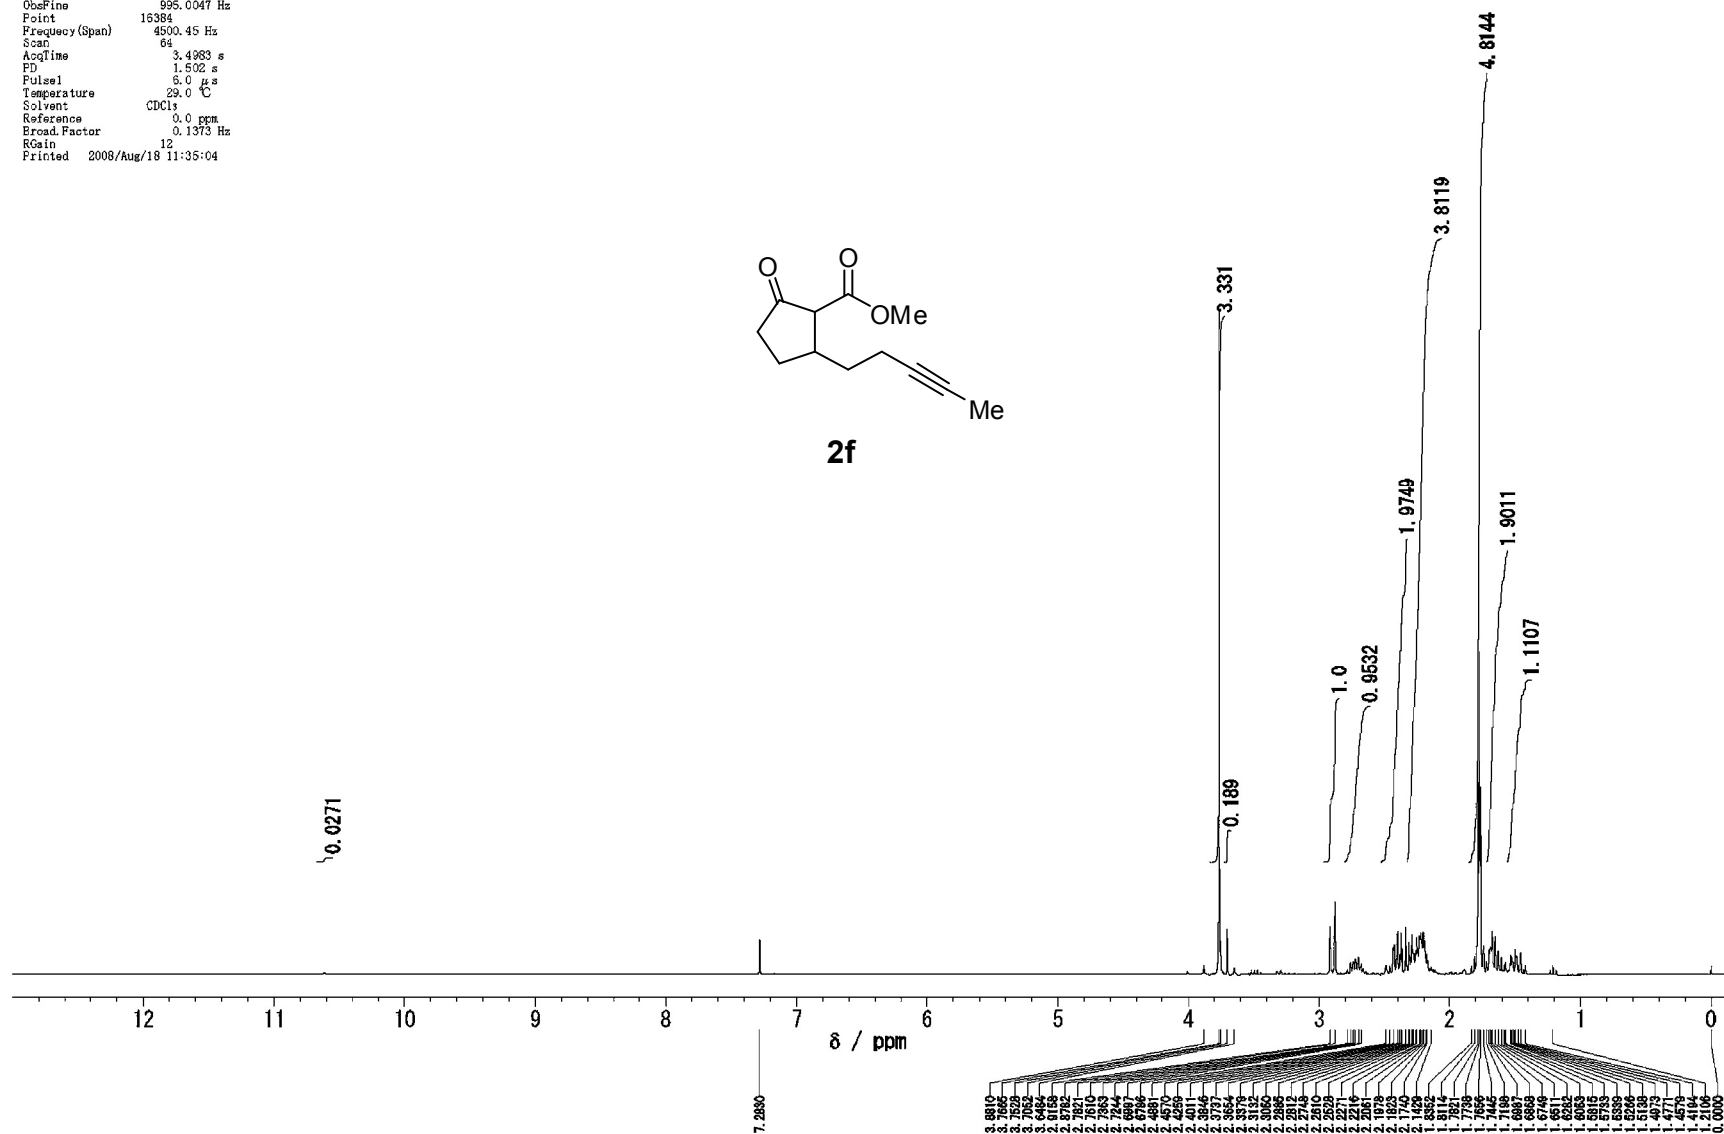

File C:\DOCUMENTS AND SETTINGS\北海道大学\MY DOCUMENTS\DELL NMR データ 0601\48HIDBTOWHID-3PHID-3-6TD-PR1-13C.FI

DWID.ALS

Original File:

Date Sep 12 07

Comment

C13 Standard Observe

Stick:none Tune=6.4 Match=0.4

ObsNuc <sup>13</sup>C  
ExMode NON  
ObsFreq 75.43 MHz  
ObsSet -1.0 kHz  
ObsFine 996.3672 Hz  
Point 32768  
Frequency (Span) 18761.73 Hz  
Scan 14464  
AcqTime 1.4992 s  
PD 1.501 s  
Pulse1 6.0  $\mu$ s  
Temperature 29.0  $^{\circ}$ C  
Solvent CDCl<sub>3</sub>  
Reference 77.0 ppm  
Broad.Factor 0.2863 Hz  
RGain 30

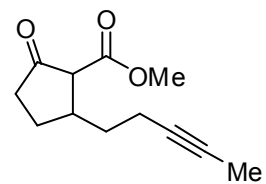

2f

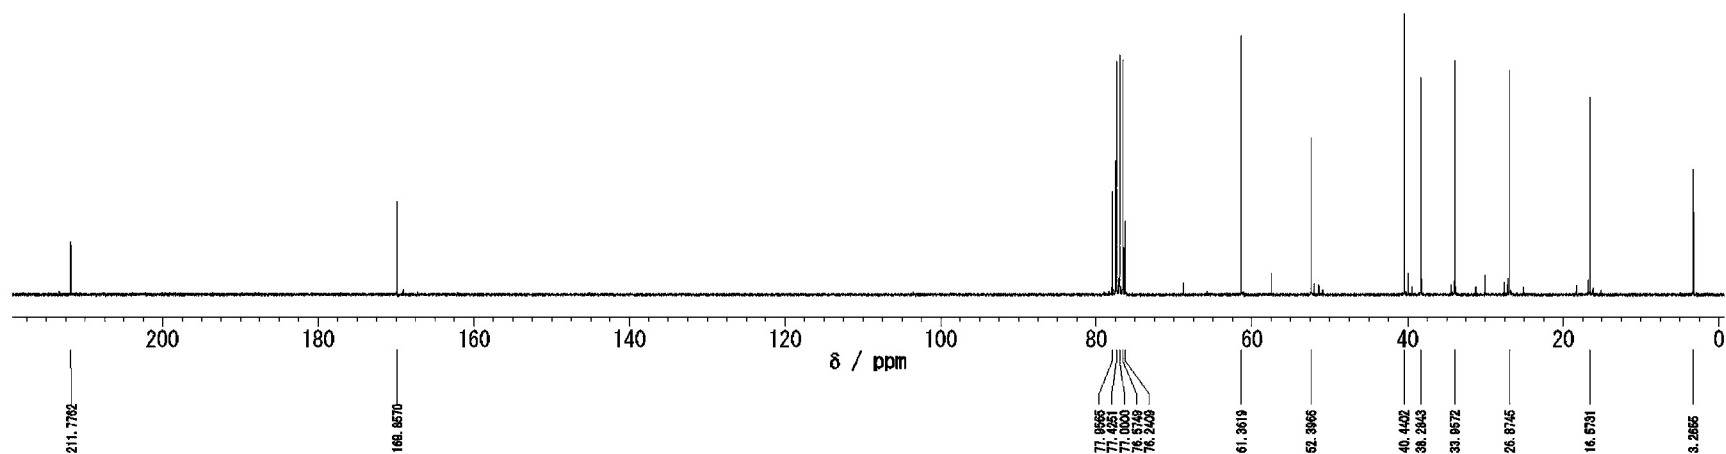

File C:\DOCUMENTS AND SETTINGS\北海道大学\NMR データ 06Q14\81D6T0WHD-4\WHD-4-109G-GPC-PR1-ALL-COLLECTED-1H.FID\WHD.ALS  
 Original File:  
 Date Mar 17 08  
 Comment  
 STANDARD 1H OBSERVE

ObsNuc 1H  
 ExMode NON  
 ObsFreq 299.96 MHz  
 ObsSet -1.0 kHz  
 ObsFine 995.0047 Hz  
 Point 16384  
 Frequency (Span) 4500.45 Hz  
 Scan 32  
 AcqTime 3.4983 s  
 FD 1.502 s  
 Pulse 6.0  $\mu$ s  
 Temperature 29.0  $^{\circ}$ C  
 Solvent CDCl<sub>3</sub>  
 Reference 0.0 ppm  
 Broad.Factor 0.1373 Hz  
 SGain 19  
 Printed 2008/Aug/18 20:11:46  
 Operator

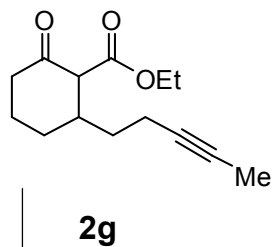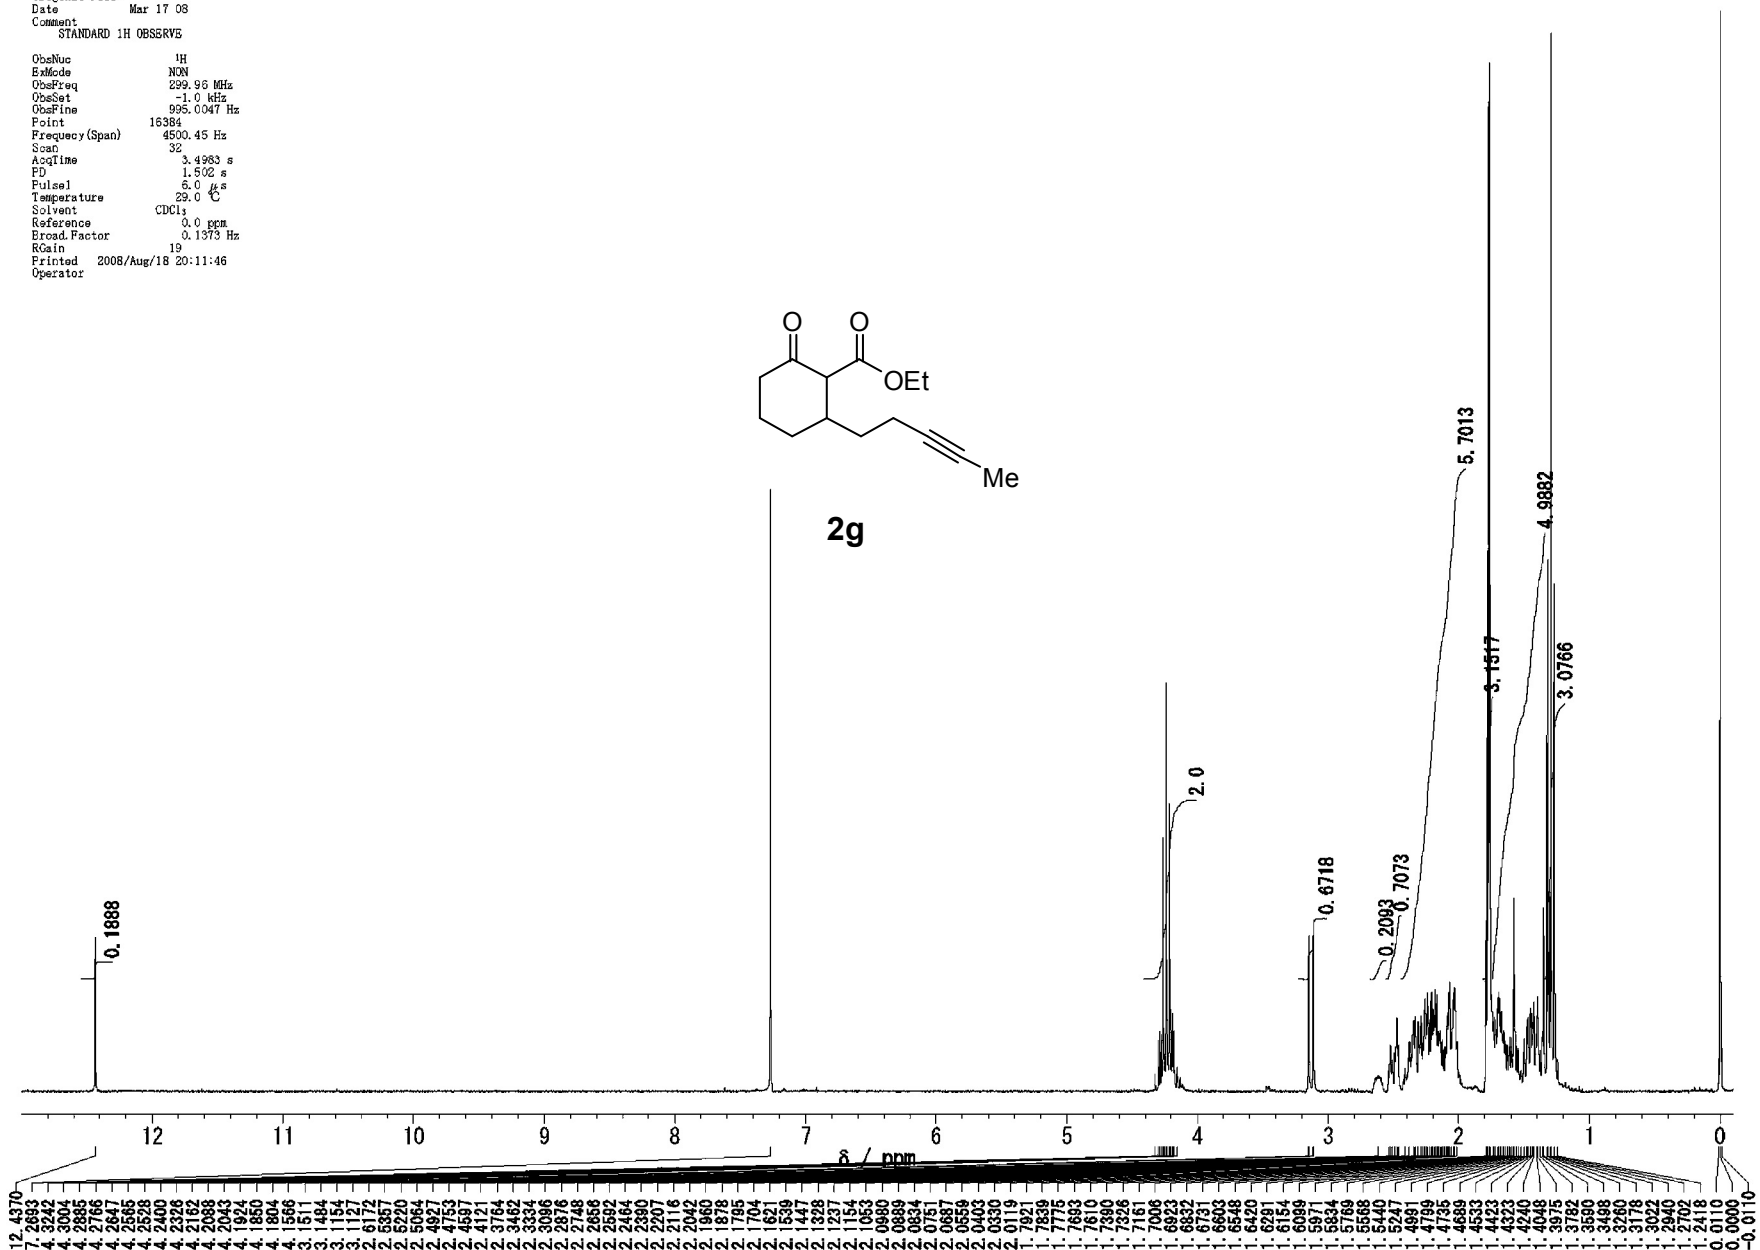

File C:\DOCUMENTS AND SETTINGS\北海道大学\NMR データ 06Q14\8HIDBTOWHID-4\HID-4-109H-GFC-PR1-ALL-COLLECTED-13C.FID\FID.ALS

Original File:

Date Mar 17 08

Comment

C13 Standard Observe  
Stick:none Tune=6.4 Match=0.4

ObsNuc <sup>13</sup>C  
ExMode NON  
ObsFreq 75.43 MHz  
ObsSet -1.0 kHz  
ObsFino 996.3672 Hz  
Point 32768  
Frequency (Span) 18761.73 Hz  
Scan 768  
AcqTime 1.4992 s  
PD 1.501 s  
Pulse1 6.0 μs  
Temperature 29.0 °C  
Solvent CDCl<sub>3</sub>  
Reference 77.0 ppm  
Broad.Factor 0.2363 Hz  
RGain 30  
Printed 2008/Aug/18 20:13:57  
Operator

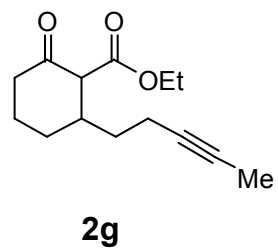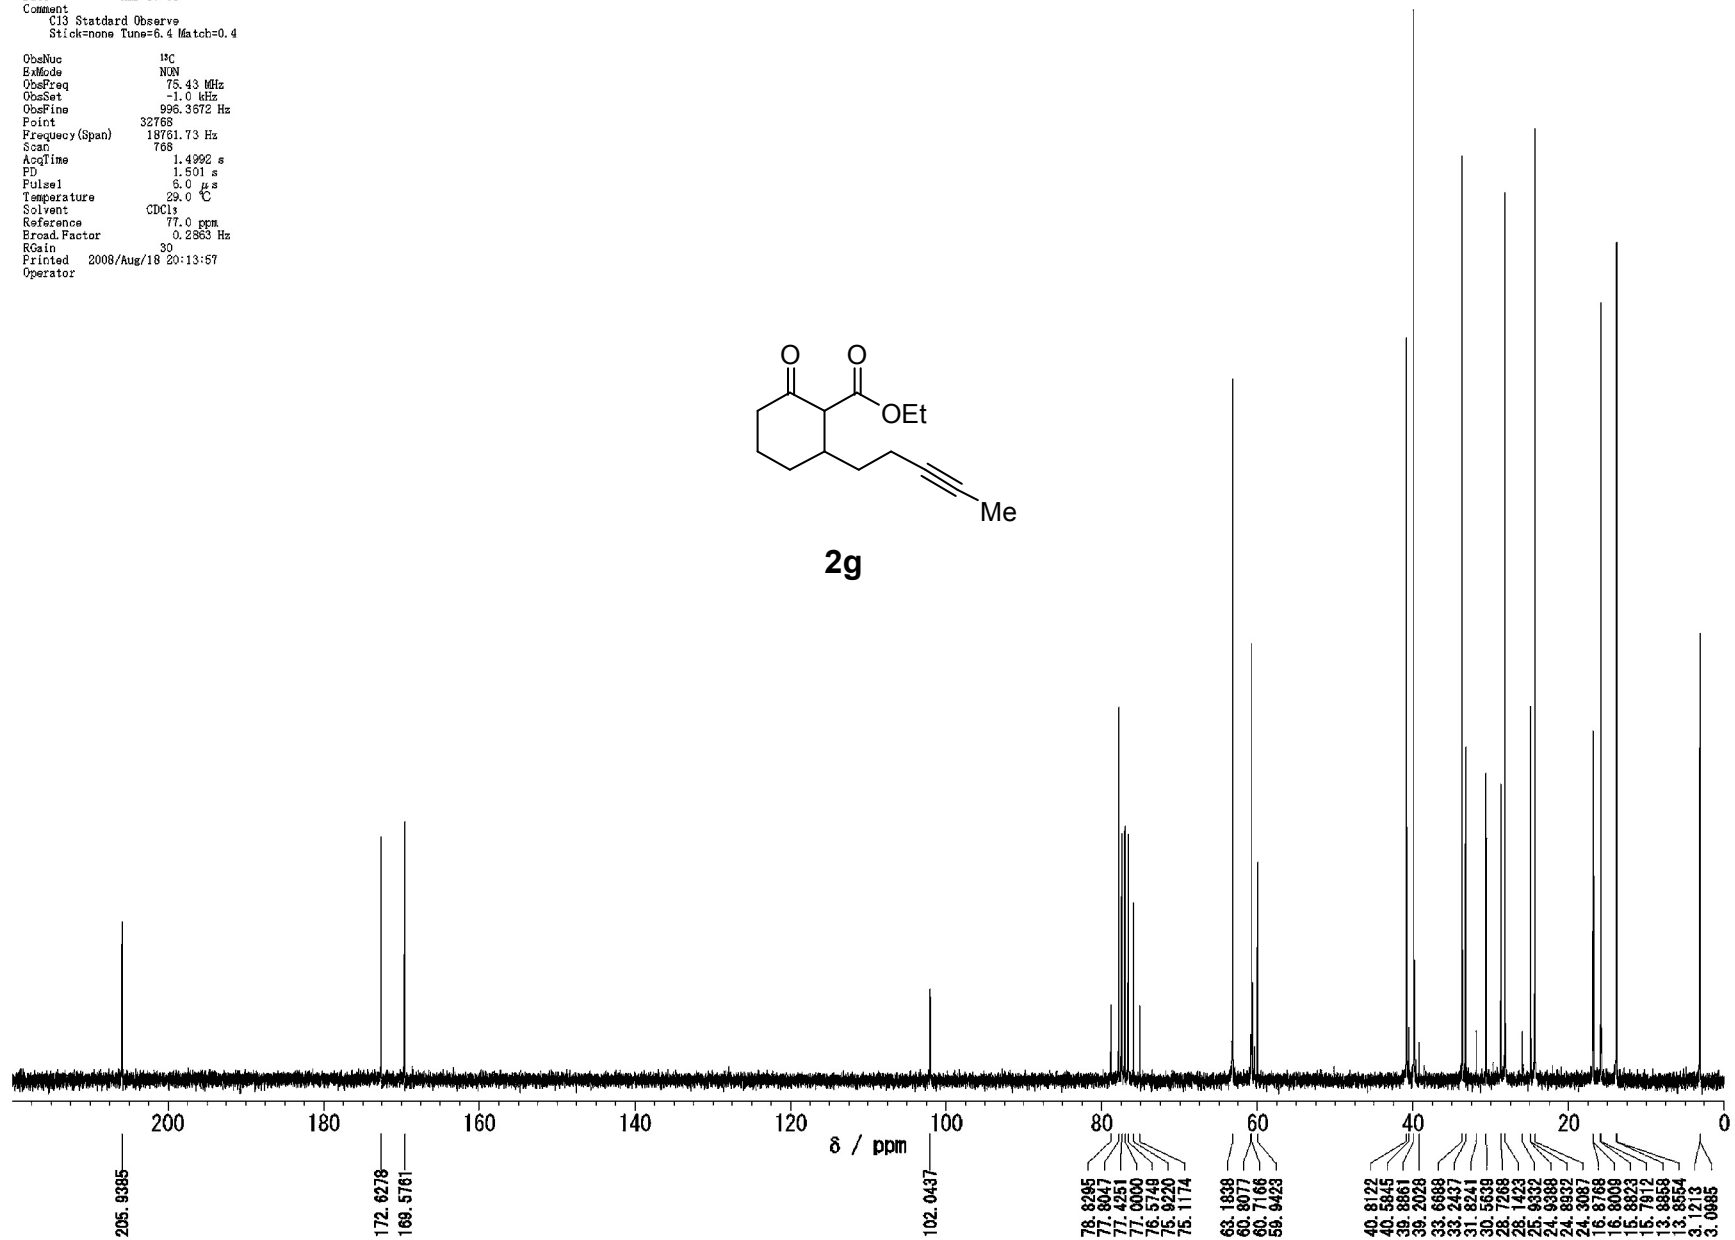

File C:\DOCUMENTS AND SETTINGS\北海道大学\MY DOCUMENTS\DELL NMR データ 06Q1\06HIDETOWHID-4\WHID-4-1046-GPC-PR4-1H.FID\FID.ALS  
 Original File:  
 Date Mar 11 08  
 Comment  
 STANDARD 1H OBSERVE

ObsMod 1H  
 ExMode NON  
 ObsFreq 299.96 MHz  
 ObsSet -1.0 kHz  
 ObsFine 995.0047 Hz  
 Point 16384  
 Frequency (Span) 4500.45 Hz  
 Scan 64  
 AcqTime 3.4983 s  
 PD 1.502 s  
 Pulse 6.0  $\mu$ s  
 Temperature 29.0  $^{\circ}$ C  
 Solvent CDCl<sub>3</sub>  
 Reference 0.0 ppm  
 Broad Factor 0.1373 Hz  
 RGain 18  
 Printed 2008/Aug/26 21:26:55  
 Operator

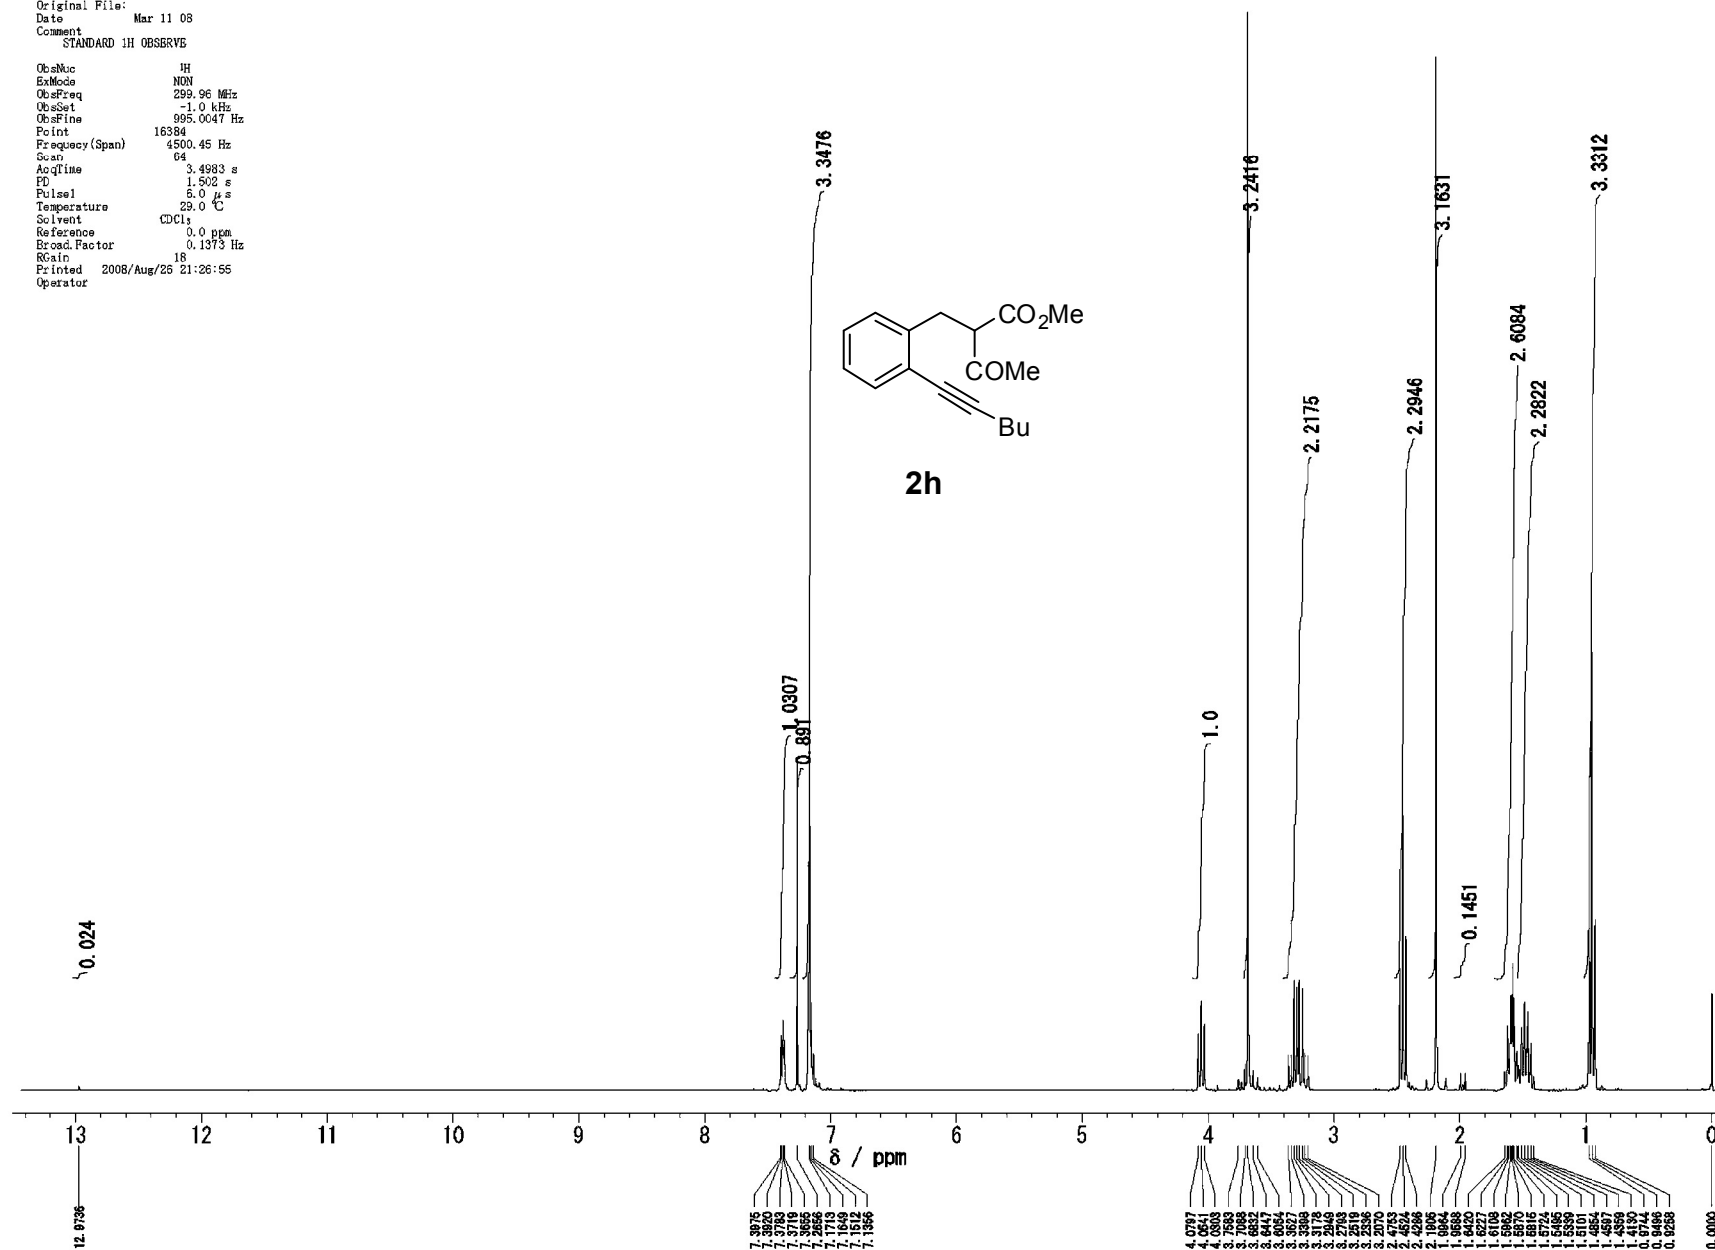



File C:\DOCUMENTS AND SETTINGS\北海道大学\MY DOCUMENTS\DELL NMR データ 06Q1\06HIDETOWHID-4\WHID-4-104F-GPC-FR4-13C.FID\WPID.ALS

Original File:

Date Mar 11 08

Comment

C13 Standard Observe  
Stick=none Tune=6.4 Match=0.4

ObsNuc <sup>13</sup>C  
ExMode NON  
ObsFreq 75.43 MHz  
ObsSet -1.0 kHz  
ObsFine 995.3672 Hz  
Point 32768  
Frequency (Span) 18761.73 Hz  
Scan 448  
AcqTime 1.4992 s  
PD 1.501 s  
Pulse 6.0  $\mu$ s  
Temperature 29.0  $^{\circ}$ C  
Solvent CDCl<sub>3</sub>  
Reference 77.0 ppm  
Broad Factor 0.2863 Hz  
RGain 30  
Printed 2008/Aug/26 21:29:11  
Operator

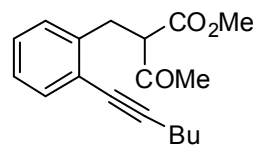

2h

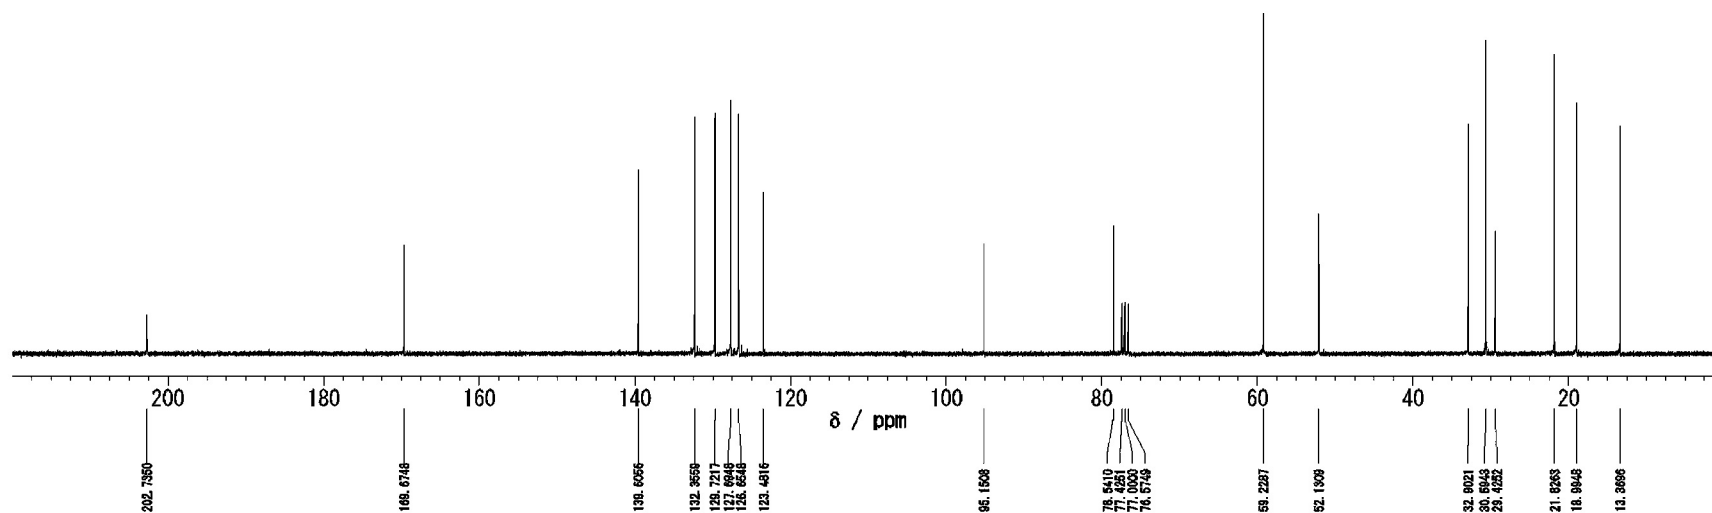

File C:\DOCUMENTS AND SETTINGS\北海道大学\NMR データ 06Q14\8HIDBTOWHID-3\HID-3-57-58B-FR3-1H.FID\FID.ALS  
 Original File:  
 Date Aug 30 07  
 Comment  
 STANDARD 1H OBSERVE

ObsNuc 1H  
 ExMode NON  
 ObsFreq 299.96 MHz  
 ObsSet -1.0 kHz  
 ObsFine 995.0047 Hz  
 Point 16384  
 Frequency (Span) 4500.45 Hz  
 Scan 64  
 AcqTime 3.4983 s  
 FD 1.502 s  
 Pulse1 6.0  $\mu$ s  
 Temperature 29.0  $^{\circ}$ C  
 Solvent CDCl<sub>3</sub>  
 Reference 0.0 ppm  
 Broad.Factor 0.1373 Hz  
 SGain 6  
 Printed 2008/Aug/18 12:10:51  
 Operator

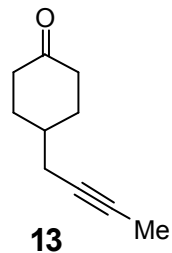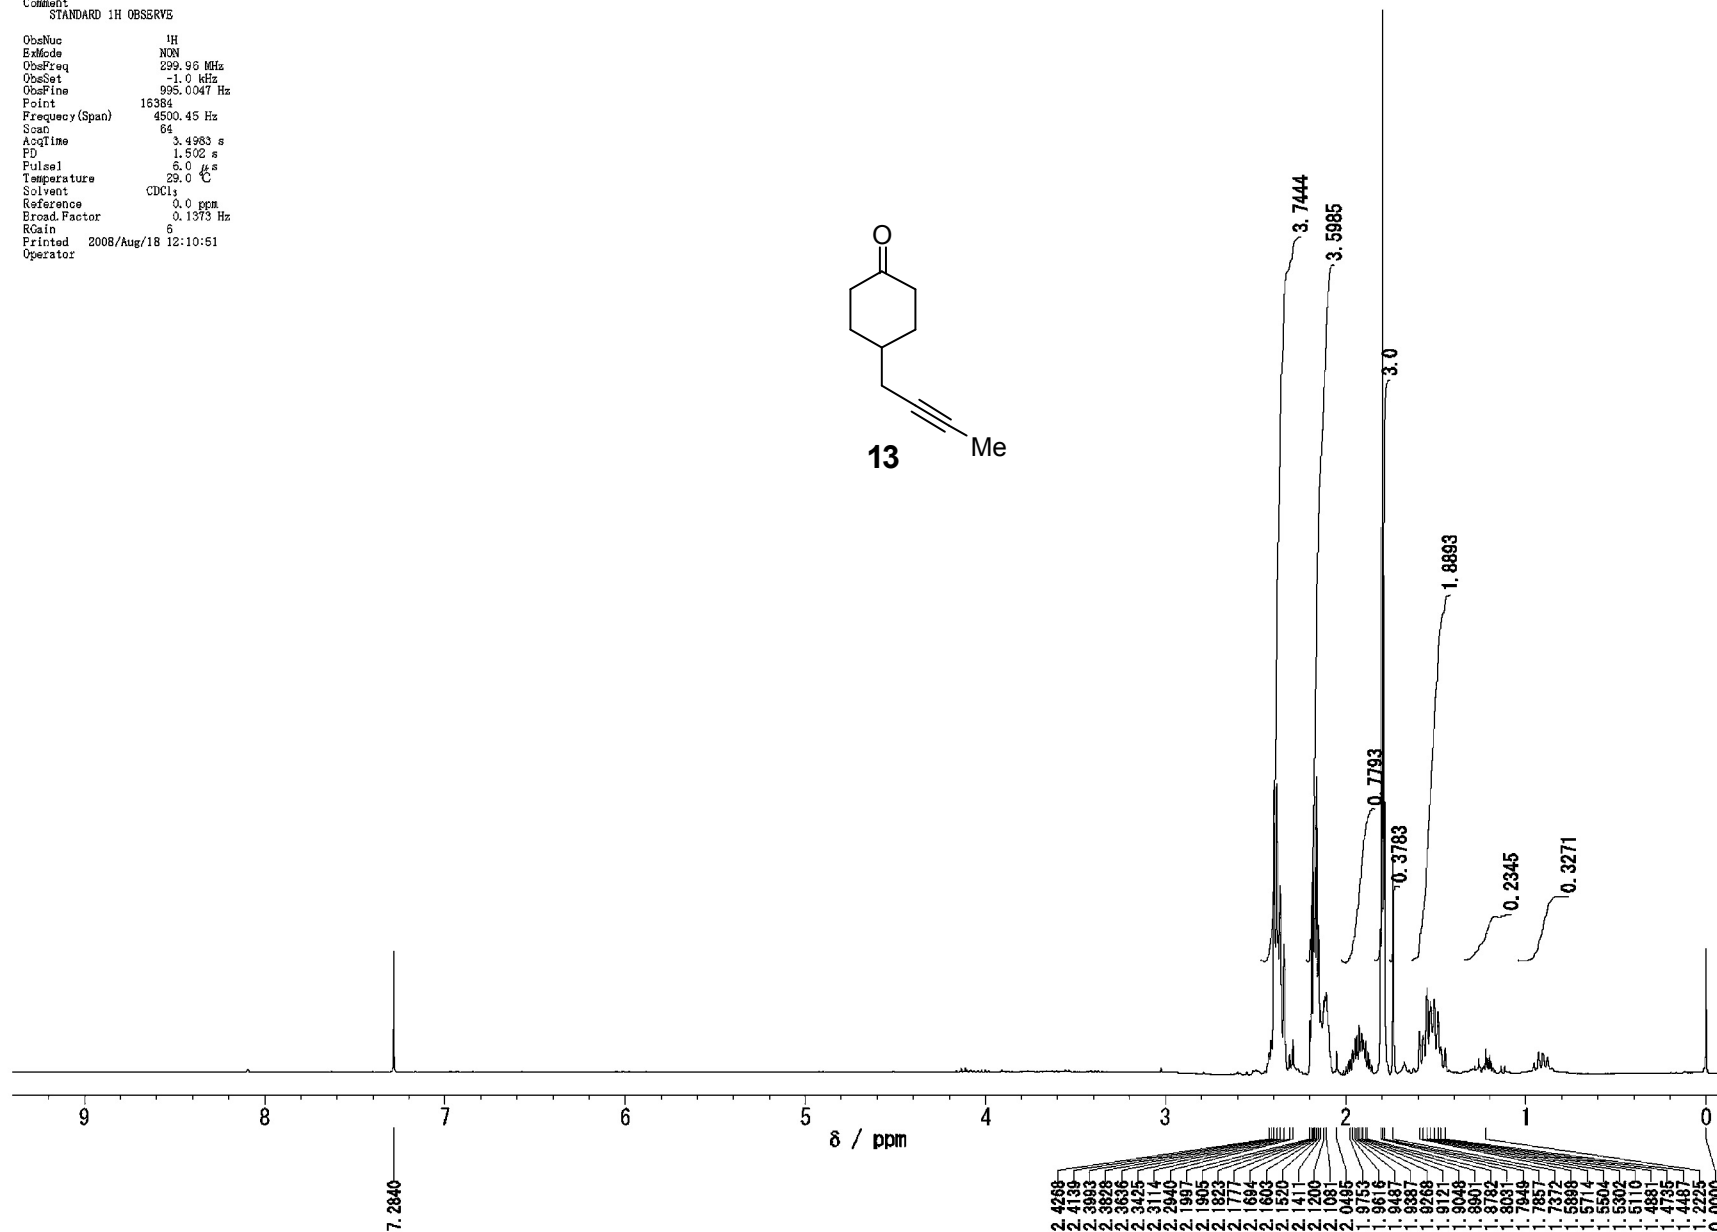

File C:\DOCUMENTS AND SETTINGS\北海道大学\NMR データ 06Q14\81D6TOWHID-3\PHID-3-57-58C-FR3-13C.FID\FID.ALS

Original File:

Date Aug 30 07

Comment

C13 Standard Observe  
Stick:none Tune=6.4 Match=0.4

ObsNuc <sup>13</sup>C  
ExMode NON  
ObsFreq 75.43 MHz  
ObsSet -1.0 kHz  
ObsFino 996.3672 Hz  
Point 65536  
Frequency (Span) 22829.23 Hz  
Scan 1024  
AcqTime 1.4989 s  
PD 1.501 s  
Pulse1 6.0  $\mu$ s  
Temperature 29.0  $^{\circ}$ C  
Solvent CDCl<sub>3</sub>  
Reference 77.0 ppm  
Broad.Factor 0.1726 Hz  
RGain 30  
Printed 2008/Aug/18 12:13:03  
Operator

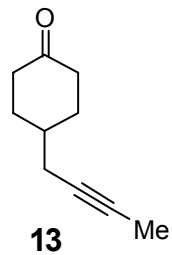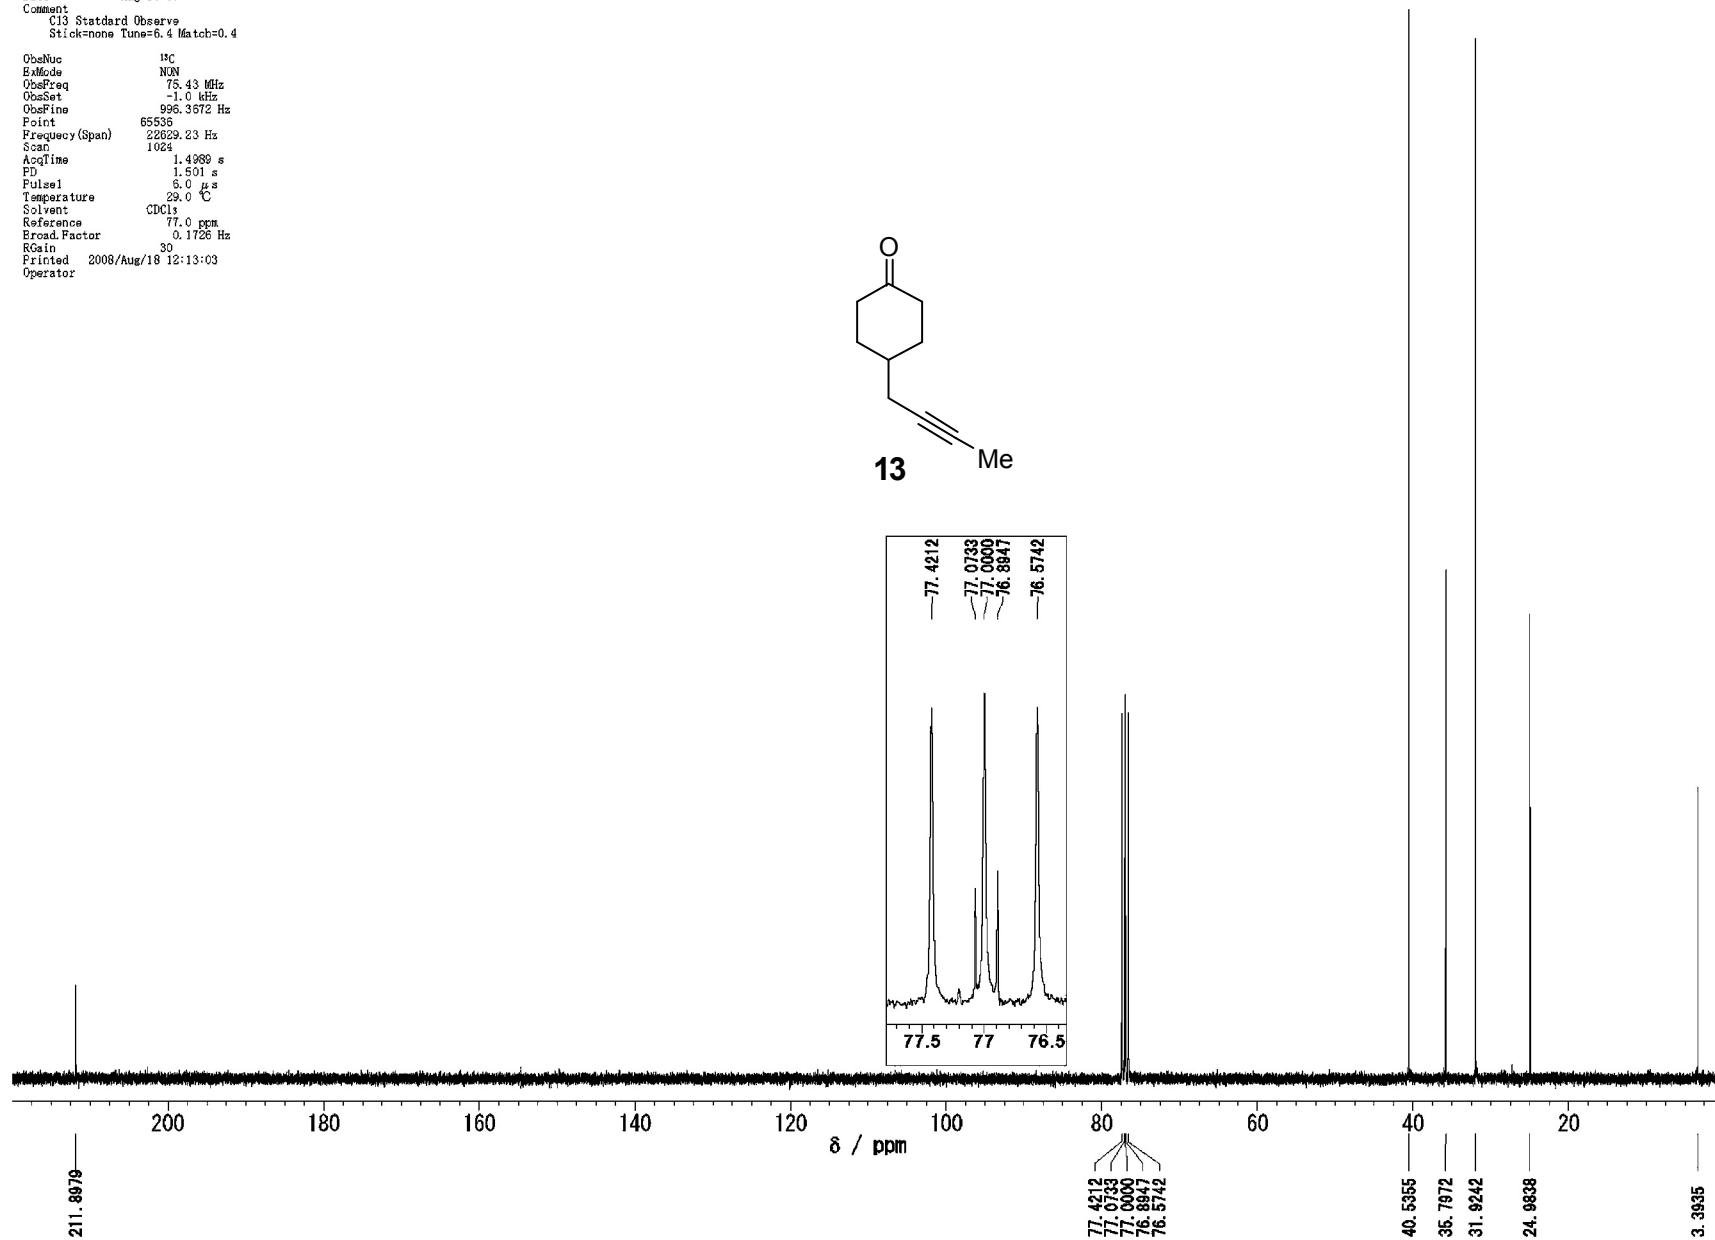

File C:\DOCUMENTS AND SETTINGS\北海道大学\NMR データ 06Q14\81D6TOWHD-3\WHD-3-538-PR1-1H.FID\FID.ALS

Original File:

Date Sep 1 07

Comment STANDARD 1H OBSERVE

ObsNuc 1H  
ExMode NON  
ObsFreq 299.96 MHz  
ObsSet -1.0 kHz  
ObsFine 995.0047 Hz  
Point 16384  
Frequency (Span) 4500.45 Hz  
Scan 64  
AcqTime 3.4983 s  
FD 1.502 s  
Pulse 6.0  $\mu$ s  
Temperature 29.0  $^{\circ}$ C  
Solvent CDCl<sub>3</sub>  
Reference 0.0 ppm  
Broad.Factor 0.1373 Hz  
RGain 18  
Printed 2008/Aug/18 20:55:45  
Operator

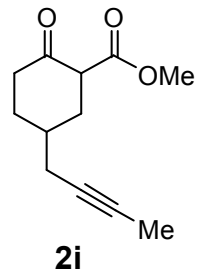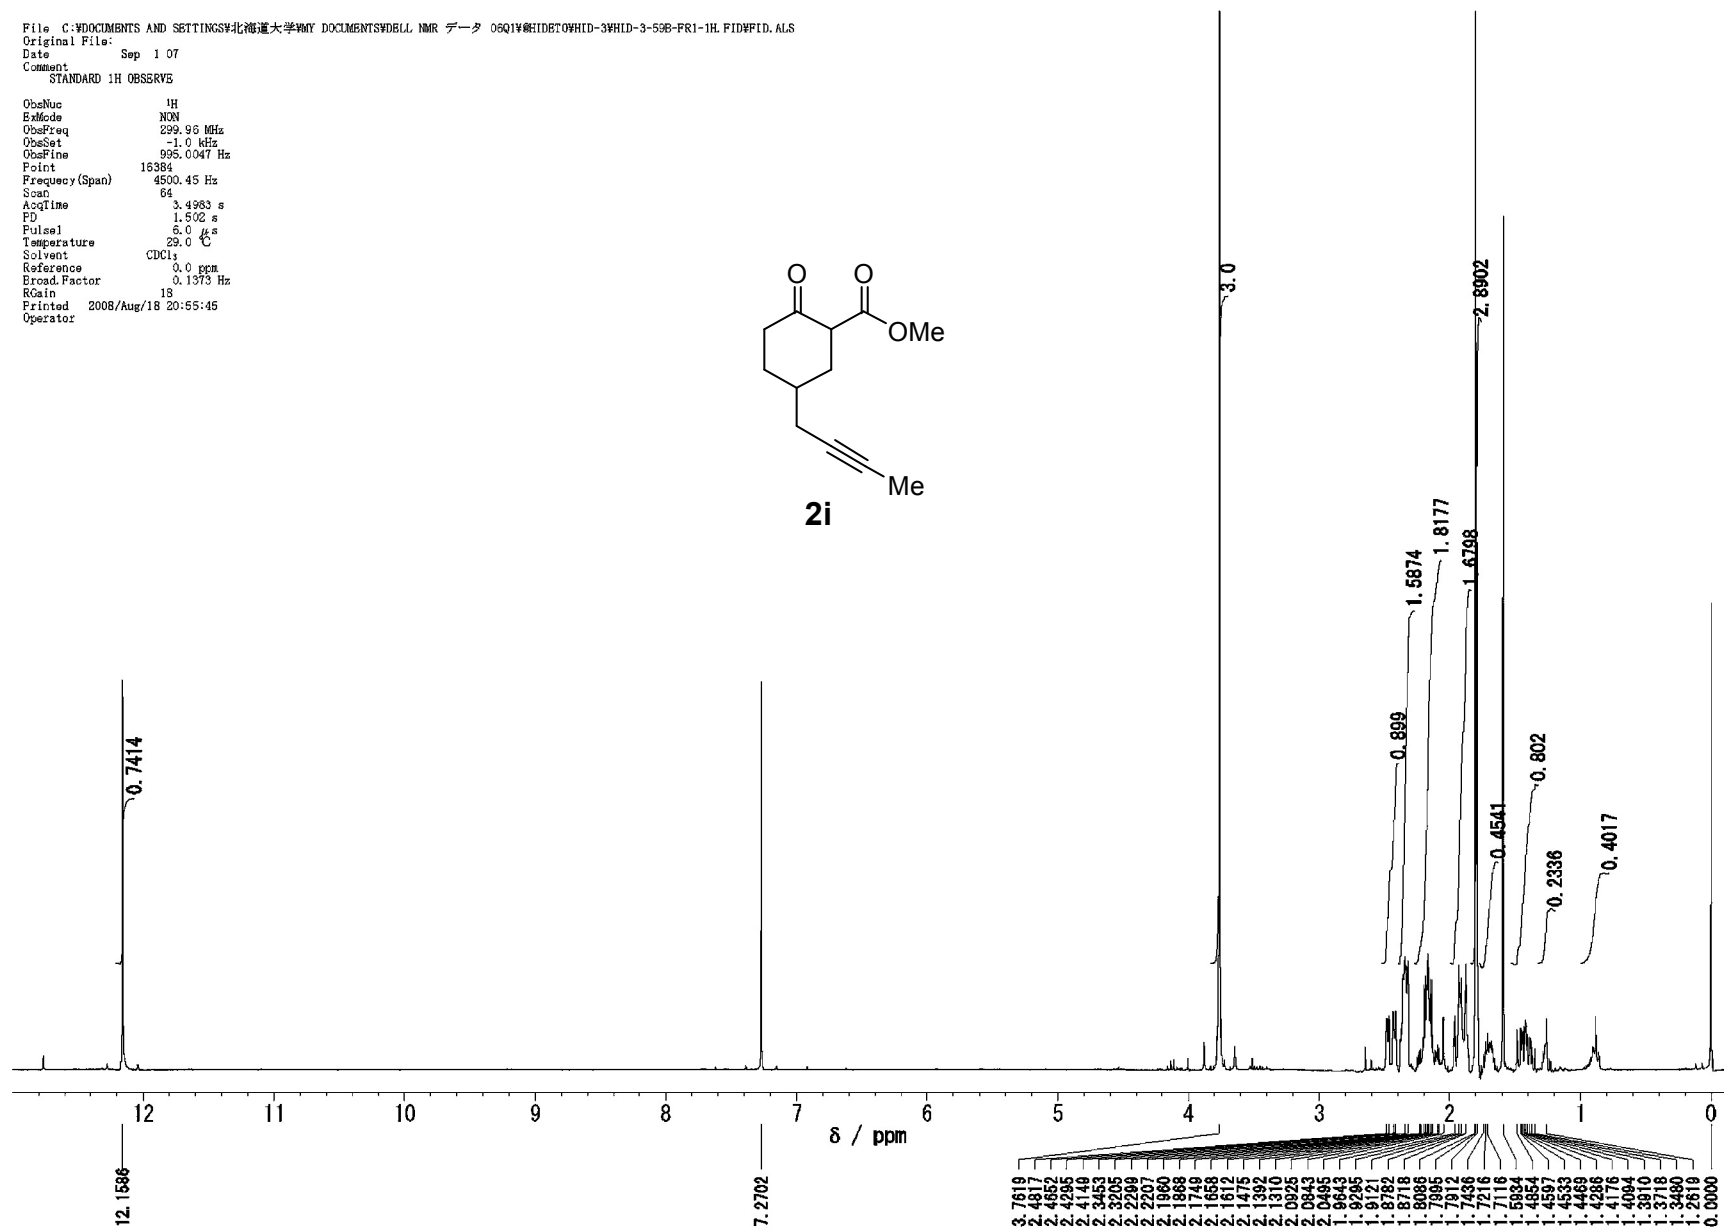

File C:\DOCUMENTS AND SETTINGS\北海道大学\NMR データ 06Q14\81D6T0WHD-3\WHD-3-59C-13C.FID\FID.ALS  
 Original File:  
 Date Sep 1 07  
 Comment C13 Standard Observe  
 Stick:none Tune=6.4 Match=0.4

ObsNuc <sup>13</sup>C  
 ExMode NON  
 ObsFreq 75.43 MHz  
 ObsSet -1.0 kHz  
 ObsPine 996.3672 Hz  
 Point 65536  
 Frequency (Span) 22829.23 Hz  
 Scan 1216  
 AcqTime 1.4989 s  
 PD 1.501 s  
 Pulse1 6.0  $\mu$ s  
 Temperature 29.0  $^{\circ}$ C  
 Solvent CDCl<sub>3</sub>  
 Reference 77.0 ppm  
 Broad.Factor 0.1726 Hz  
 RGain 30  
 Printed 2008/Aug/18 20:58:43  
 Operator

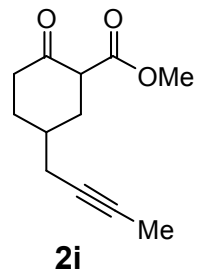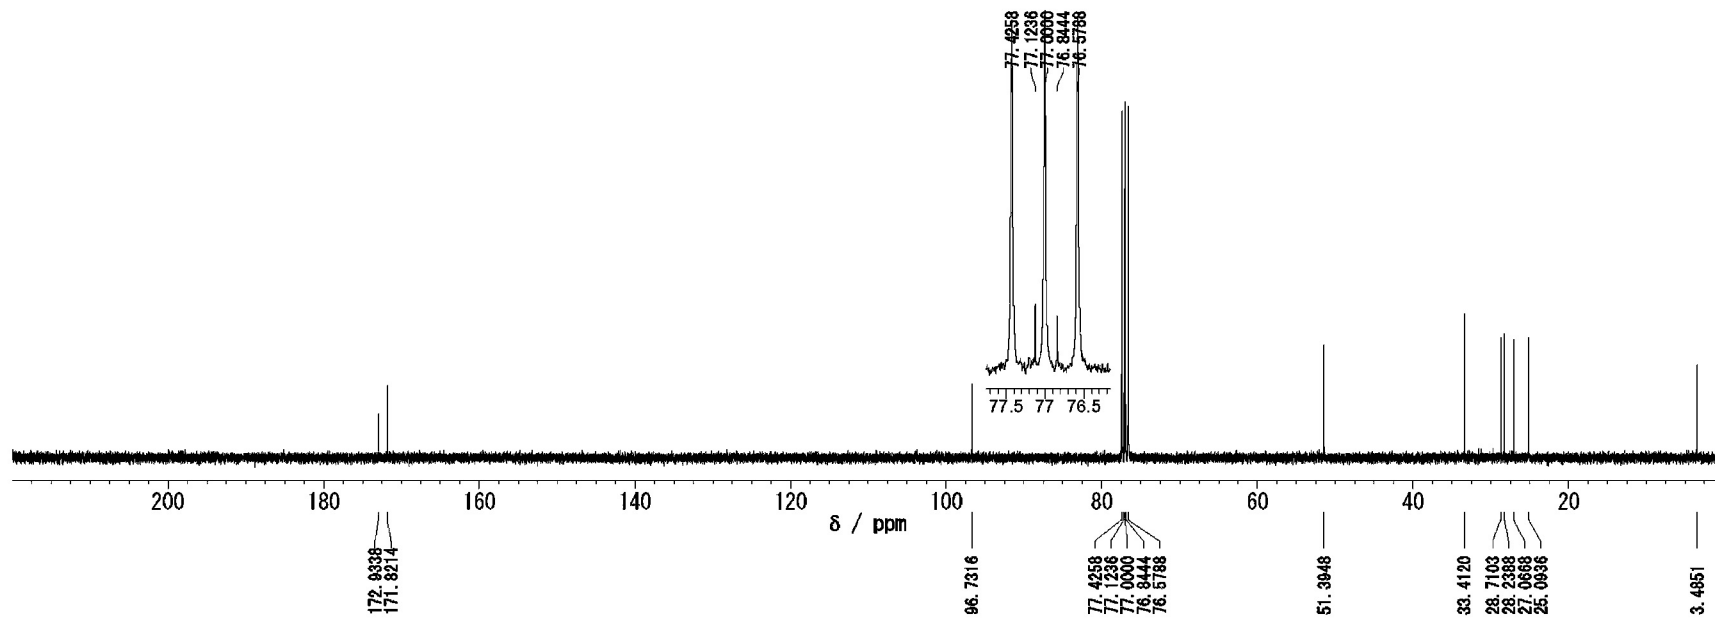

File C:\DOCUMENTS AND SETTINGS\北海道大学\NMR データ 06Q14\8HIDBTOWHID-3\HID-3-107A-FR1.PID\FID.ALS

Original File:  
Date Nov 12 07

Comment  
STANDARD 1H OBSERVE

ObsNuc 1H  
ExMode NON  
ObsFreq 299.96 MHz  
ObsSet -1.0 kHz  
ObsFine 995.0047 Hz  
Point 16384  
Frequency (Span) 4500.45 Hz  
Scan 32  
AcqTime 3.4983 s  
FD 1.502 s  
Pulse 6.0  $\mu$ s  
Temperature 29.0  $^{\circ}$ C  
Solvent CDCl<sub>3</sub>  
Reference 0.0 ppm  
Broad.Factor 0.1373 Hz  
RGain 18  
Printed 2008/Aug/26 21:46:20  
Operator

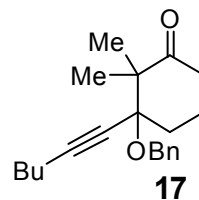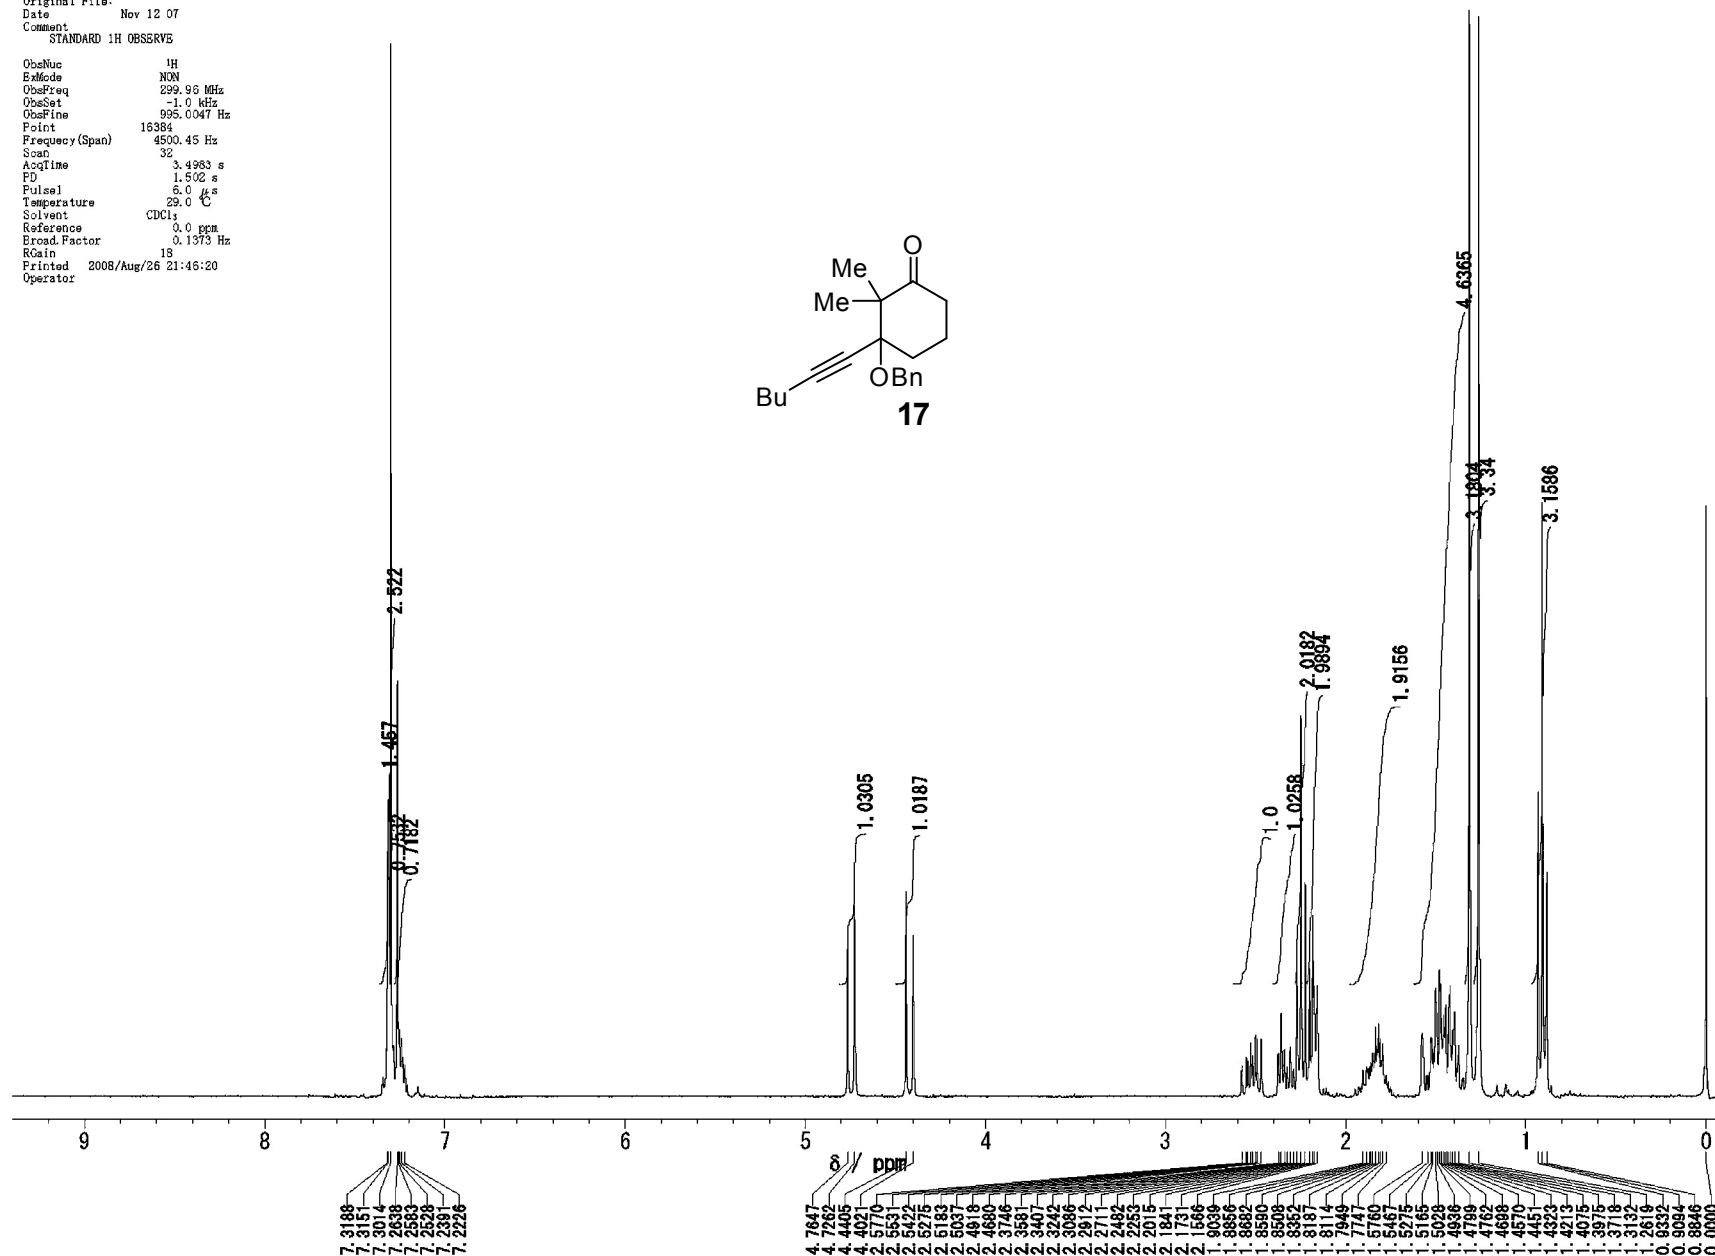

File C:\DOCUMENTS AND SETTINGS\北海道大学\NMR データ 06Q14\81D6TOWHID-3\HID-3-107E-FR1-13C.FID\FID.ALS

Original File:

Date Nov 12 07

Comment

C13 Standard Observe  
Stick:none Tune=6.4 Match=0.4

ObsNuc <sup>13</sup>C  
ExMode NON  
ObsFreq 75.43 MHz  
ObsSet -1.0 kHz  
ObsFino 996.3672 Hz  
Point 32768  
Frequency (Span) 18761.73 Hz  
Scan 640  
AcqTime 1.4992 s  
PD 1.501 s  
Pulse1 6.0 μs  
Temperature 29.0 °C  
Solvent CDCl<sub>3</sub>  
Reference 77.0 ppm  
Broad.Factor 0.2363 Hz  
RGain 30  
Printed 2008/Sep/01 11:10:21  
Operator

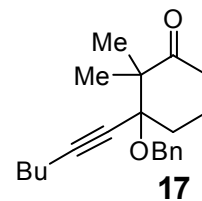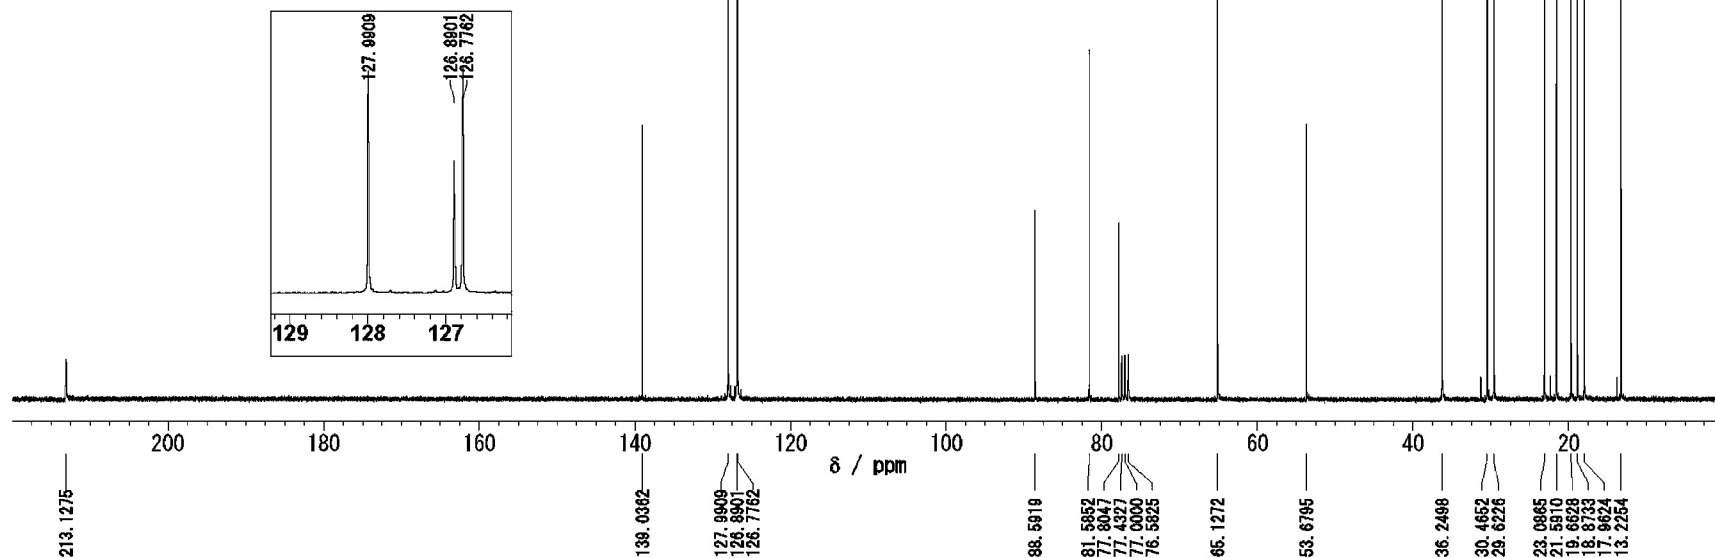

File C:\DOCUMENTS AND SETTINGS\北海道大学\MY DOCUMENTS\DELL NMR データ 06Q1\HIDETOWHID-3\HID-3-108B-FR6-1H.FID\FID.ALS  
 Original File:  
 Date Nov 20 07  
 Comment  
 STANDARD 1H OBSERVE

ObsNuc 1H  
 ExMode NON  
 ObsFreq 299.96 MHz  
 ObsRef 1.0 kHz  
 ObsPine 995.0047 Hz  
 Point 16384  
 Frequency (Span) 4500.45 Hz  
 Scan 64  
 AcqTime 3.4993 s  
 PD 1.502 s  
 Pulsol 6.0  $\mu$ s  
 Temperature 29.0  $^{\circ}$ C  
 Solvent CDCl<sub>3</sub>  
 Reference 0.0 ppm  
 Broad.Factor 0.1373 Hz  
 RGain 6  
 Printed 2008/Aug/26 21:41:35  
 Operator

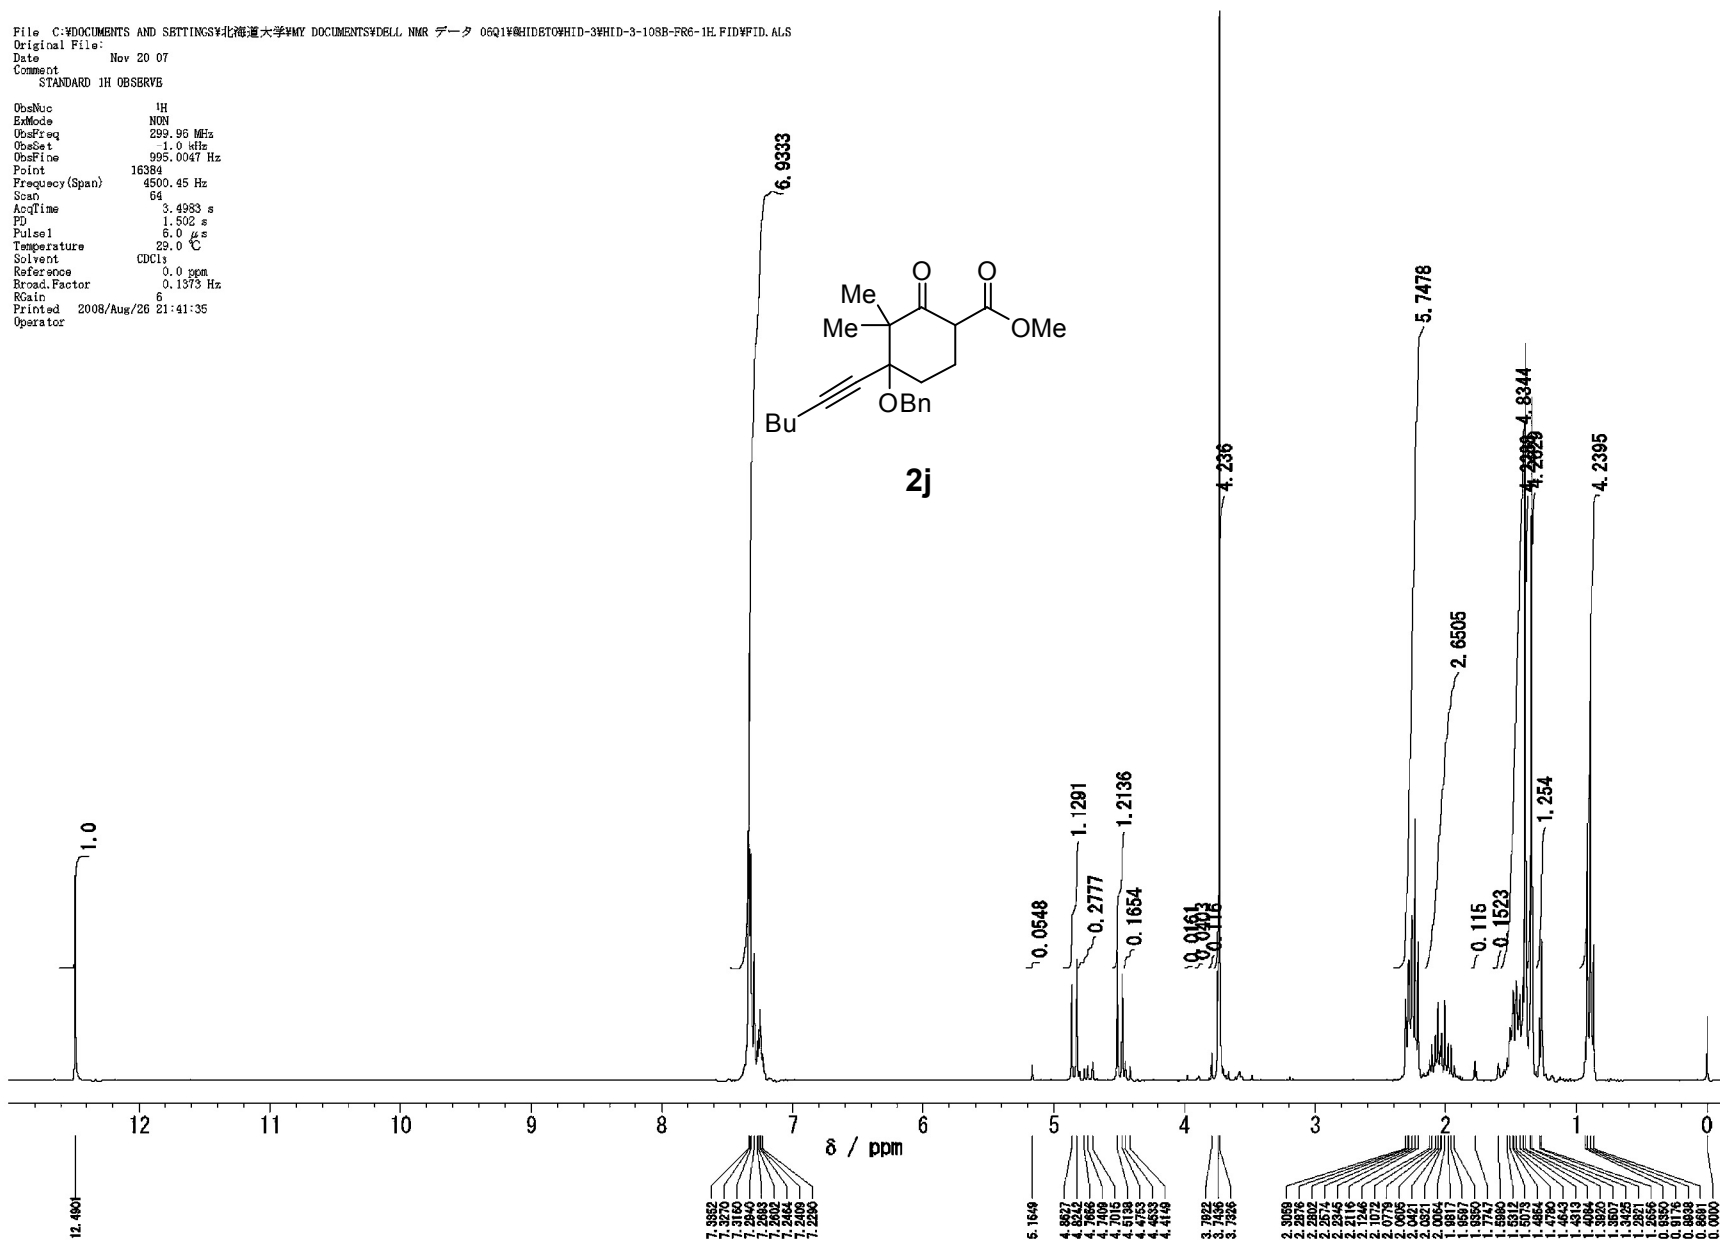



File C:\DOCUMENTS AND SETTINGS\北海道大学\MY DOCUMENTS\DELL NMR データ 06Q1\HIDETOWHID-3\HID-3-10SC-FRG-13C-BS8.FID\FID.ALS

Original File: Nov 20 07

Date

Comment

C13 Standard Observe

Stick:none Tune=6.4 Match=0.4

ObsNuc 13C  
ExMode NON  
ObsFreq 75.43 MHz  
ObsSet -1.0 kHz  
ObsPine 996.3672 Hz  
Point 32768  
Frequency (Span) 18761.73 Hz  
Scan 512  
AcqTime 1.4992 s  
PD 1.501 s  
Pulse1 6.0  $\mu$ s  
Temperature 29.0  $^{\circ}$ C  
Solvent CDCl<sub>3</sub>  
Reference 77.0 ppm  
Broad.Factor 0.2863 Hz  
RGain 30  
Printed 2008/Aug/26 21:43:44  
Operator

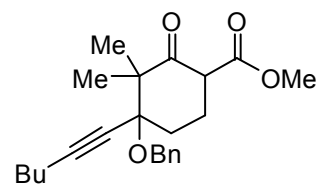

2j

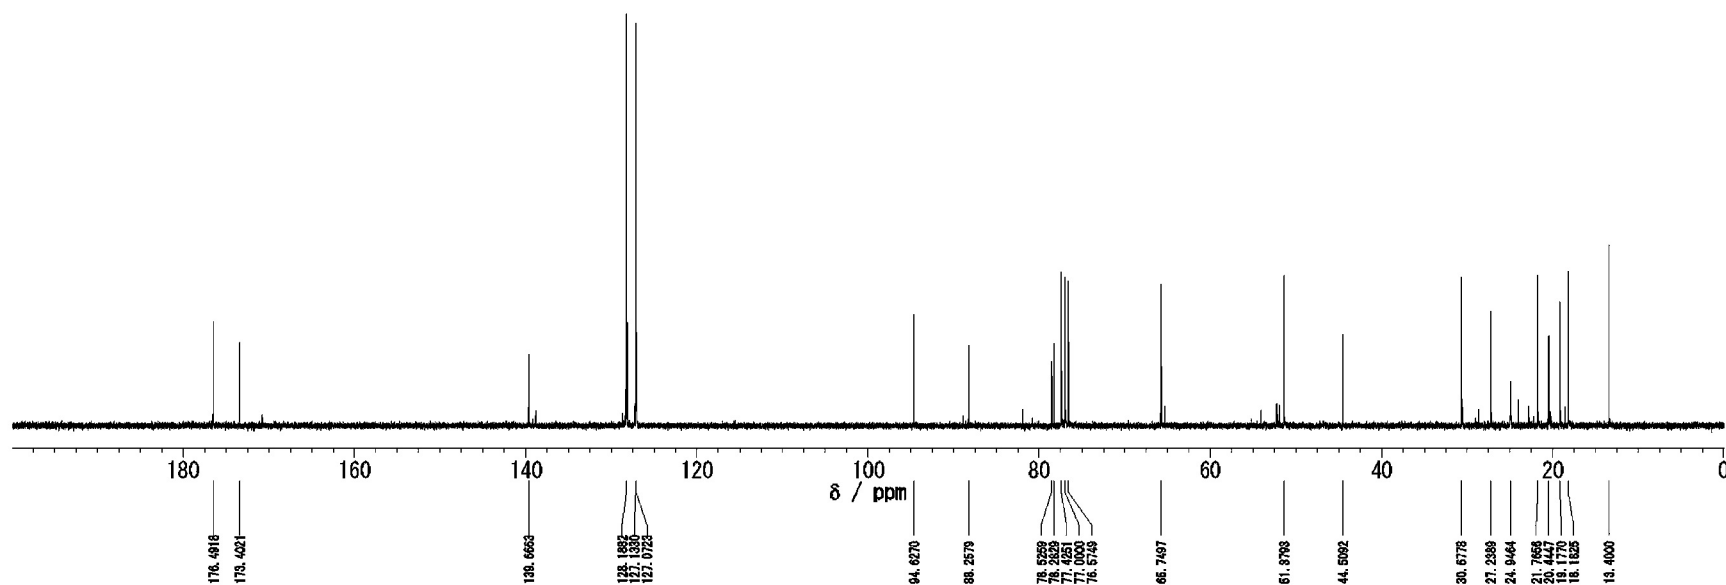

File C:\DOCUMENTS AND SETTINGS\北海道大学\NMR データ 06Q14\HIDBTOWHID-5-42C-FR1-1H.FID\FID.ALS  
 Original File:  
 Date Jul 30 08  
 Comment  
 STANDARD 1H OBSERVE

ObsNuc 1H  
 ExMode NON  
 ObsFreq 299.96 MHz  
 ObsSet -1.0 kHz  
 ObsFine 995.0047 Hz  
 Point 16384  
 Frequency (Span) 4500.45 Hz  
 Scan 32  
 AcqTime 3.4983 s  
 PD 1.502 s  
 Pulse 6.0  $\mu$ s  
 Temperature 29.0  $^{\circ}$ C  
 Solvent CDCl<sub>3</sub>  
 Reference 0.0 ppm  
 Broad.Factor 0.1373 Hz  
 SGain 6  
 Printed 2008/Aug/18 11:11:36  
 Operator

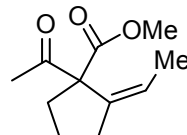

3a

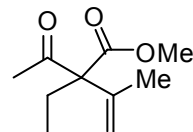

4a

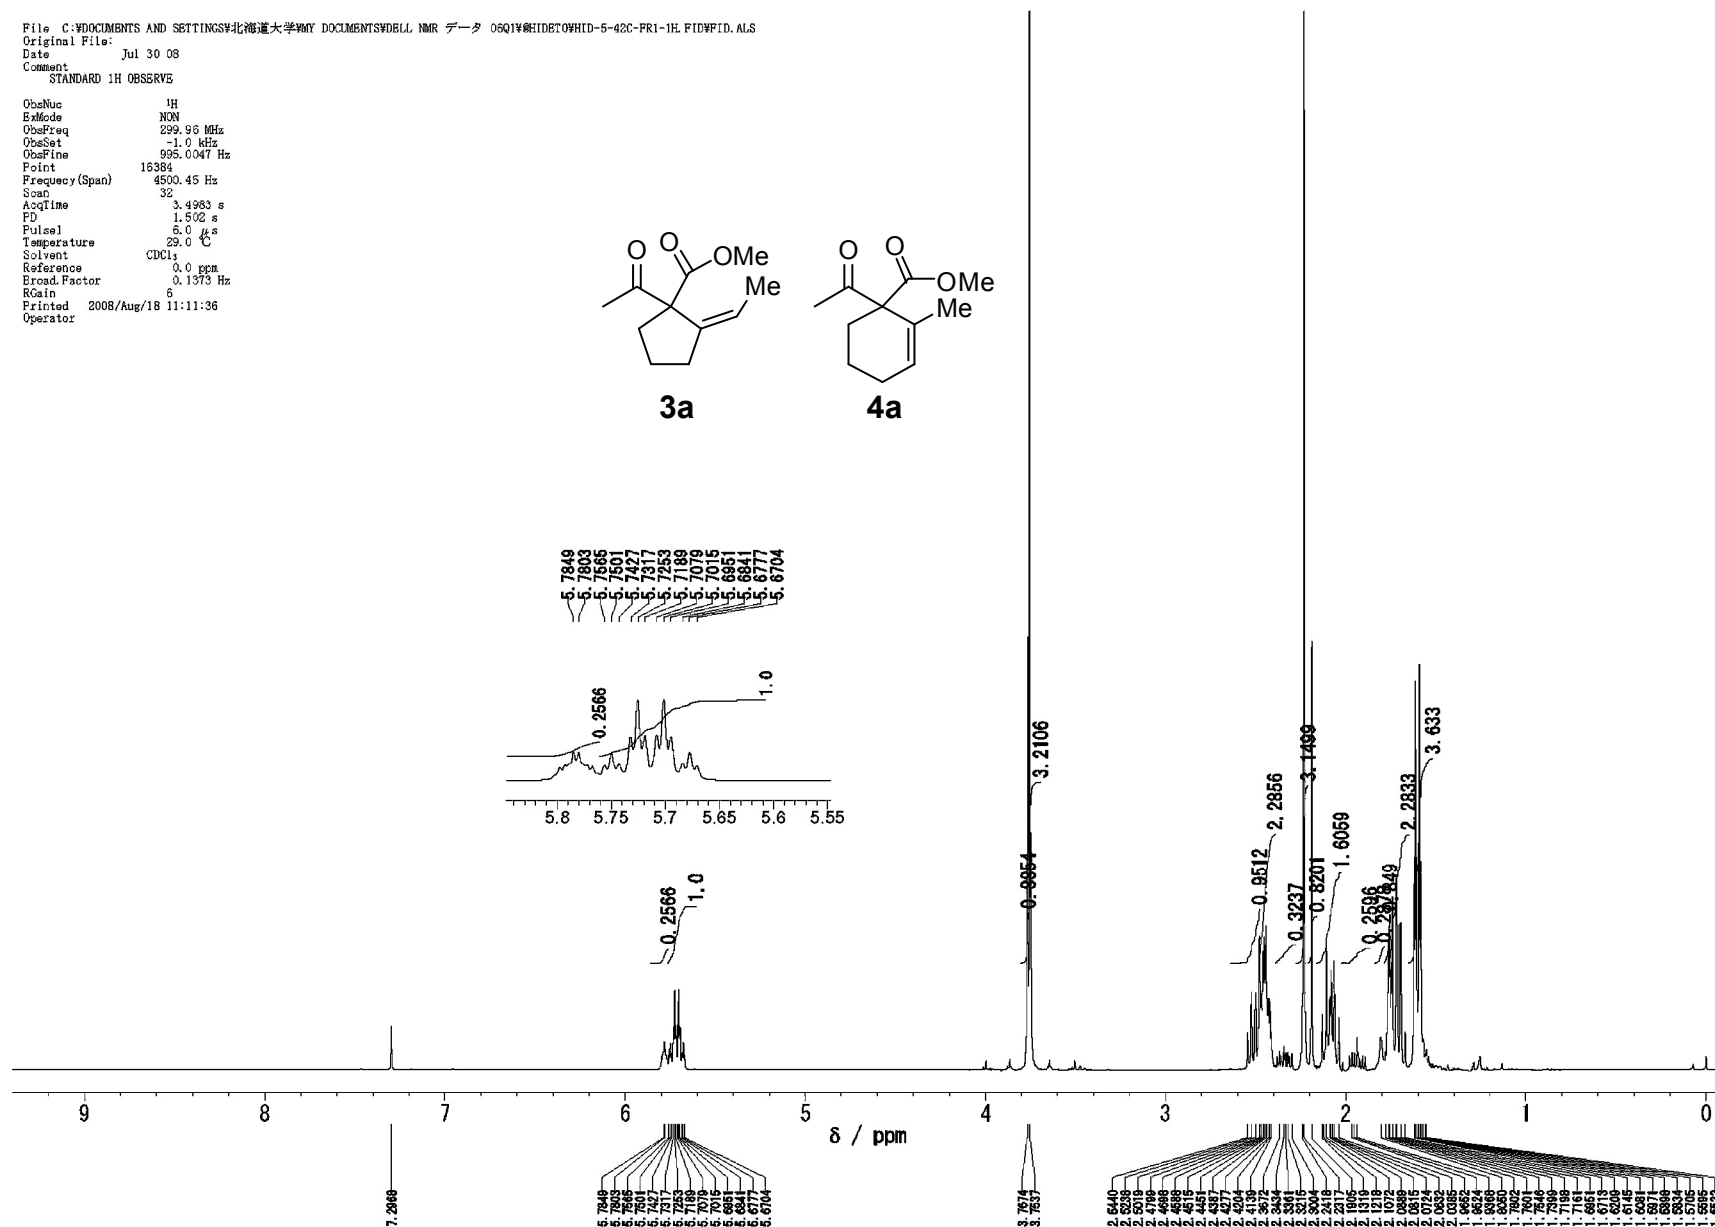

File C:\DOCUMENTS AND SETTINGS\北海道大学\NMR データ 06Q14\06Q14IDBTOWHID-5-42D-13C.FID\FID.ALS

Original File:

Date Jul 30 08

Comment

C13 Standard Observe  
Stick:none Tune=6.4 Match=0.4

ObsNuc <sup>13</sup>C  
ExMode NON  
ObsFreq 75.43 MHz  
ObsSet -1.0 kHz  
ObsFino 996.3672 Hz  
Point 32768  
Frequency (Span) 18761.73 Hz  
Scan 10048  
AcqTime 1.4992 s  
PD 1.501 s  
Pulse1 6.0 μs  
Temperature 29.0 °C  
Solvent CDCl<sub>3</sub>  
Reference 77.0 ppm  
Broad.Factor 0.2363 Hz  
RGain 30  
Printed 2008/Aug/18 11:16:59  
Operator

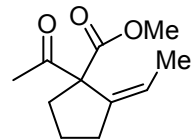

3a

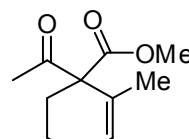

4a

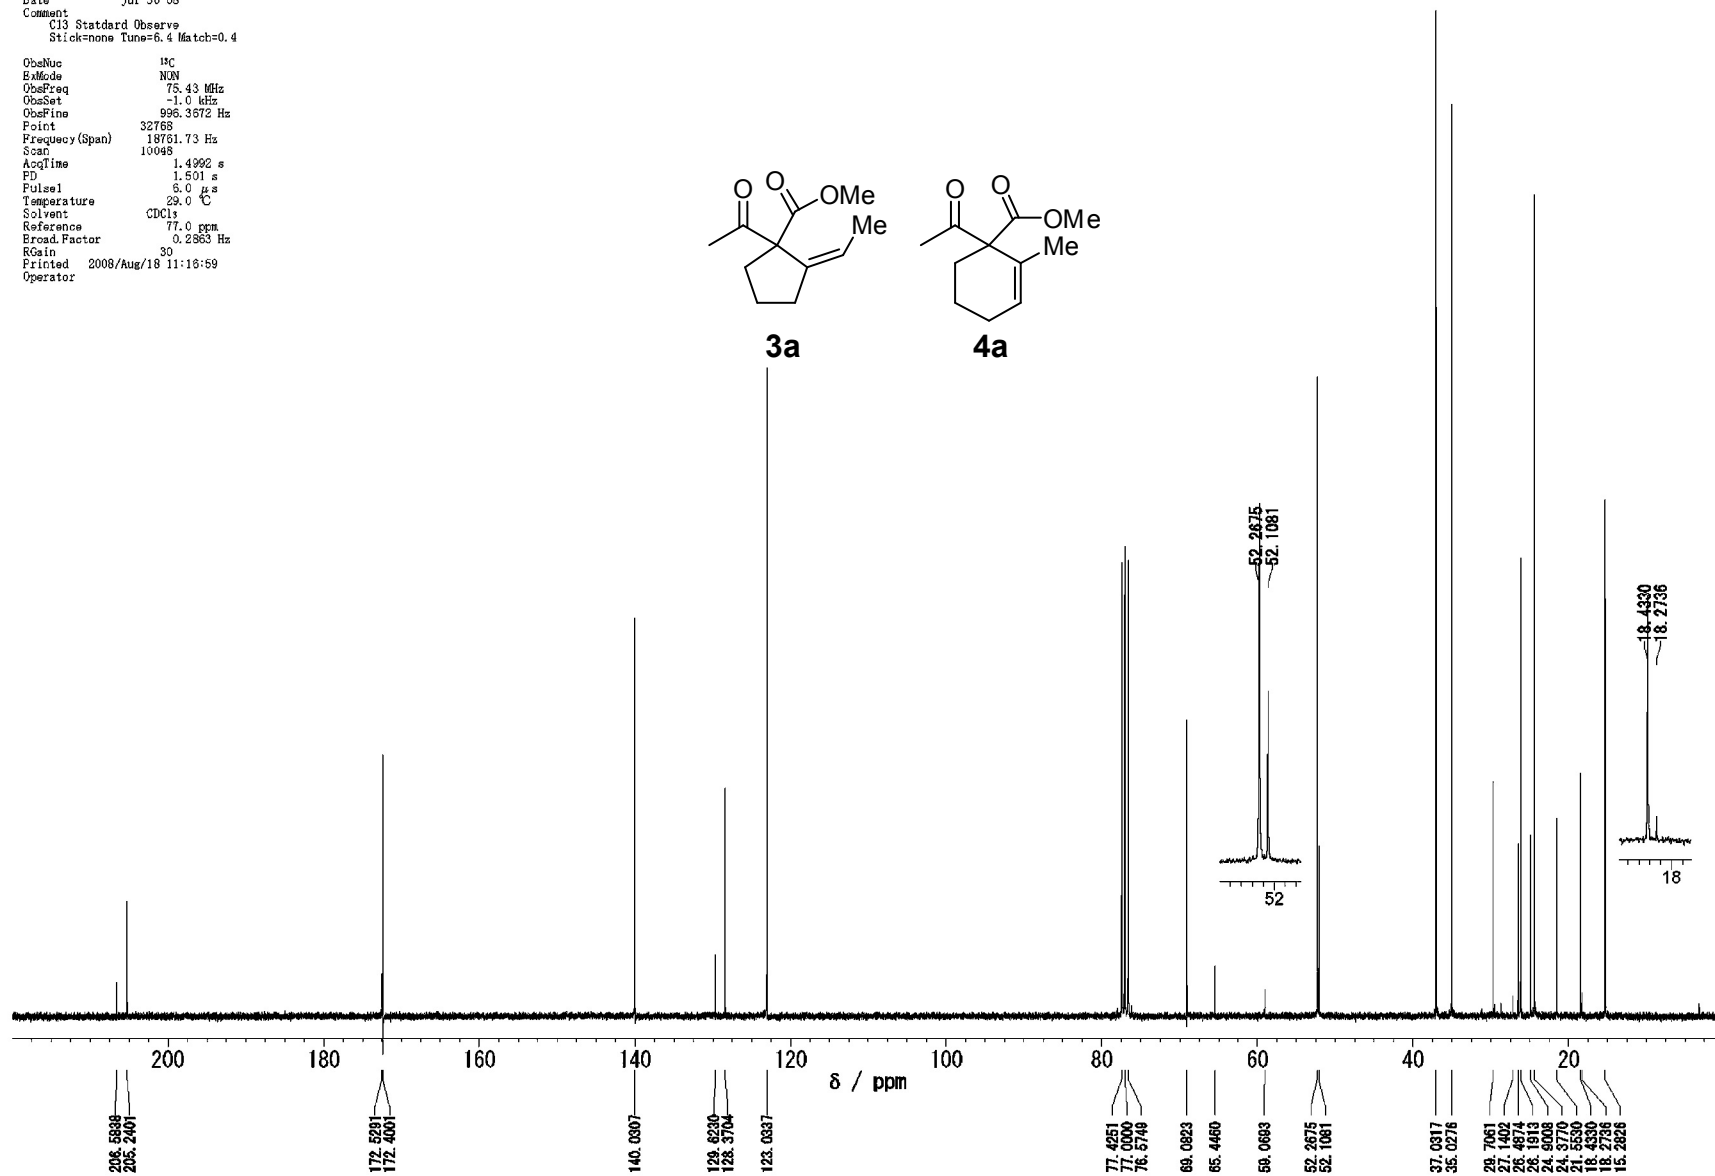

File C:\DOCUMENTS AND SETTINGS  
 北海道大学\MY DOCUMENTS\DELL  
 NMR データ 06Q1V8HIDETOWHID  
 -5-59C-1H.FID\FID.ALS  
 Original File:  
 Date Aug 1 08  
 Comment  
 STANDARD 1H OBSERVE

ObsNuc 1H  
 ExpMode NON  
 ObsFreq 299.96 MHz  
 ObsSet -1.0 kHz  
 ObsPine 995.0047 Hz

Point 16384  
 Frequency (Span) 4500.45 Hz  
 Scan 32  
 AcqTime 3.4983 s  
 PD 1.502 s  
 Pulse 6.0  $\mu$ s  
 Temperature 29.0  $^{\circ}$ C  
 Solvent CDCl<sub>3</sub>  
 Reference 0.0 ppm  
 Broad Factor 0.1373 Hz

RGain 1  
 Printed 2008/Aug/18 11:20:22  
 Operator

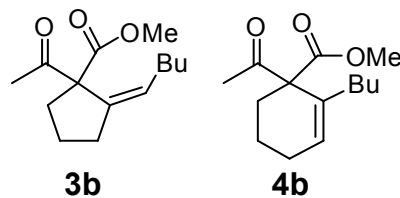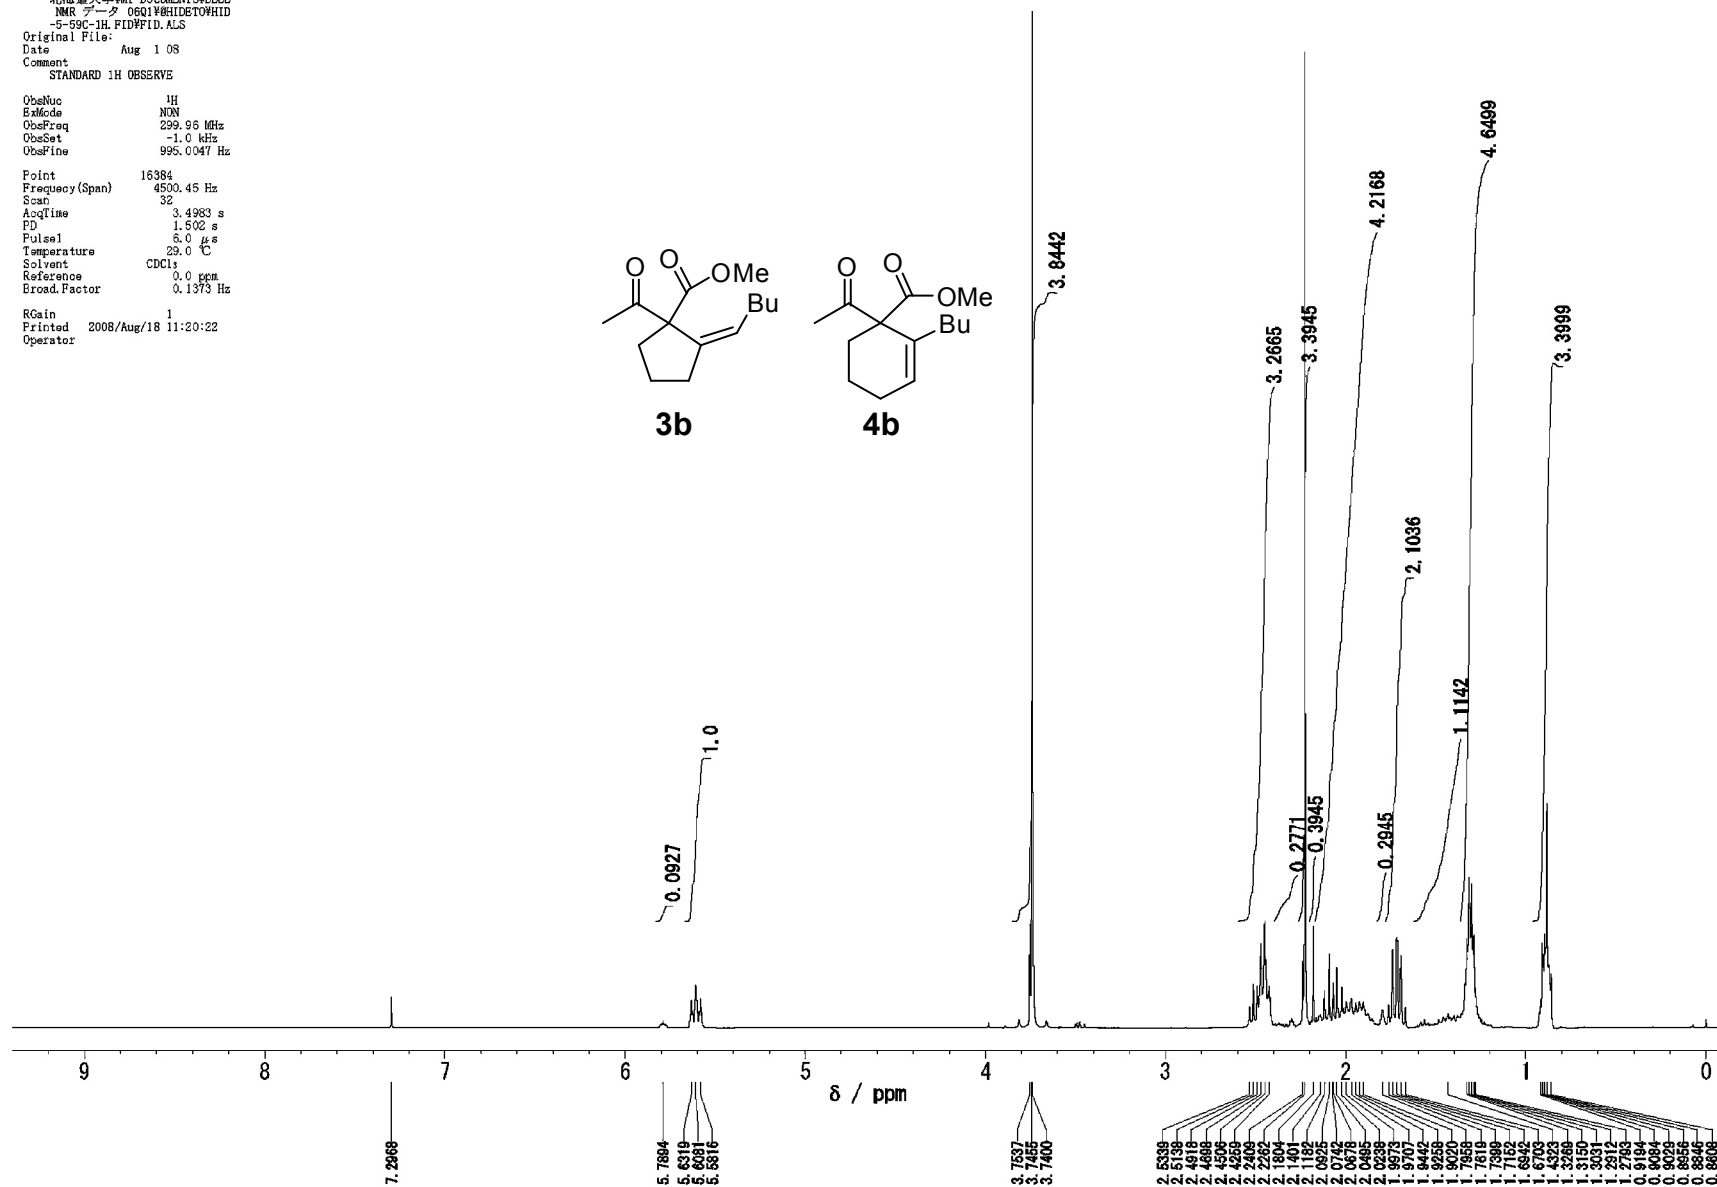

File C:\DOCUMENTS AND SETTINGS\北  
 北海道大学\MY DOCUMENTS\DELL  
 NMRデータ 06Q1\48HIDETOWHID  
 -5-59D-13C.FID\FID.ALS  
 Original File:  
 Date Jul 31 08  
 Comment  
 C13 Standard Observe  
 Stick=none Tune=6.4 Match=0.  
 4

ObsNucl 13C  
 ExMode NON  
 ObsFreq 75.43 MHz  
 ObsSet -1.0 MHz  
 ObsPine 996.3672 Hz

Point 32768  
 Frequency (Span) 18761.73 Hz  
 Scan 10944  
 AcqTime 1.4992 s  
 PD 1.501 s  
 Pulse1 6.0  $\mu$ s  
 Temperature 29.0  $^{\circ}$ C  
 Solvent CDCl<sub>3</sub>  
 Reference 77.0 ppm  
 Broad Factor 0.2863 Hz

RGain 30  
 Printed 2008/Aug/18 11:23:47  
 Operator

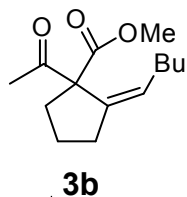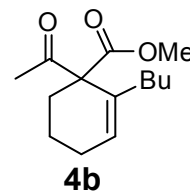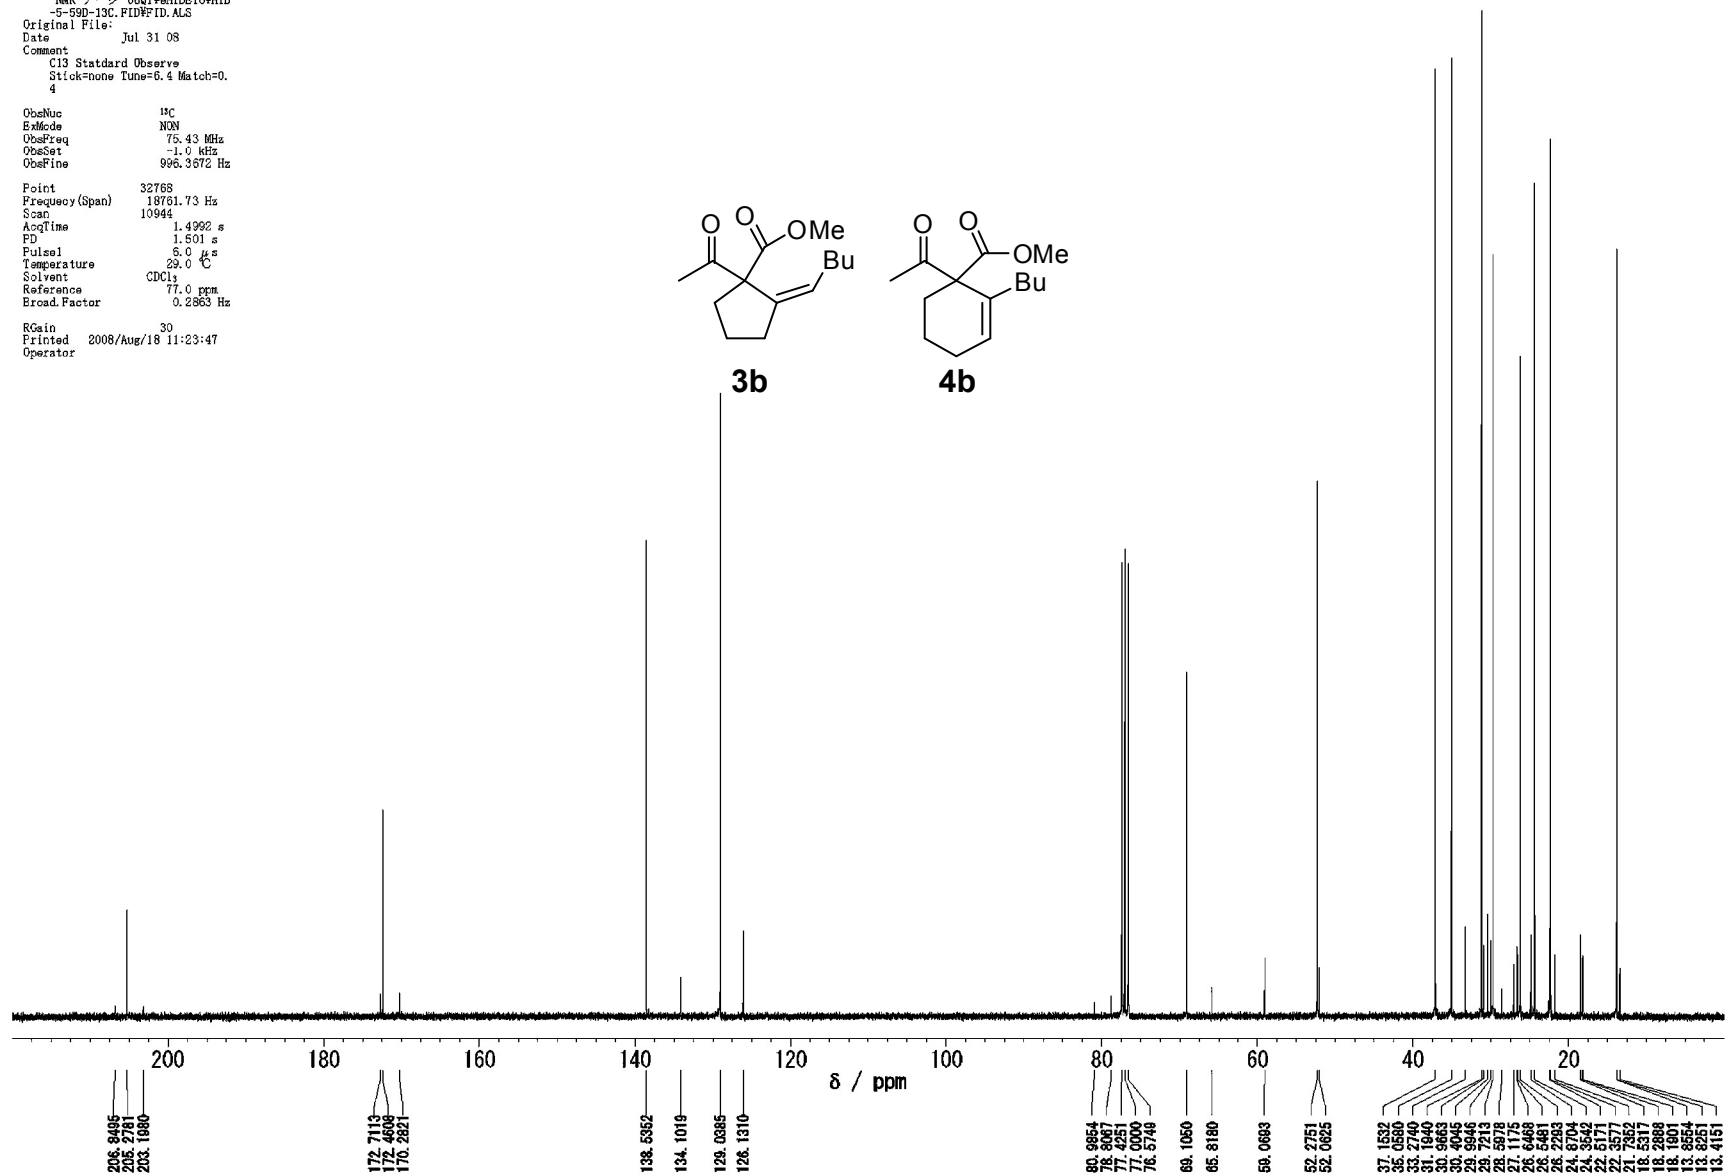

File: C:\DOCUMENTS AND SETTINGS\北海道大学\MY DOCUMENTS\DELL NMR データ 06Q1\06HID\06HID-6-07A-FR1.FID\FID  
 Original File: C:\DOCUMENTS AND SETTINGS\北海道大学\MY DOCUMENTS\DELL NMR データ 06Q1\06HID\06HID-6-07A-FR1.FID\FID  
 Date Sep 1 08  
 Comment STANDARD 1H CDSERVE

Obelixus 1H  
 ExMode  
 ObsFreq 299.96 MHz  
 ObsSet -1.0 kHz  
 ObsPine 995.0047 Hz  
 Point 16384  
 Frequency(Span) 4500.45 Hz  
 Scan 32  
 AcqTime 3.4983 s  
 PD 1.502 s  
 Pulse 6.0 μs  
 Temperature 29.0 °C  
 Solvent CDCl<sub>3</sub>  
 Reference 0.0 ppm  
 Broad Factor 0.25 Hz  
 RGain 6  
 Printed 2008/Sep/01 09:43:18  
 Operator

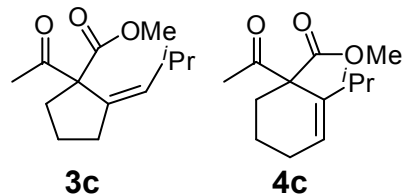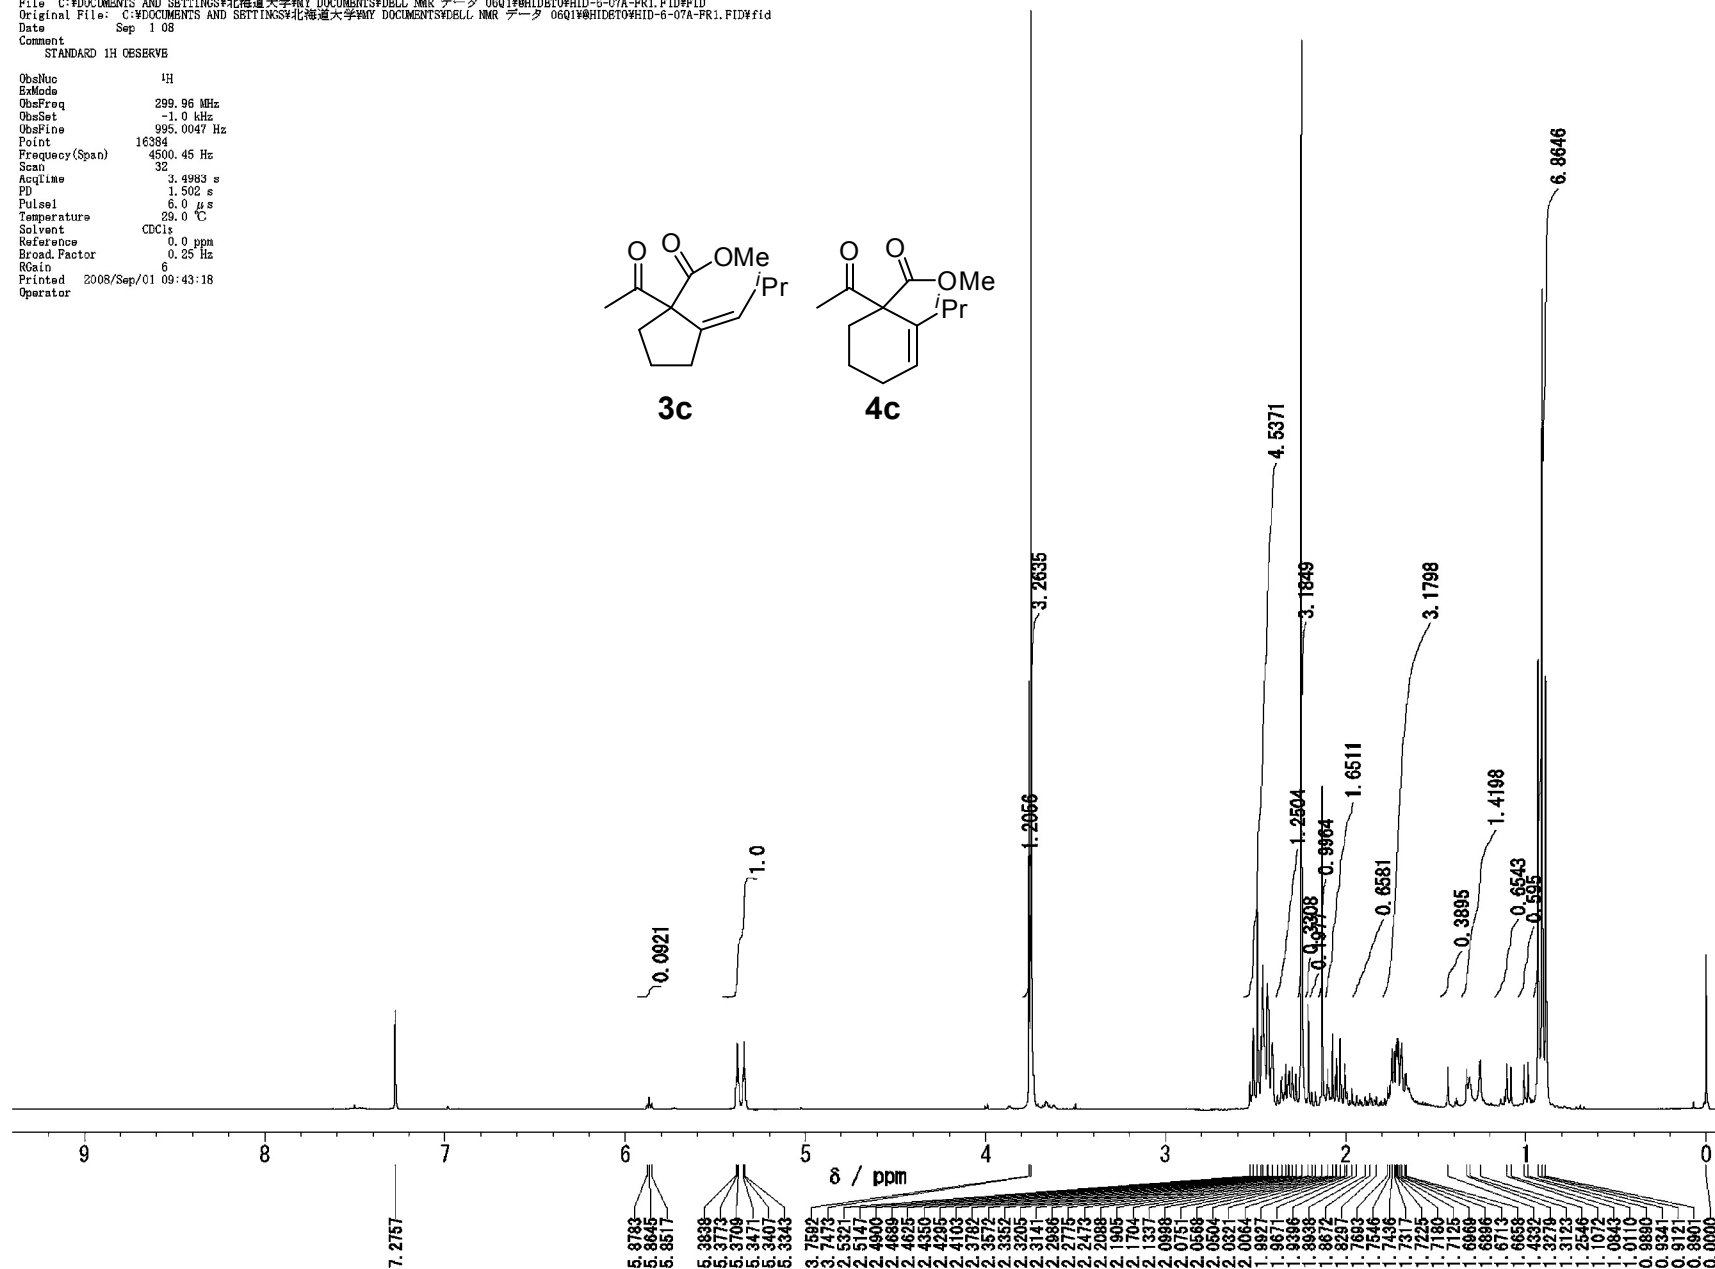

File: C:\DOCUMENTS AND SETTINGS\北海道大学\Y  
 Y DOCUMENTS\DELL NMR データ 0601\BHIDETO  
 WHID-6-07D-GPC-13C.FID\WID.ALS  
 Original File: C:\DOCUMENTS AND SETTINGS\北  
 海道大学\YMY DOCUMENTS\DELL NMR データ 06  
 Q1\BHIDETO\WHID-6-07D-GPC-13C.FID\fid  
 Date Sep 2 08  
 Comment  
 C13 Statdard Observe  
 Stick:none Tune=6.4 Match=0.4  
 ObsNuc <sup>13</sup>C  
 ExMode NUN  
 ObsFreq 75.43 MHz  
 ObsSet -1.0 kHz  
 ObsFine 996.3672 Hz  
 Point 32788  
 Frequency(Span) 18761.73 Hz  
 Scan 1408  
 AcqTime 1.4992 s  
 PD 1.501 s  
 Pulse1 6.0 μs  
 Temperature 29.0 °C  
 Solvent CDCl<sub>3</sub>  
 Reference 77.0 ppm  
 Broad.Factor 0.25 Hz  
 Gain 30  
 Printed 2008/Sep/02 18:17:04  
 Operator

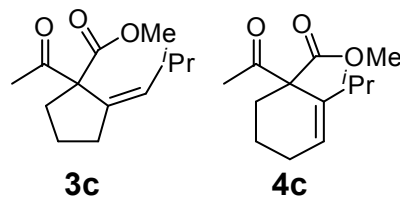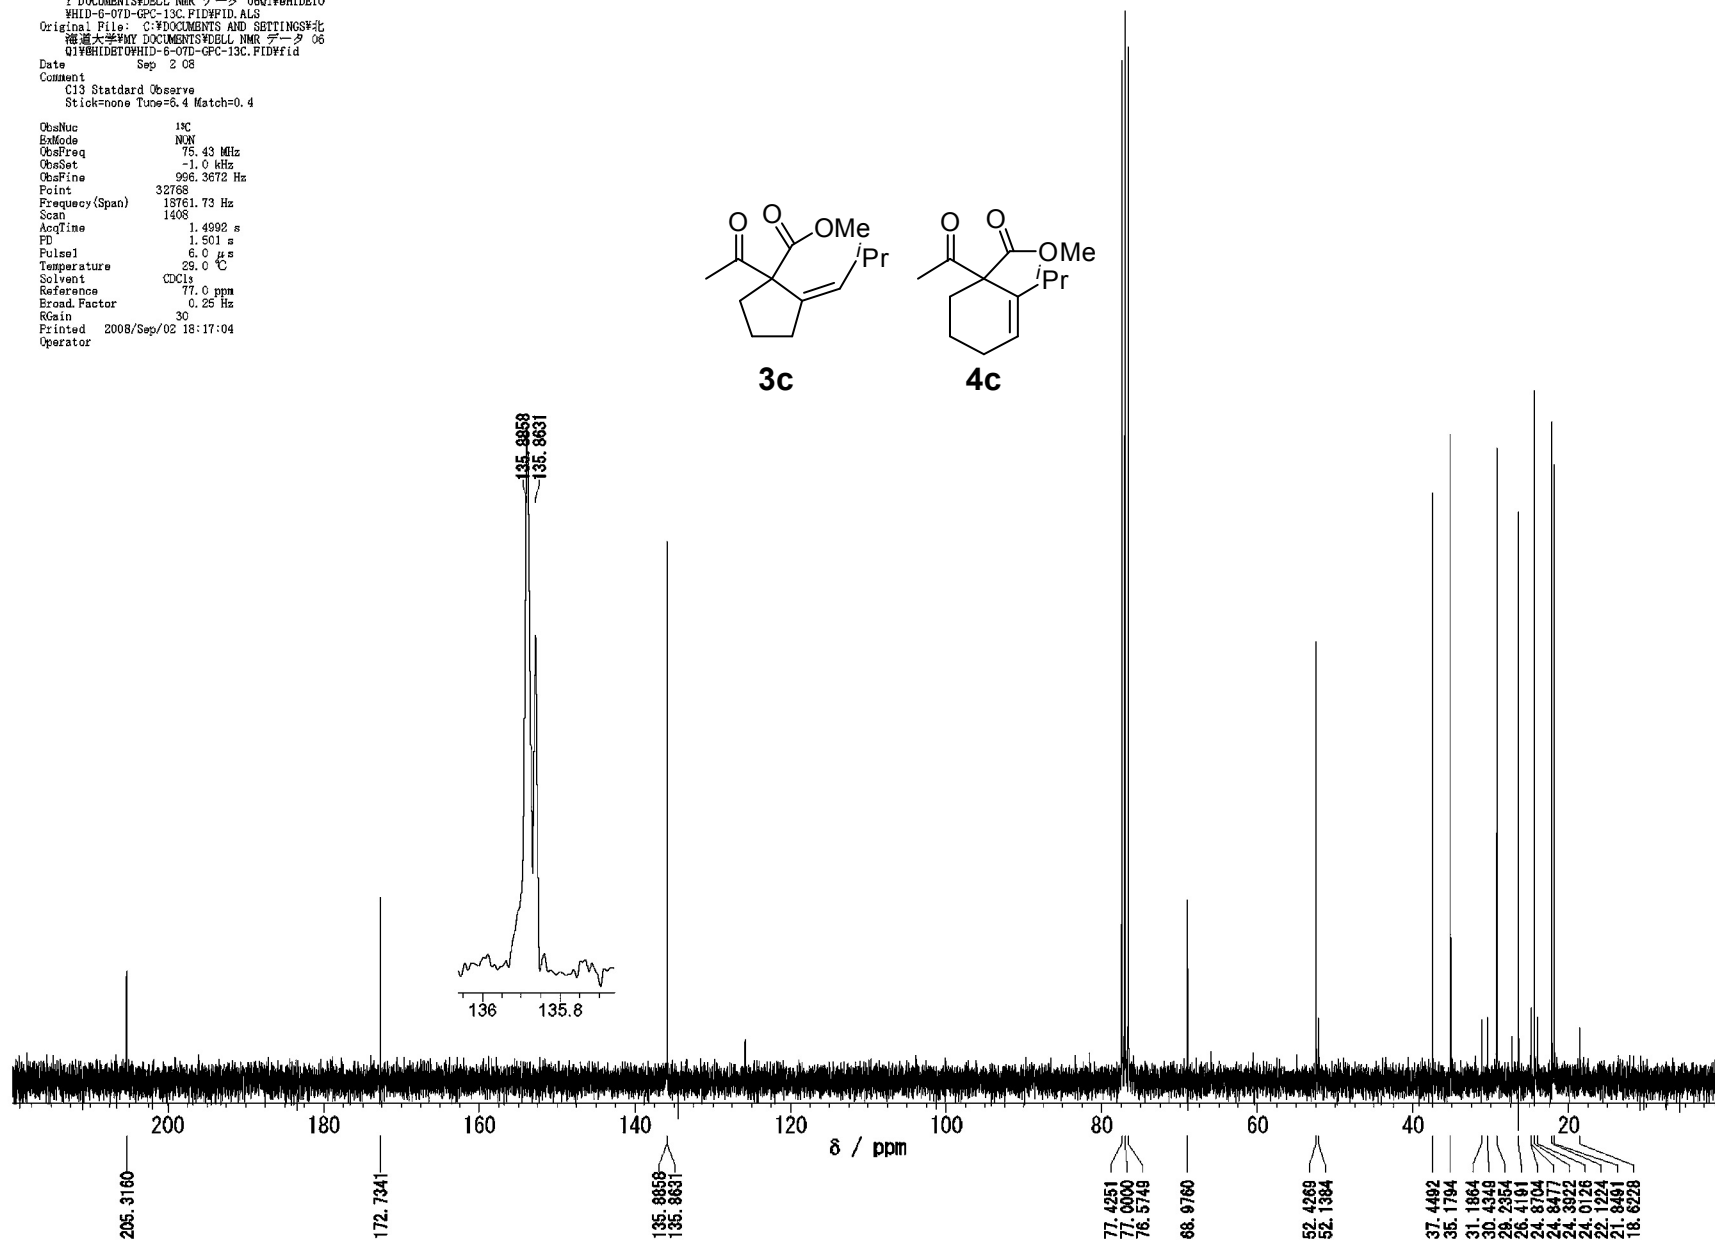

File C:\DOCUMENTS AND SETTINGS\北海道大学\NMR データ 06014\810610\HID-5-86D-GPC-1H.FID\FID.AL5

Original File:

Date Jul 29 08

Comment STANDARD 1H OBSERVE

ObsNuc 1H  
ExMode NON  
ObsFreq 299.96 MHz  
ObsSet -1.0 kHz  
ObsFine 995.0047 Hz  
Point 16384  
Frequency (Span) 4500.45 Hz  
Scan 32  
AcqTime 3.4983 s  
FD 1.502 s  
Pulse 6.0  $\mu$ s  
Temperature 29.0  $^{\circ}$ C  
Solvent CDCl<sub>3</sub>  
Reference 0.0 ppm  
Broad.Factor 0.1373 Hz  
RGain 12  
Printed 2008/Sep/02 18:18:16  
Operator

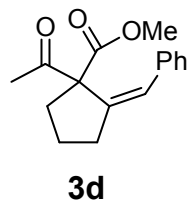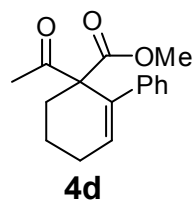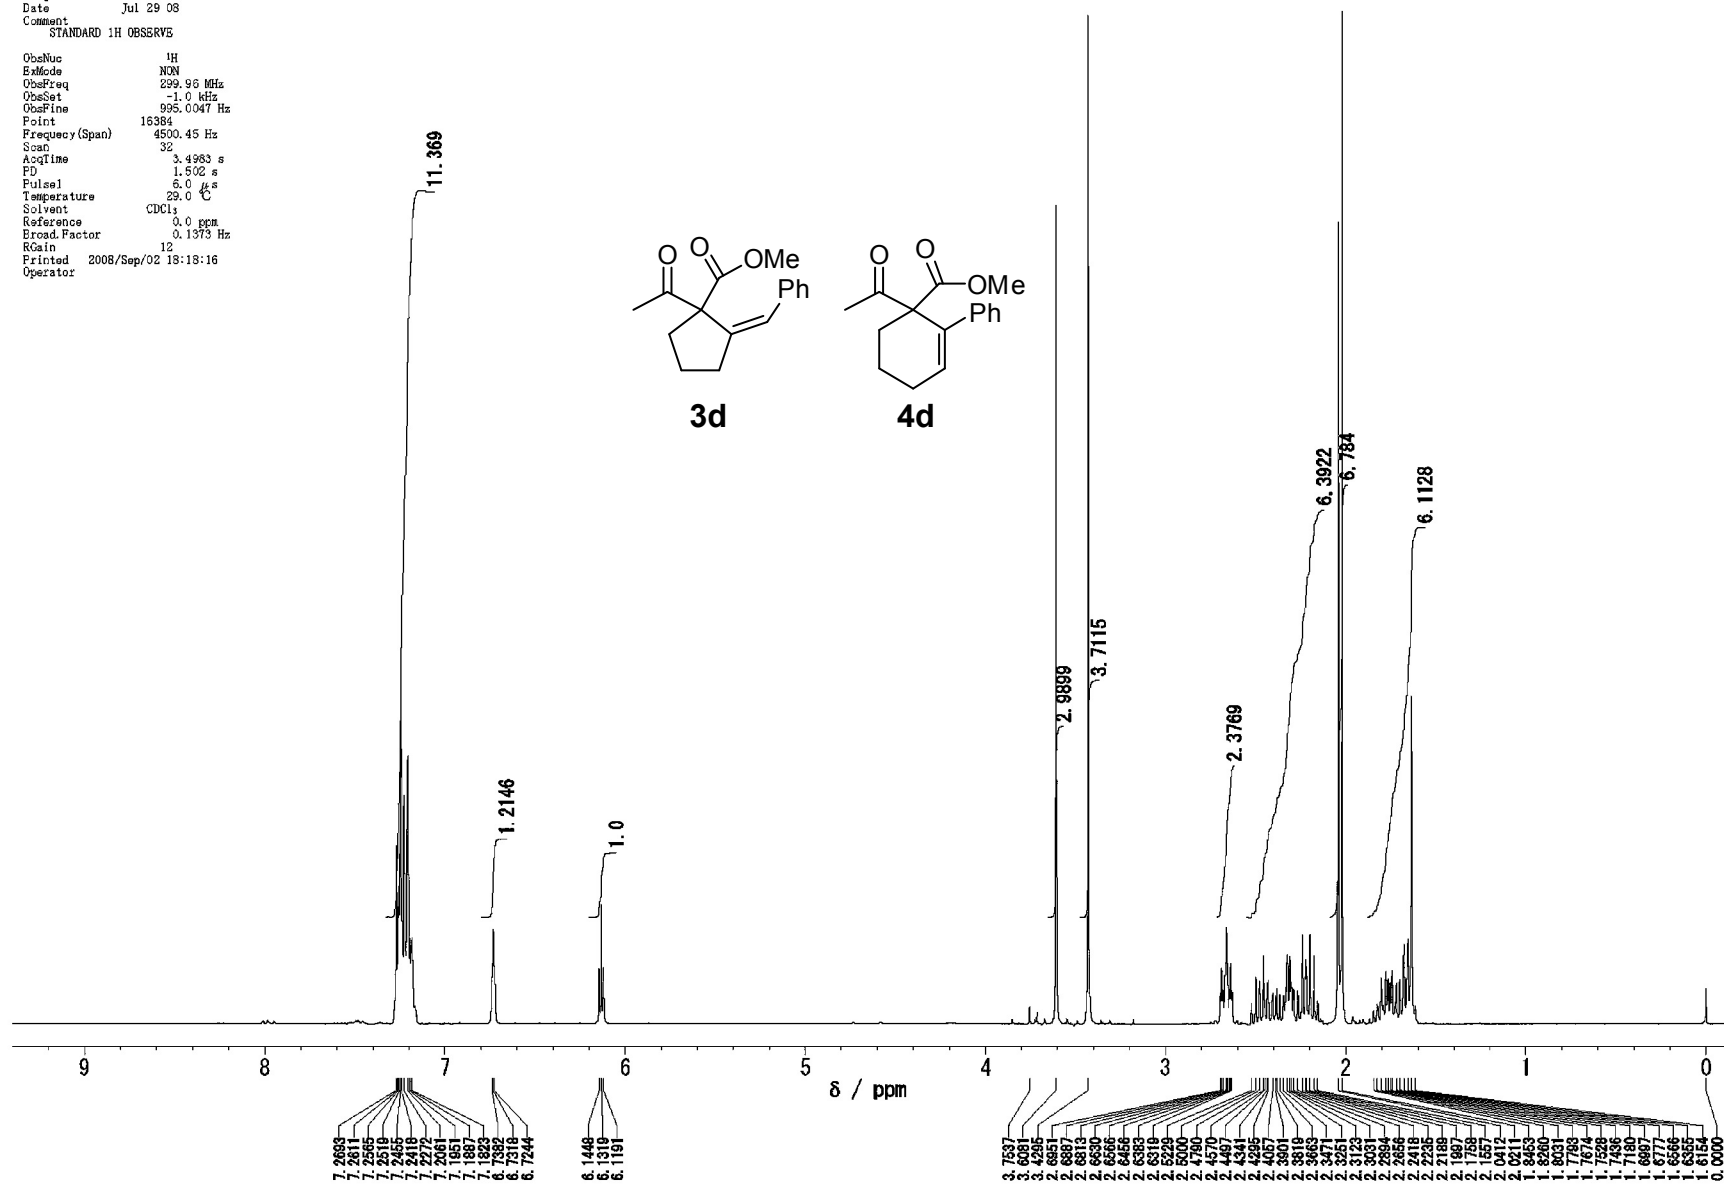



File: C:\DOCUMENTS AND SETTINGS\北海道大学\MY DOCUMENTS\DELL NMR データ 06Q1\WHD5T0\HID-5-86B-GPC-13C.FID\FID.ALS

Original File:

Date: Jul 29 08

Comment:

C13 Standard Observe  
Stick:none Tune=6.4 Match=0.4

ObsNuc: <sup>13</sup>C  
ExMode: NON  
ObsFreq: 75.43 MHz  
ObsSet: -1.0 kHz  
ObsPine: 996.3672 Hz  
Point: 32768  
Frequency (Span): 18761.73 Hz  
Scan: 12800  
AcqTime: 1.4992 s  
PD: 1.501 s  
Pulse1: 6.0 μs  
Temperature: 29.0 °C  
Solvent: CDCl<sub>3</sub>  
Reference: 77.0 ppm  
Broad.Factor: 0.2853 Hz  
RGain: 30  
Printed: 2008/Aug/18 10:44:19  
Operator:

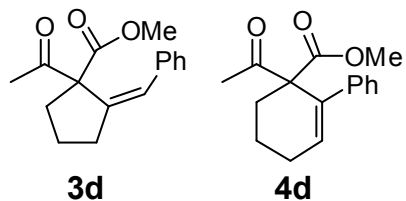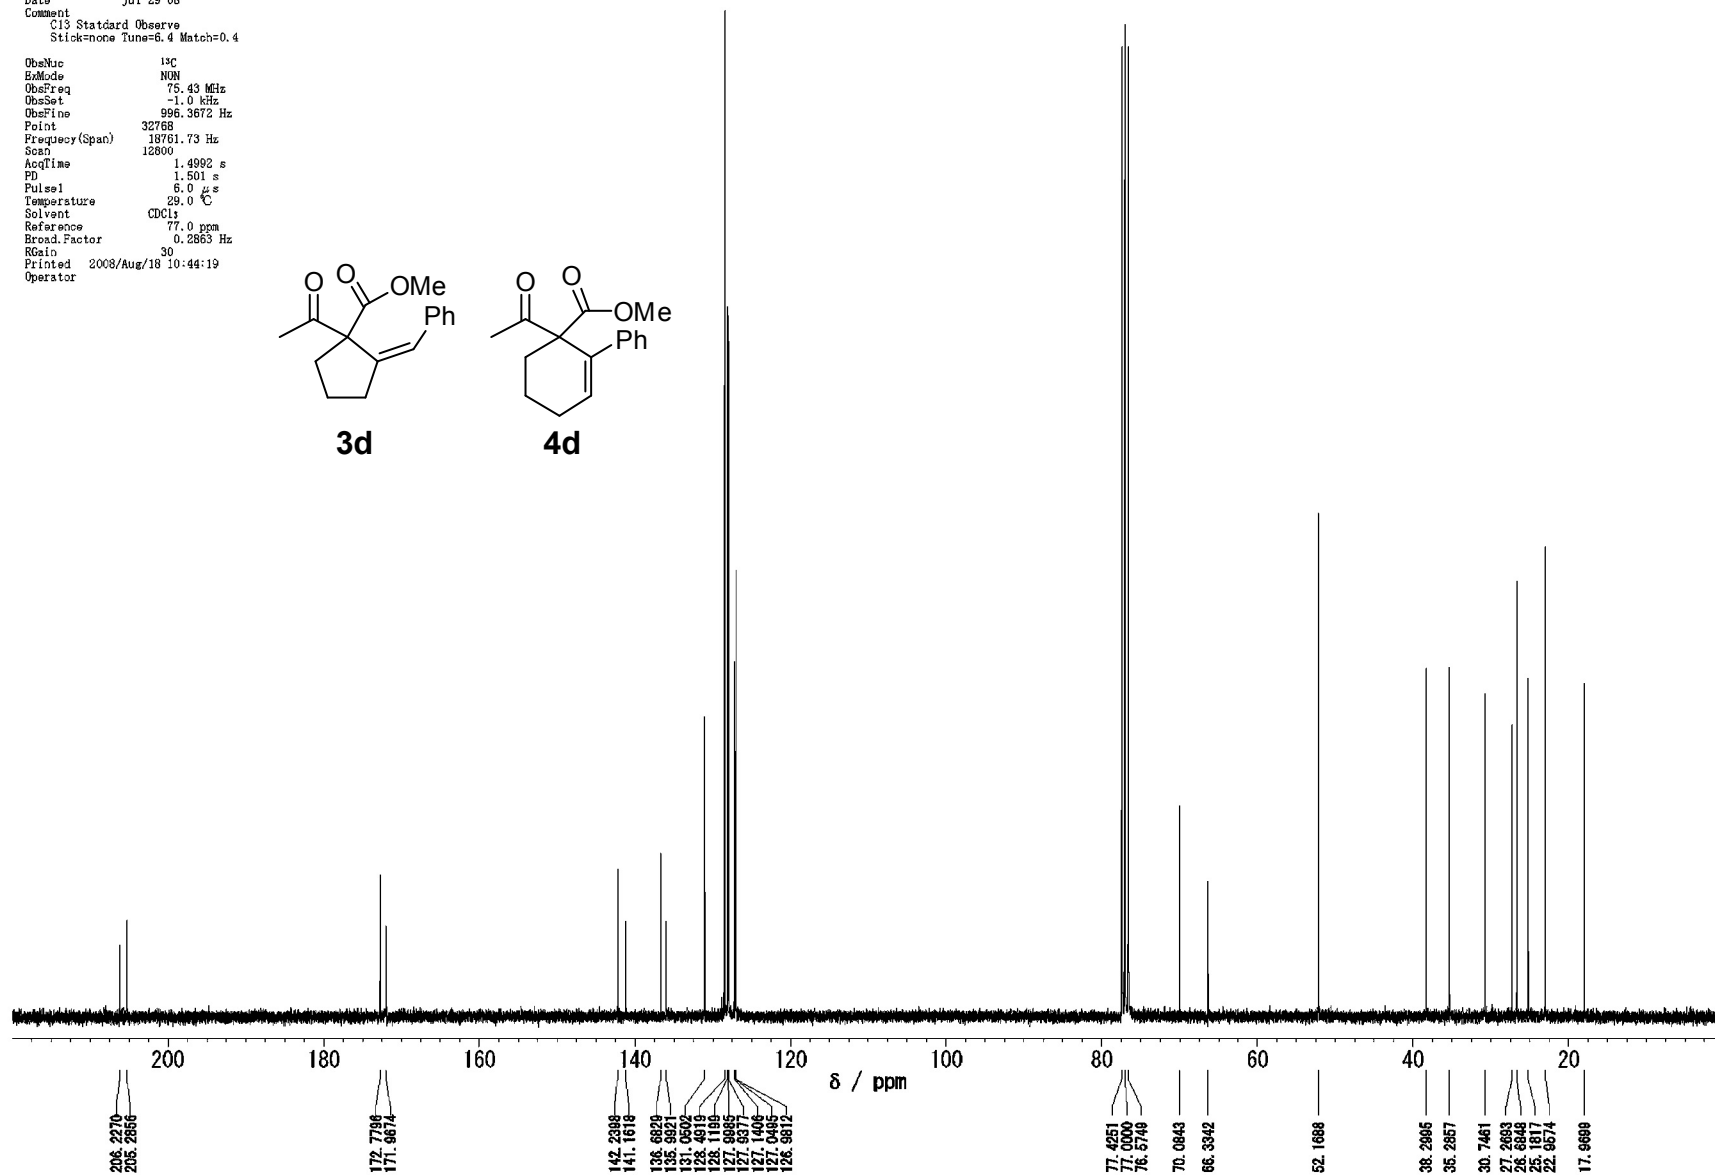

File C:\DOCUMENTS AND SETTINGS\北海  
道大学\MY DOCUMENTS\DELL MR デー  
タ 0601\06010101\0601-5-32E-FR1-1H.  
FID\FID.ALS  
Original File:  
Date Jul 17 08  
Comment  
STANDARD 1H OBSERVE

ObseNuc 1H  
ExMode NON  
ObsFreq 299.96 MHz  
ObsSet -1.0 kHz  
ObsPine 995.0047 Hz  
Point 16384  
Frequency (Span) 4500.45 Hz  
Scan 32  
AcqTime 3.4963 s  
PD 1.502 s  
Pulse1 6.0  $\mu$ s  
Temperature 29.0  $^{\circ}$ C  
Solvent CDCl<sub>3</sub>  
Reference 0.0 ppm  
Broad Factor 0.1373 Hz  
RGain 6  
Printed 2008/Aug/18 11:26:46  
Operator

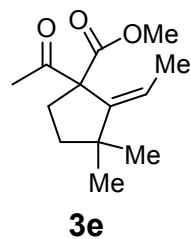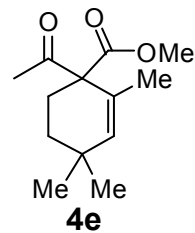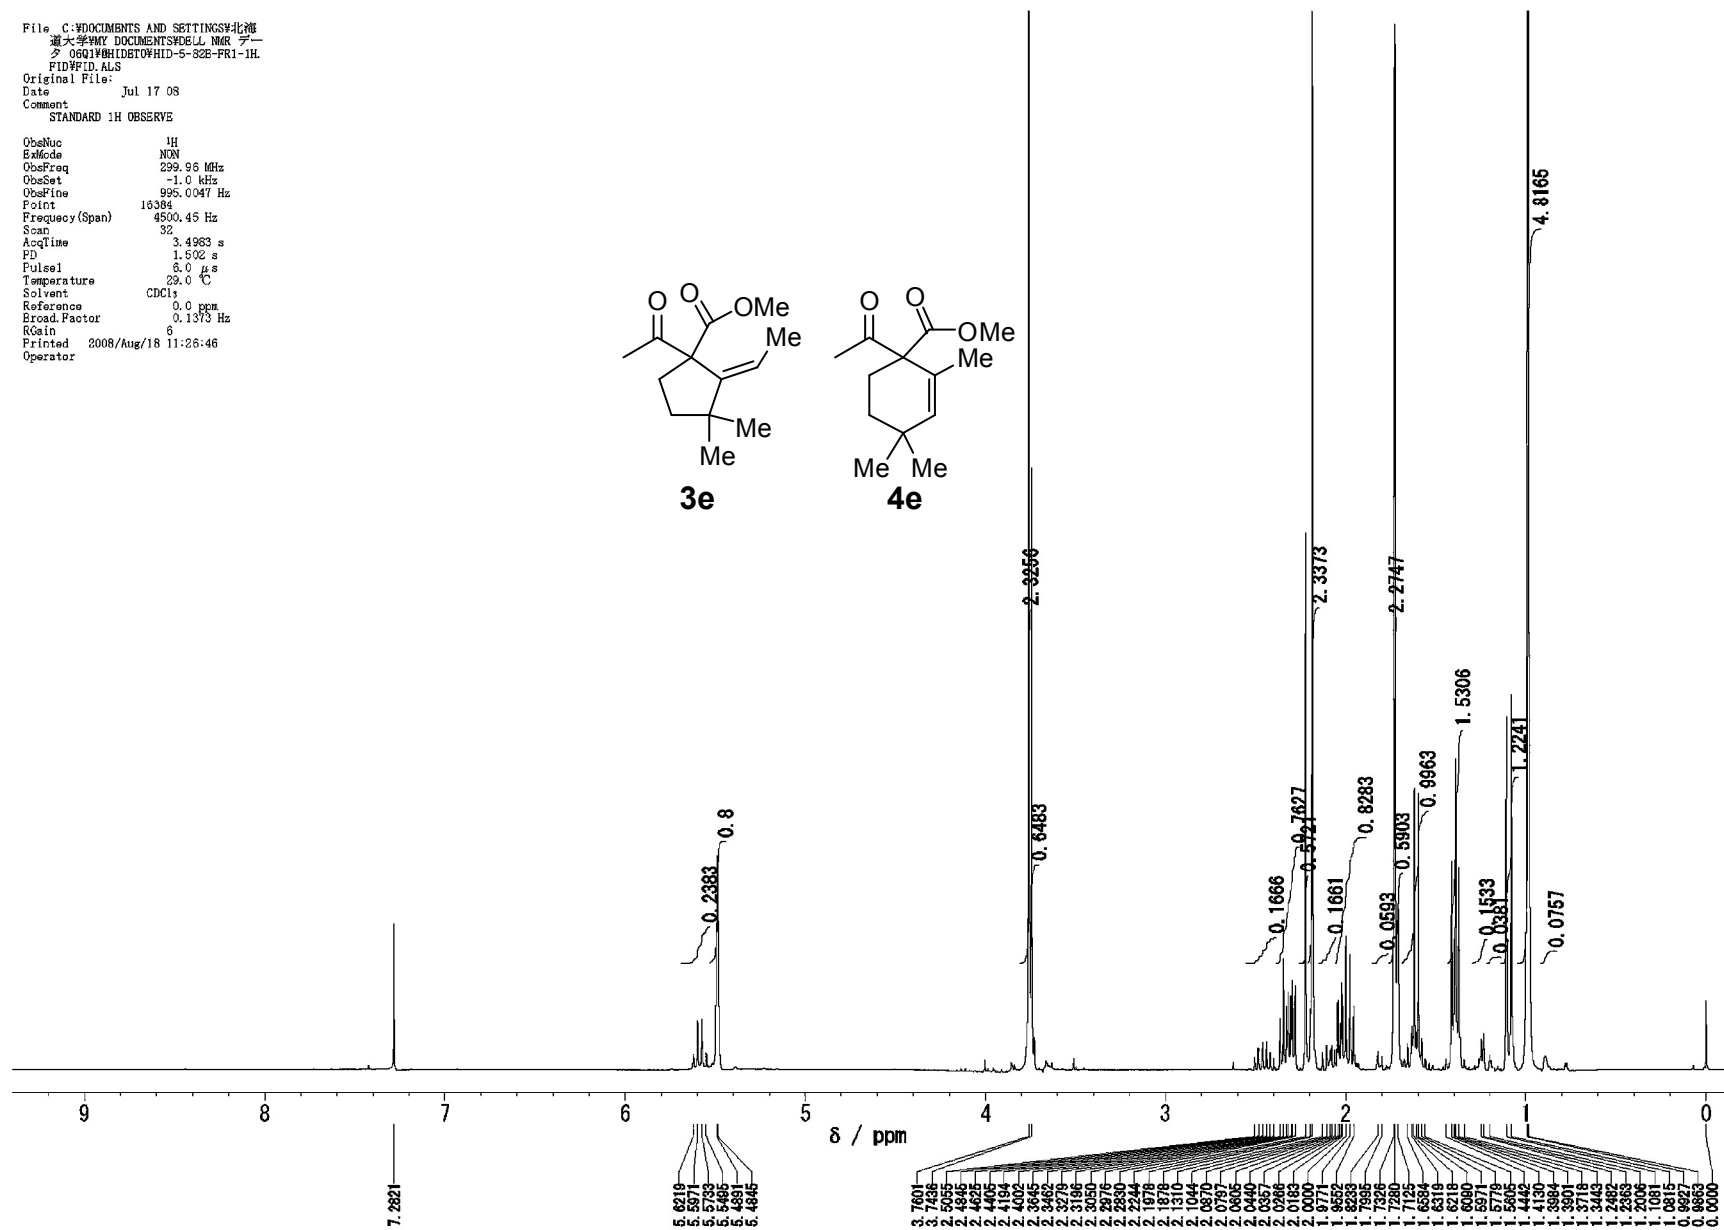

File C:\DOCUMENTS AND SETTINGS\北海  
道大学\MY DOCUMENTS\FIDELL NMR デー  
タ 06Q146HIDETOWHID-5-82C-FR1-13C  
.FID\FID.ALS

Original File:  
Date Jul 17 08

Comment  
C13 Statdard Observe  
Stick:none Tune=6.4 Match=0.4

ObsNuc <sup>13</sup>C  
ExMode NON  
ObsFreq 75.43 MHz  
ObsSet -1.0 kHz  
ObsFine 996.3672 Hz  
Point 32768  
Frequency (Span) 18761.73 Hz  
Scan 12864  
AcqTime 1.4992 s  
PD 1.501 s  
Pulse 6.0  $\mu$ s  
Temperature 23.0  $^{\circ}$ C  
Solvent CDCl<sub>3</sub>  
Reference 77.0 ppm  
Broad.Factor 0.2863 Hz  
RGain 30  
Printed 2008/Aug/18 11:29:36  
Operator

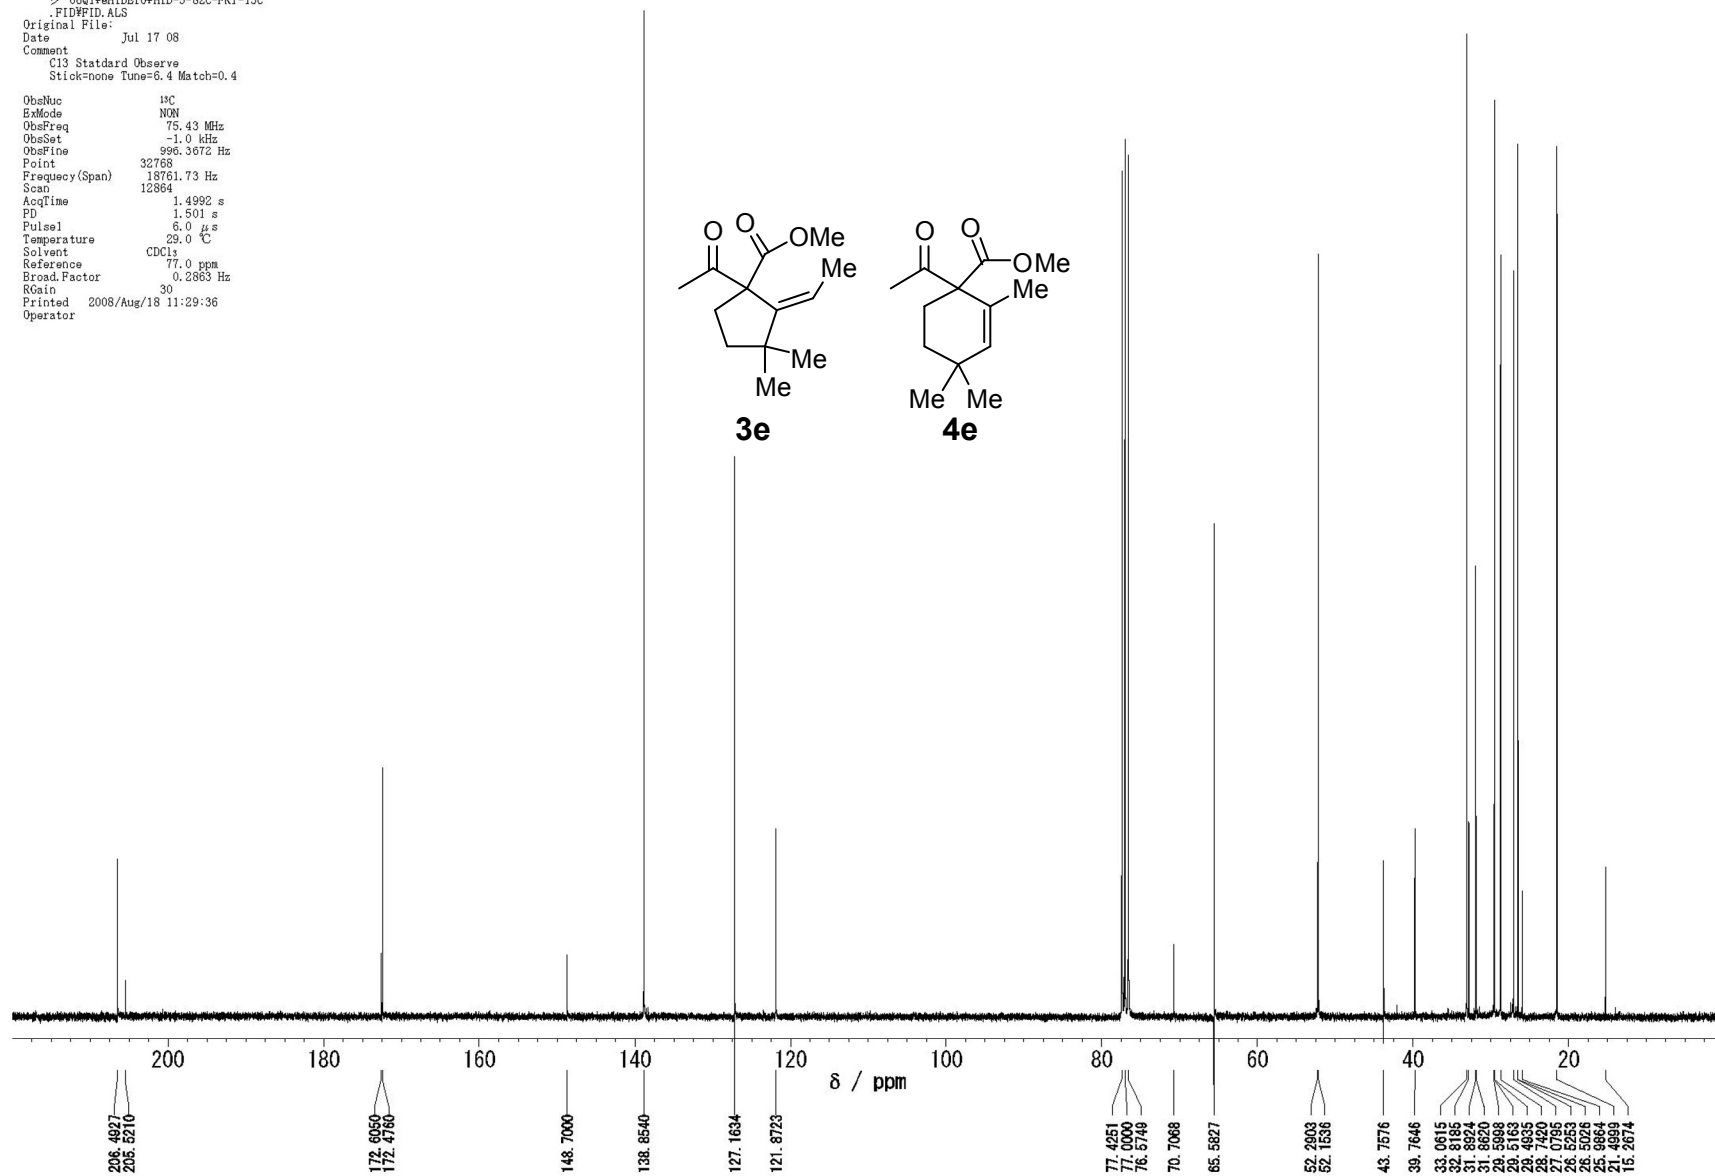

File C:\DOCUMENTS AND SETTINGS\北海道大学\NMR データ 06Q14\8HIDETOWHID-3\HID-3-6SD-PR1FTLC-1H  
 .FID\FID.AL6  
 Original File:  
 Date Sep 18 07  
 Comment  
 STANDARD 1H OBSERVE

ObsNuc 1H  
 ExMode NUN  
 ObsFreq 299.96 MHz  
 ObsSet -1.0 kHz  
 ObsPino 995.0047 Hz  
 Point 16384  
 Frequency (Span) 4500.45 Hz  
 Scan 64  
 AcqTime 3.4983 s  
 PD 1.502 s  
 Pulse1 6.0  $\mu$ s  
 Temperature 29.0  $^{\circ}$ C  
 Solvent CDCl3  
 Reference 0.0 ppm  
 Broad.Factor 0.1373 Hz  
 RGain 12  
 Printed 2008/Aug/18 11:41:44

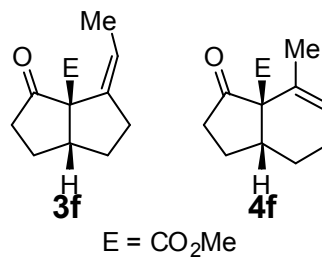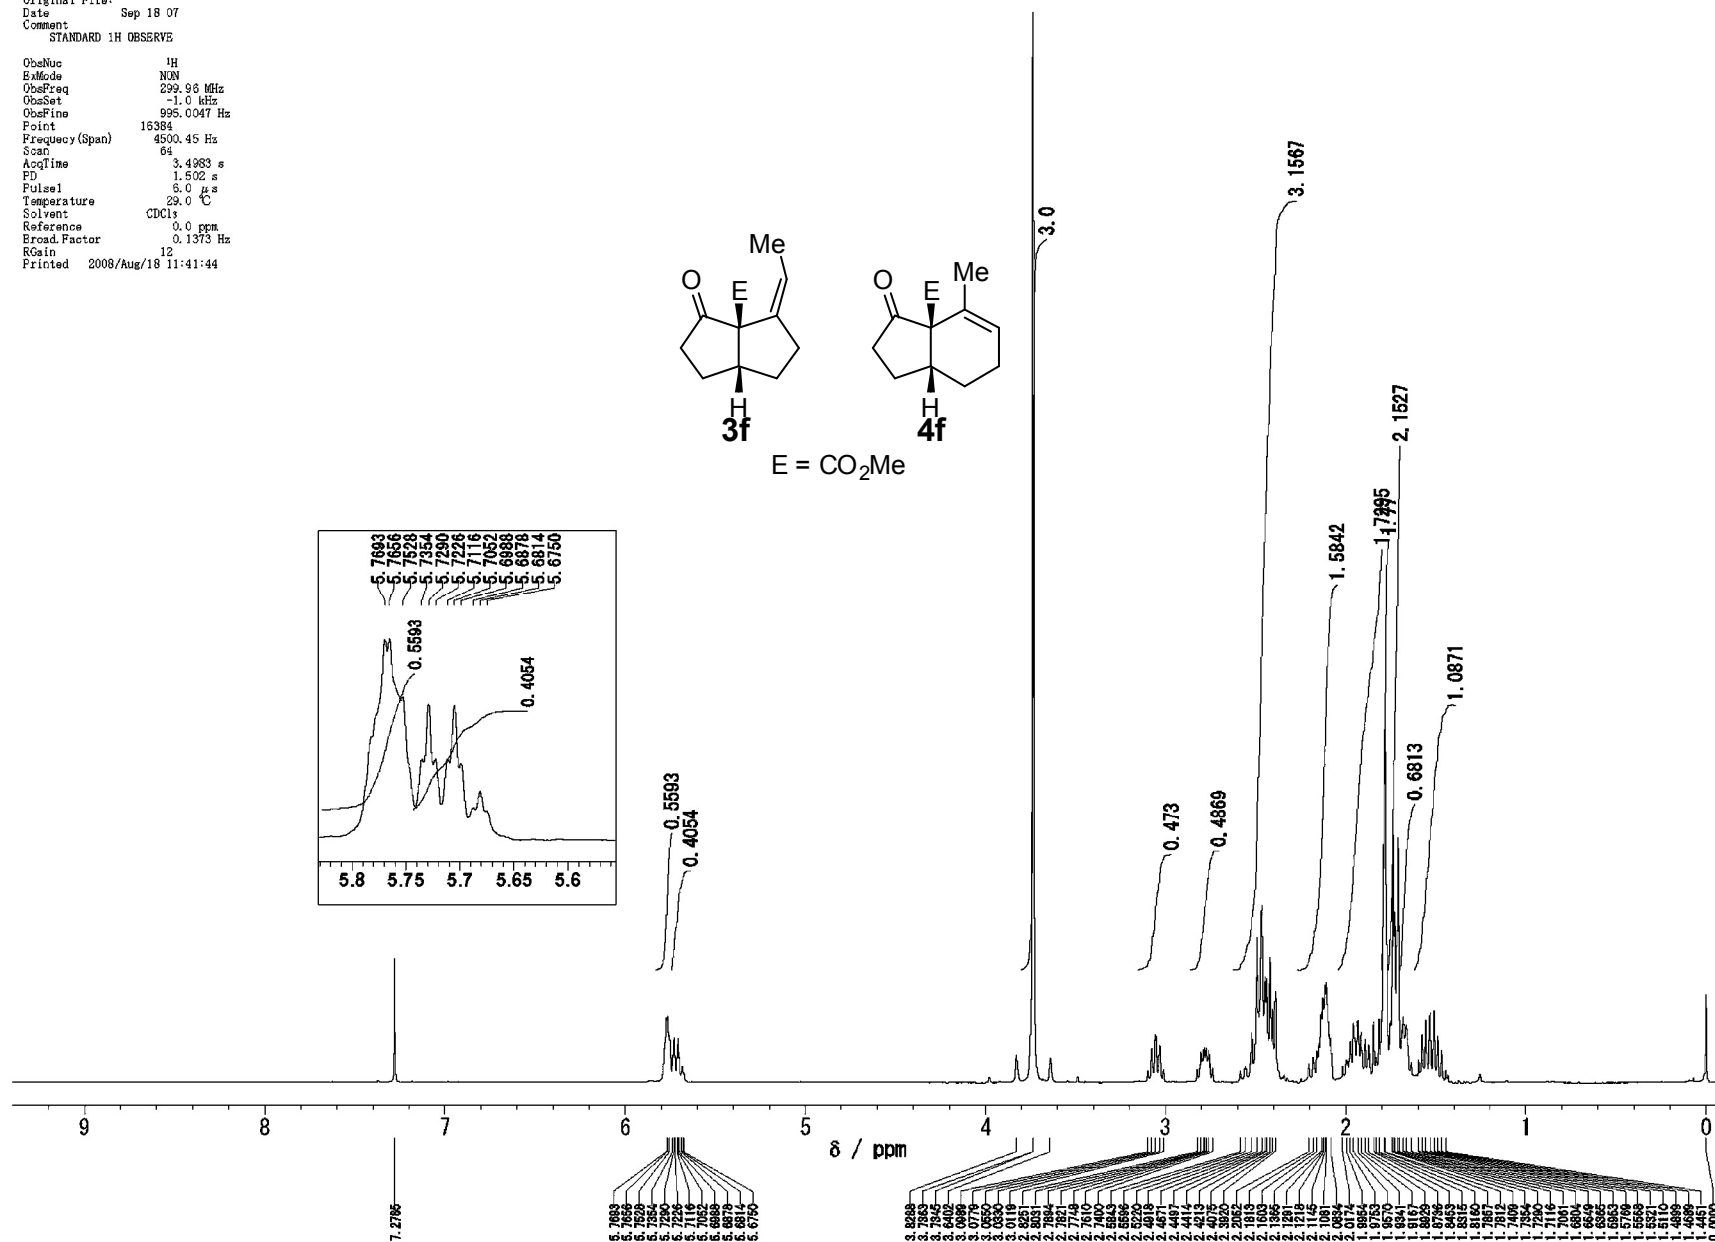

File C:\DOCUMENTS AND SETTINGS\北海道大学\NMR データ 06Q14\8HIDBTOWHID-3\HID-3-63E-PR1FTLC-13  
 C.FID\FID.ALS  
 Original File:  
 Date Sep 18 07  
 Comment  
 C13 Standard Observe  
 Stick:none Tune=6.4 Match=0.4

ObsNuc <sup>13</sup>C  
 ExMode NON  
 ObsFreq 75.43 MHz  
 ObsSol -1.0 MHz  
 ObsPine 996.3672 Hz  
 Point 32768  
 Frequency (Span) 20000.0 Hz  
 Scan 14912  
 AcqTime 1.4992 s  
 PD 1.501 s  
 Pulse1 6.0  $\mu$ s  
 Temperature 29.0  $^{\circ}$ C  
 Solvent CDCl<sub>3</sub>  
 Reference 77.0 ppm  
 Broad.Factor 0.3052 Hz  
 RGain 29

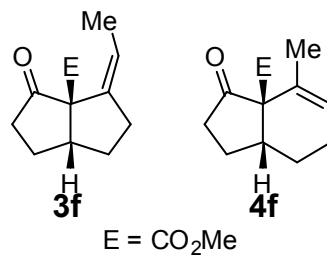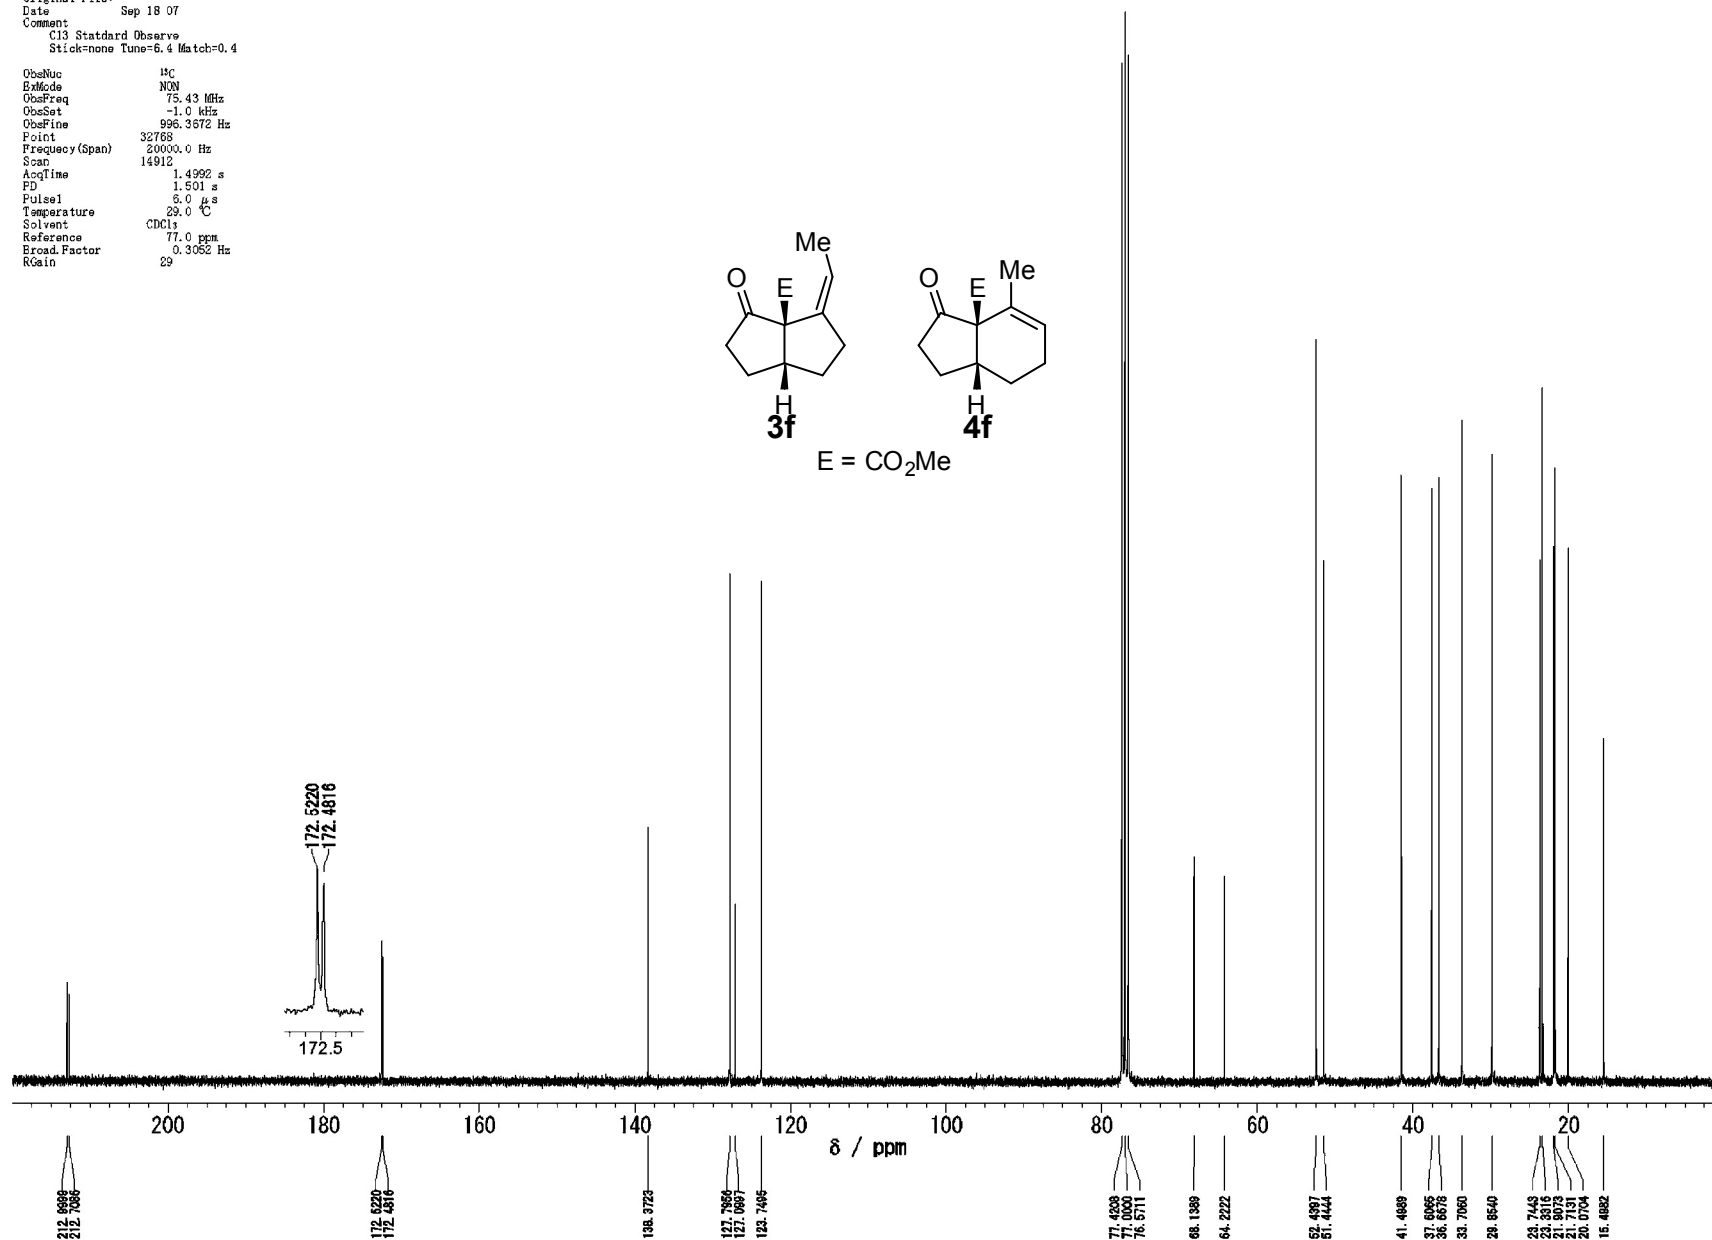

File C:\DOCUMENTS AND SETTINGS\北海道大学\NMR\DOCUMENTS\DELL NMR データ 06Q14\HIDETOWHID-4-116B-PR1-1H.FID\WFI.D.ALS  
 Original File:  
 Date Mar 21 08  
 Comment  
 STANDARD 1H OBSERVE

ObsNuc 1H  
 ExMode NON  
 ObsFreq 299.96 MHz  
 ObsSet -1.0 kHz  
 ObsFine 995.0047 Hz  
 Point 16384  
 Frequency (Span) 4500.45 Hz  
 Scan 32  
 AcqTime 3.4983 s  
 PD 1.502 s  
 Pulse 6.0  $\mu$ s  
 Temperature 29.0  $^{\circ}$ C  
 Solvent CDCl<sub>3</sub>  
 Reference 0.0 ppm  
 Broad.Factor 0.1973 Hz  
 SGain 6  
 Printed 2008/Aug/18 20:36:07  
 Operator

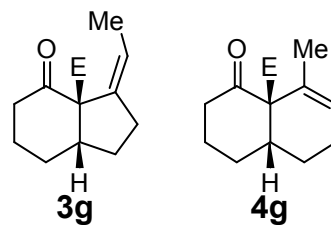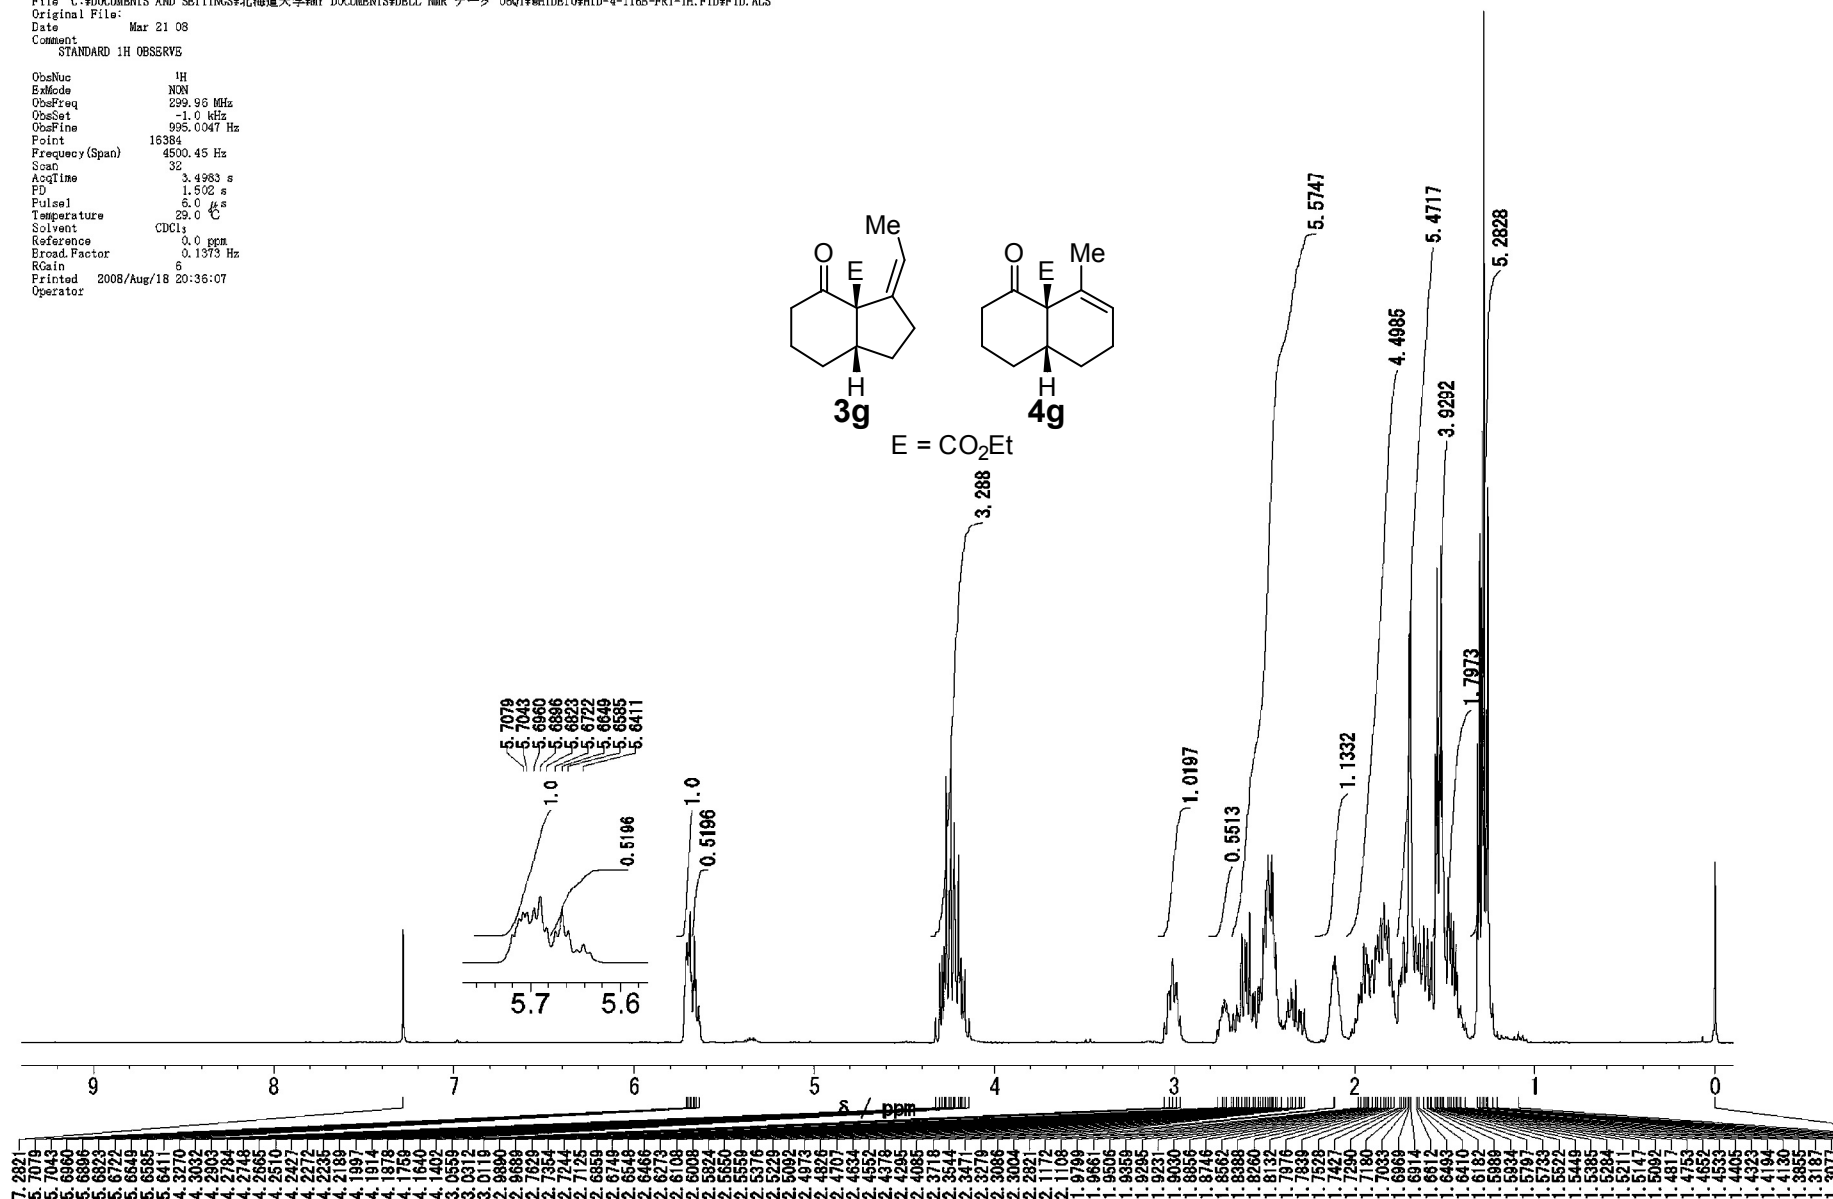

File C:\DOCUMENTS AND SETTINGS\北海道大学\NMR データ 06Q14\HIDETOWHID-4-116C-F1-13C.FID\FID.ALS

Original File:

Date Mar 21 08

Comment

C13 Standard Observe  
Stick:none Tune=6.4 Match=0.4

ObsNuc <sup>13</sup>C  
ExMode NON  
ObsFreq 75.43 MHz  
ObsSet -1.0 kHz  
ObsPine 996.3672 Hz  
Point 32768  
Frequency (Span) 18761.73 Hz  
Scan 1024  
AcqTime 1.4992 s  
PD 1.501 s  
Pulse1 6.0 μs  
Temperature 29.0 °C  
Solvent CDCl<sub>3</sub>  
Reference 77.0 ppm  
Broad.Factor 0.2363 Hz  
RGain 30  
Printed 2008/Aug/18 20:40:04  
Operator

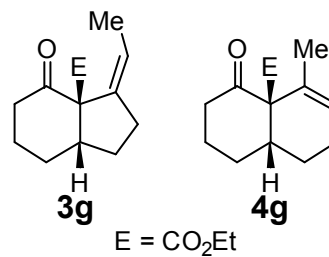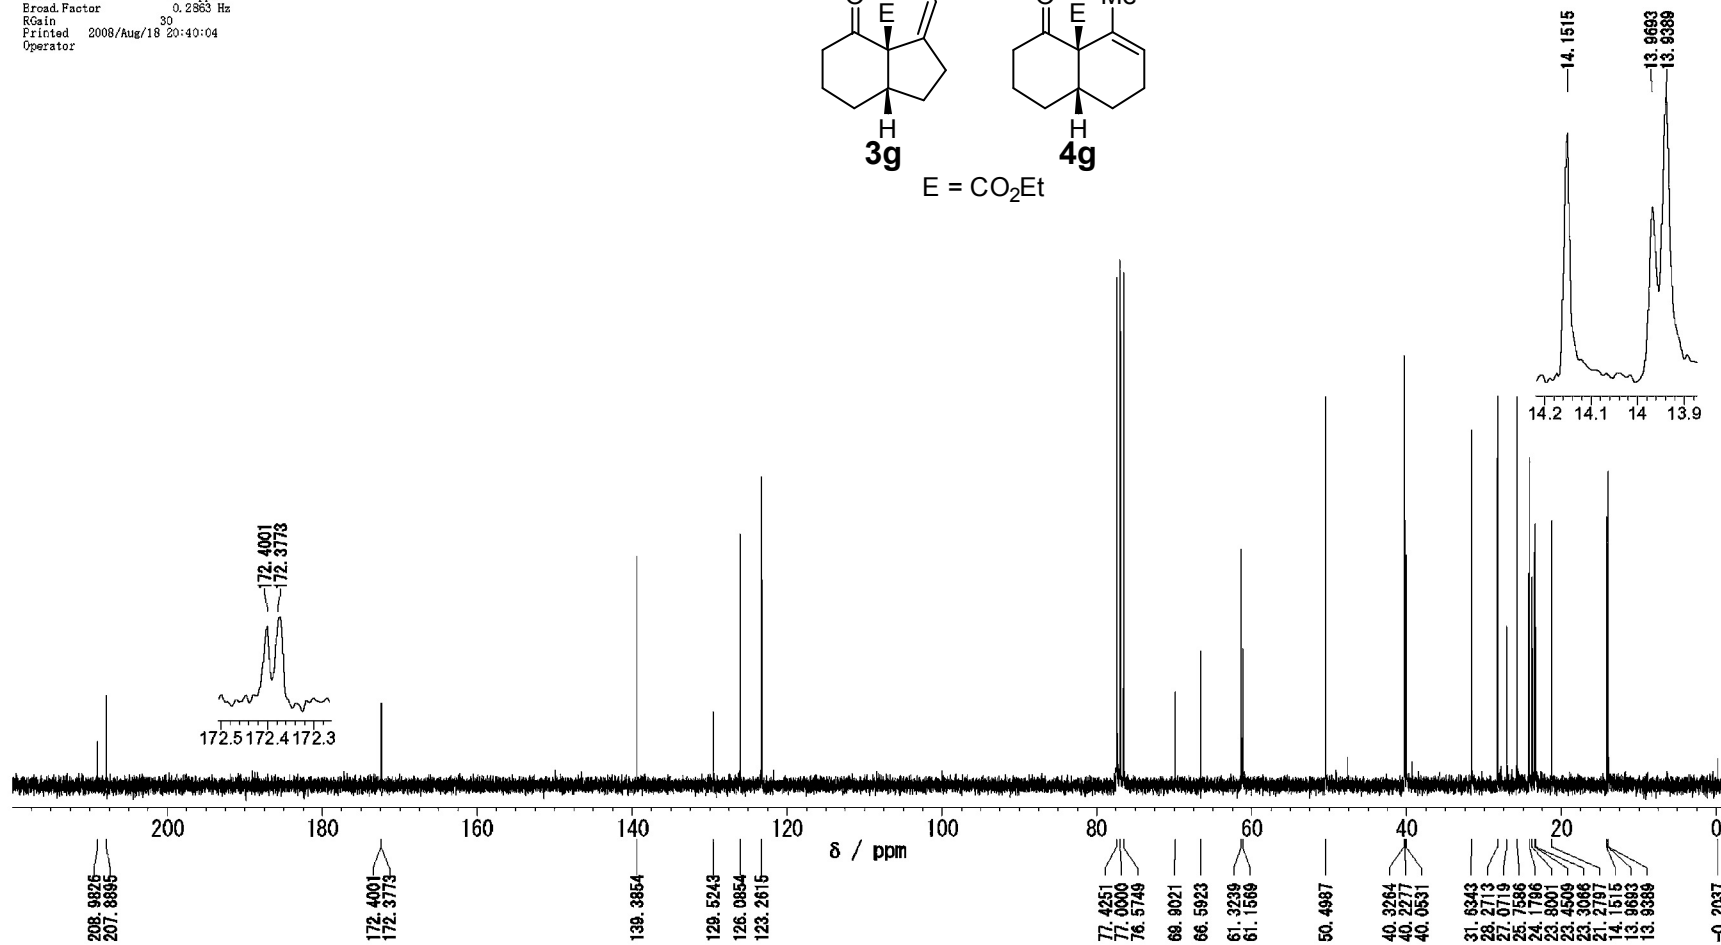

Original File:

Date Mar 21 08

Comment STANDARD 1H OBSERVE

ObsNuc 1H  
ExMode NON  
ObsFreq 299.96 MHz  
ObsSet -1.0 kHz  
ObsFine 995.0047 Hz  
Point 16384  
Frequency (Span) 4500.45 Hz  
Scan 32  
AcqTime 3.4983 s  
FD 1.502 s  
Pulse 6.0  $\mu$ s  
Temperature 29.0  $^{\circ}$ C  
Solvent CDCl<sub>3</sub>  
Reference 0.0 ppm  
Broad.Factor 0.1373 Hz  
Gain 7  
Printed 2008/Aug/26 21:33:29  
Operator

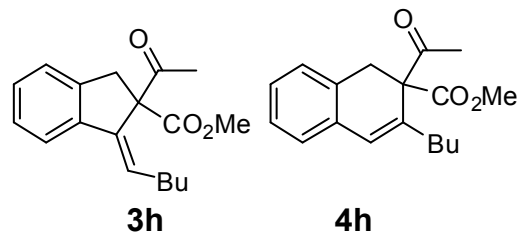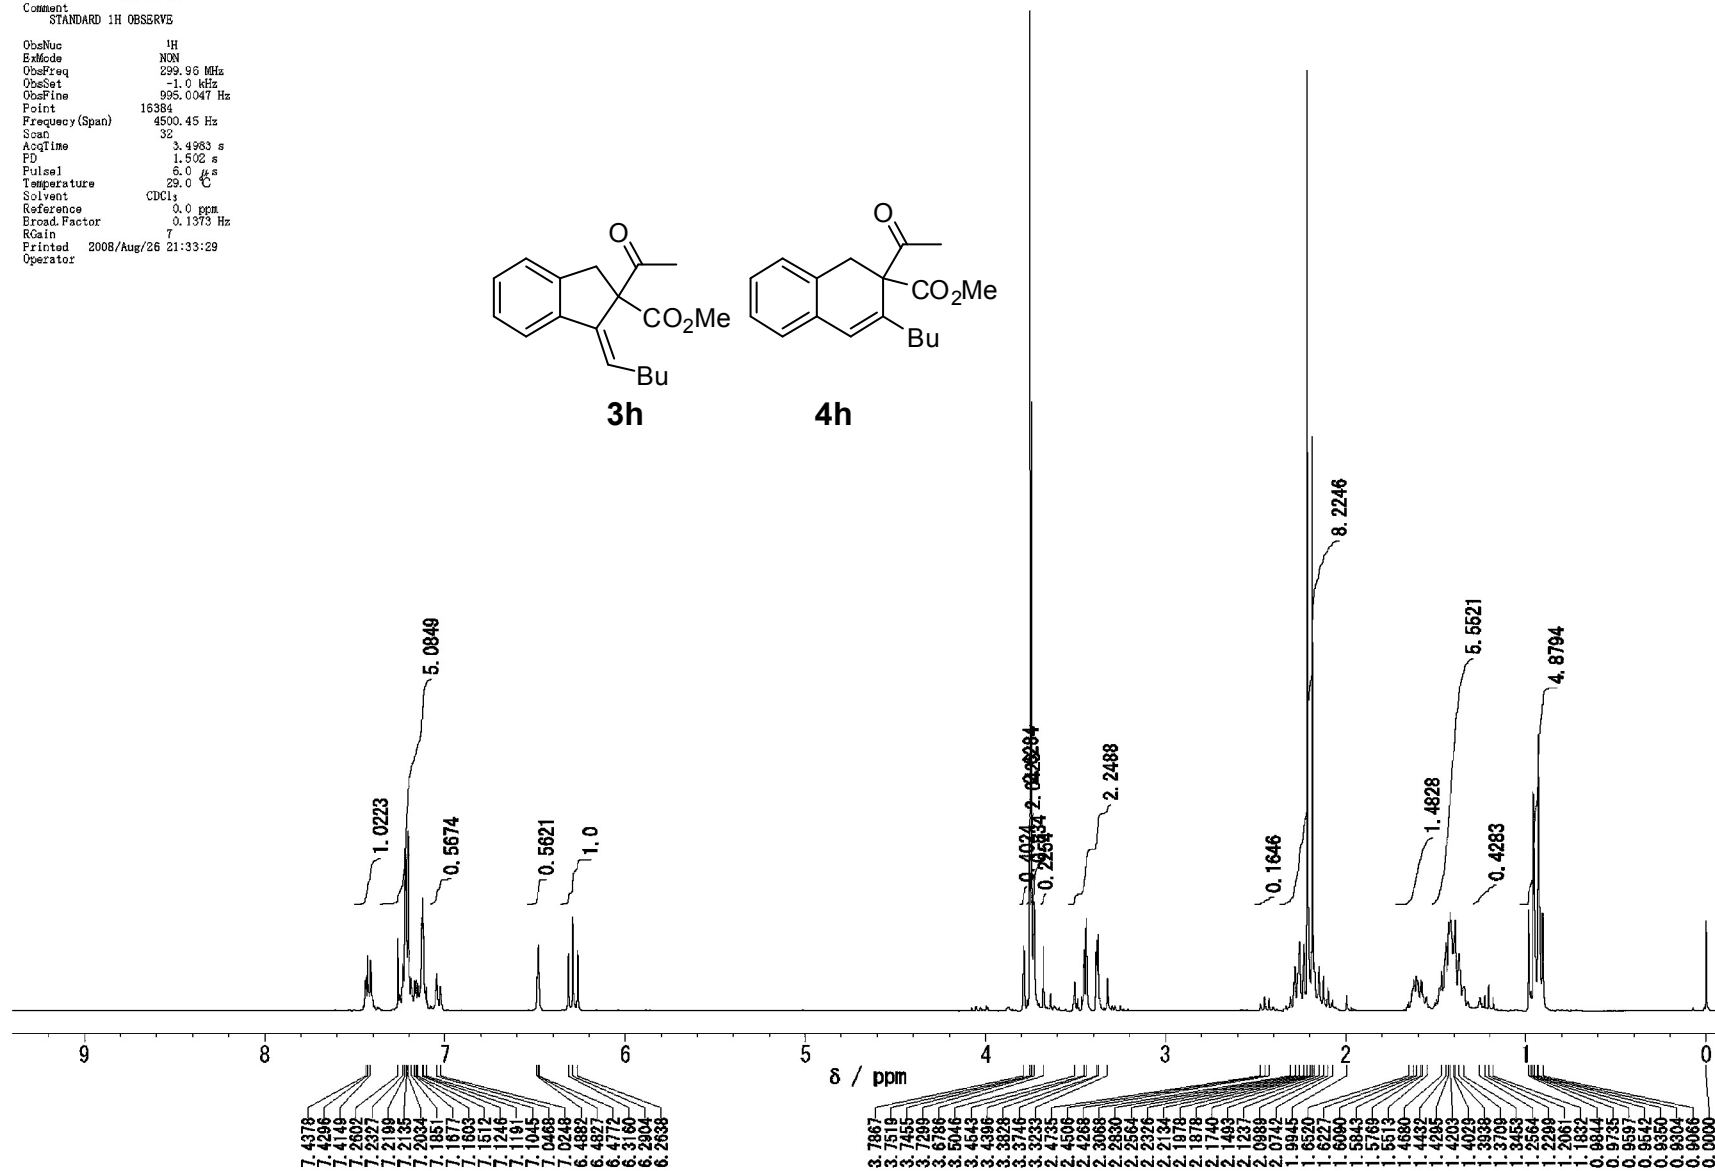



File C:\DOCUMENTS AND SETTINGS\北海道大学\NMR データ 06Q1\HIDBTO\HID-4-114D-PR1-13C.FID\FID.ALS

Original File:

Date Mar 21 08

Comment

C13 Standard Observe  
Stick:none Tune=6.4 Match=0.4

ObsNuc <sup>13</sup>C  
ExMode NON  
ObsFreq 75.43 MHz  
ObsSet -1.0 kHz  
ObsPine 995.3572 Hz  
Point 32768  
Frequency (Span) 18751.73 Hz  
Scan 8896  
AcqTime 1.4992 s  
PD 1.501 s  
Pulse1 6.0 μs  
Temperature 29.0 °C  
Solvent CDCl<sub>3</sub>  
Reference 77.0 ppm  
Broad.Factor 0.2363 Hz  
RGain 30  
Printed 2008/Aug/26 21:35:40  
Operator

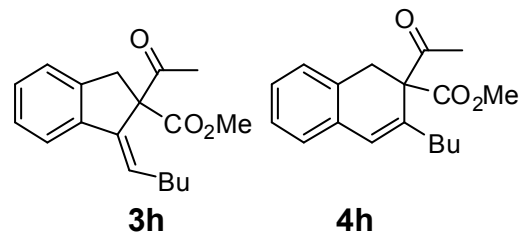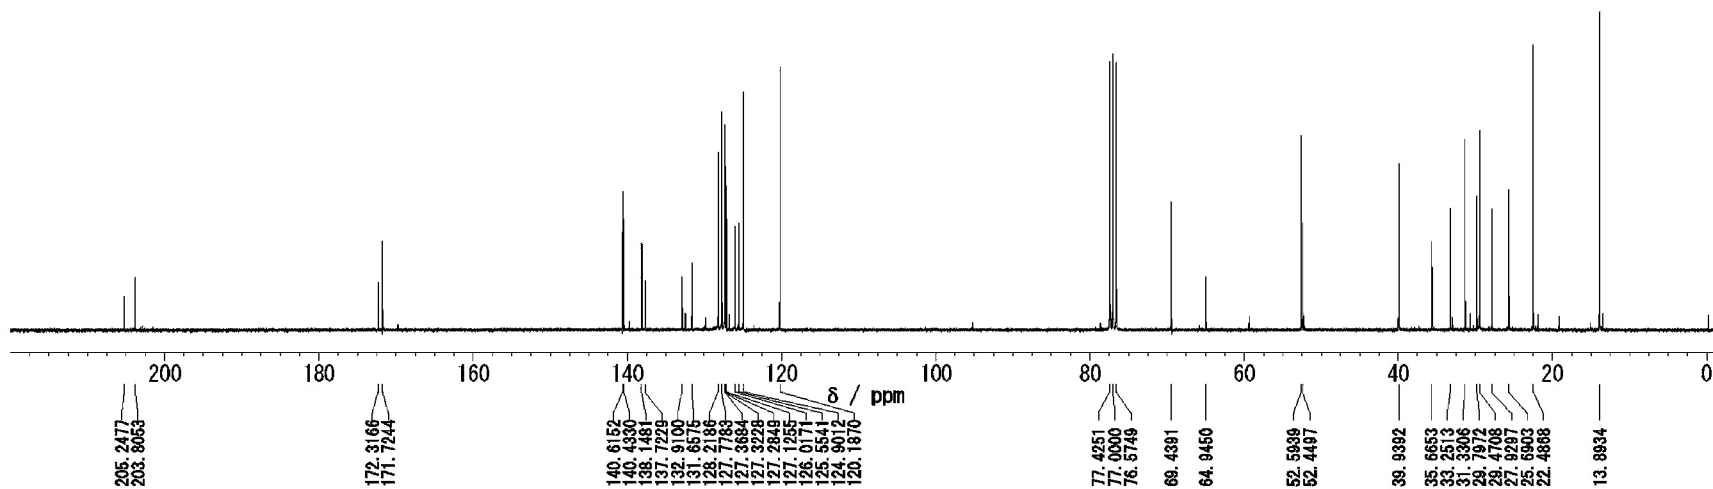

```
ObsNuC      1H
ExpDate      NON
ObsFreq      299.96 MHz
ObsZet       -1.0 kHz
ObsFine      995.0047 Hz
Point        18384
Frequency(Span) 4500.45 Hz
Scan         52
AcqTime      3.4983 s
PD           1.502 s
Pulse1       6.0  $\mu$ s
Temperature  29.0  $^{\circ}$ C
Solvent      CDCl3
Reference    0.0 ppm
ErrCo.Factor 0.1373 Hz
Sgain        19
Printed      2008/Aug/18 21:03:45
Operator
```

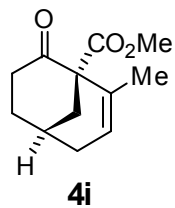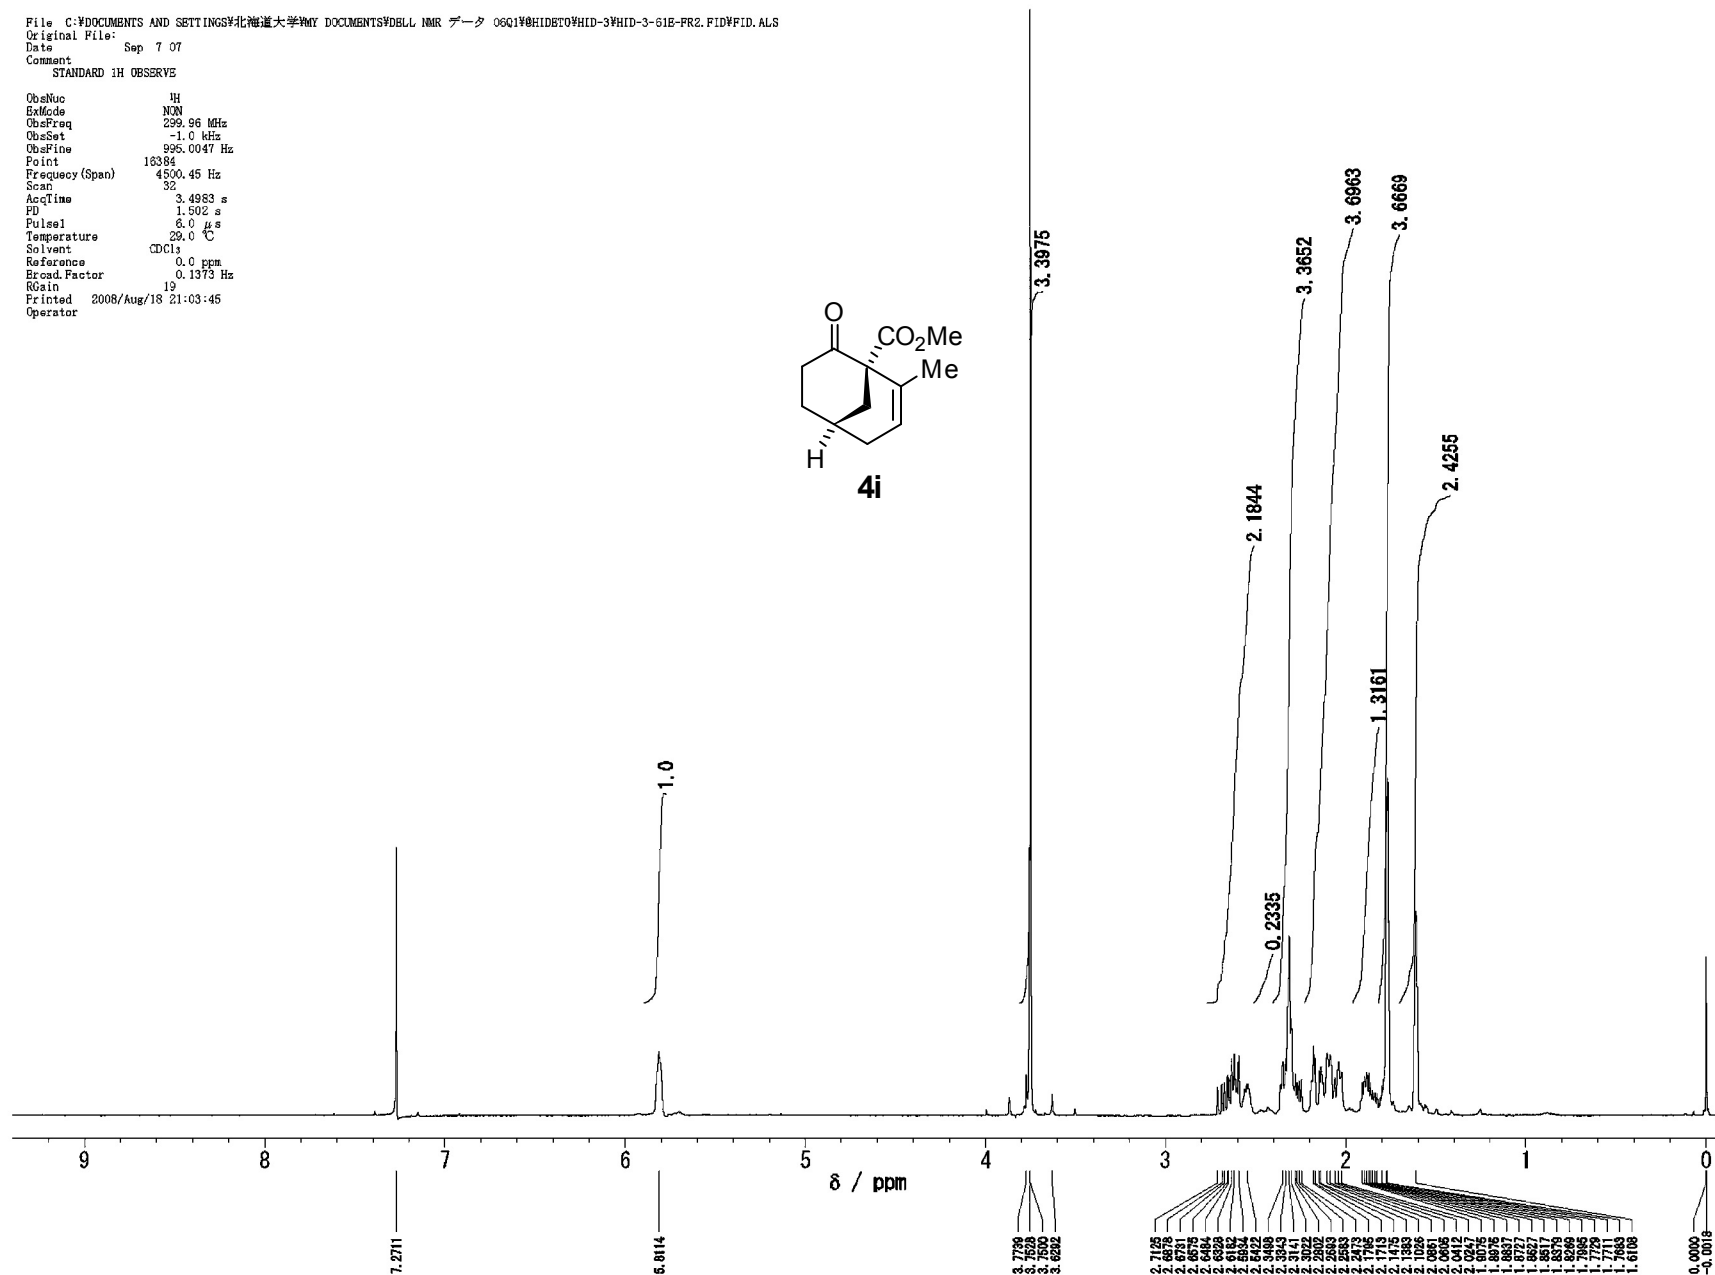

File C:\DOCUMENTS AND SETTINGS\北海道大学\MY DOCUMENTS\DELL NMR データ 06Q1\0HIDBTO\HID-3\HID-3-61F-FR2-13C.FID\FID.ALS

Original File: Sep 7 07

Date Sep 7 07

Comment C13 Standard Observe

Stick=None Tune=6.4 Match=0.4

ObsNuc <sup>13</sup>C  
ExMode NON  
ObsFreq 75.43 MHz  
ObsSet -1.0 kHz  
ObsPine 996.3672 Hz  
Point 32768  
Frequency (Span) 18761.73 Hz  
Scan 2304  
AcqTime 1.4992 s  
PD 1.501 s  
Pulse1 6.0  $\mu$ s  
Temperature 29.0  $^{\circ}$ C  
Solvent CDCl<sub>3</sub>  
Reference 77.0 ppm  
Broad Factor 0.2883 Hz  
RGain 30  
Printed 2008/Aug/18 21:06:01  
Operator

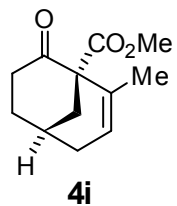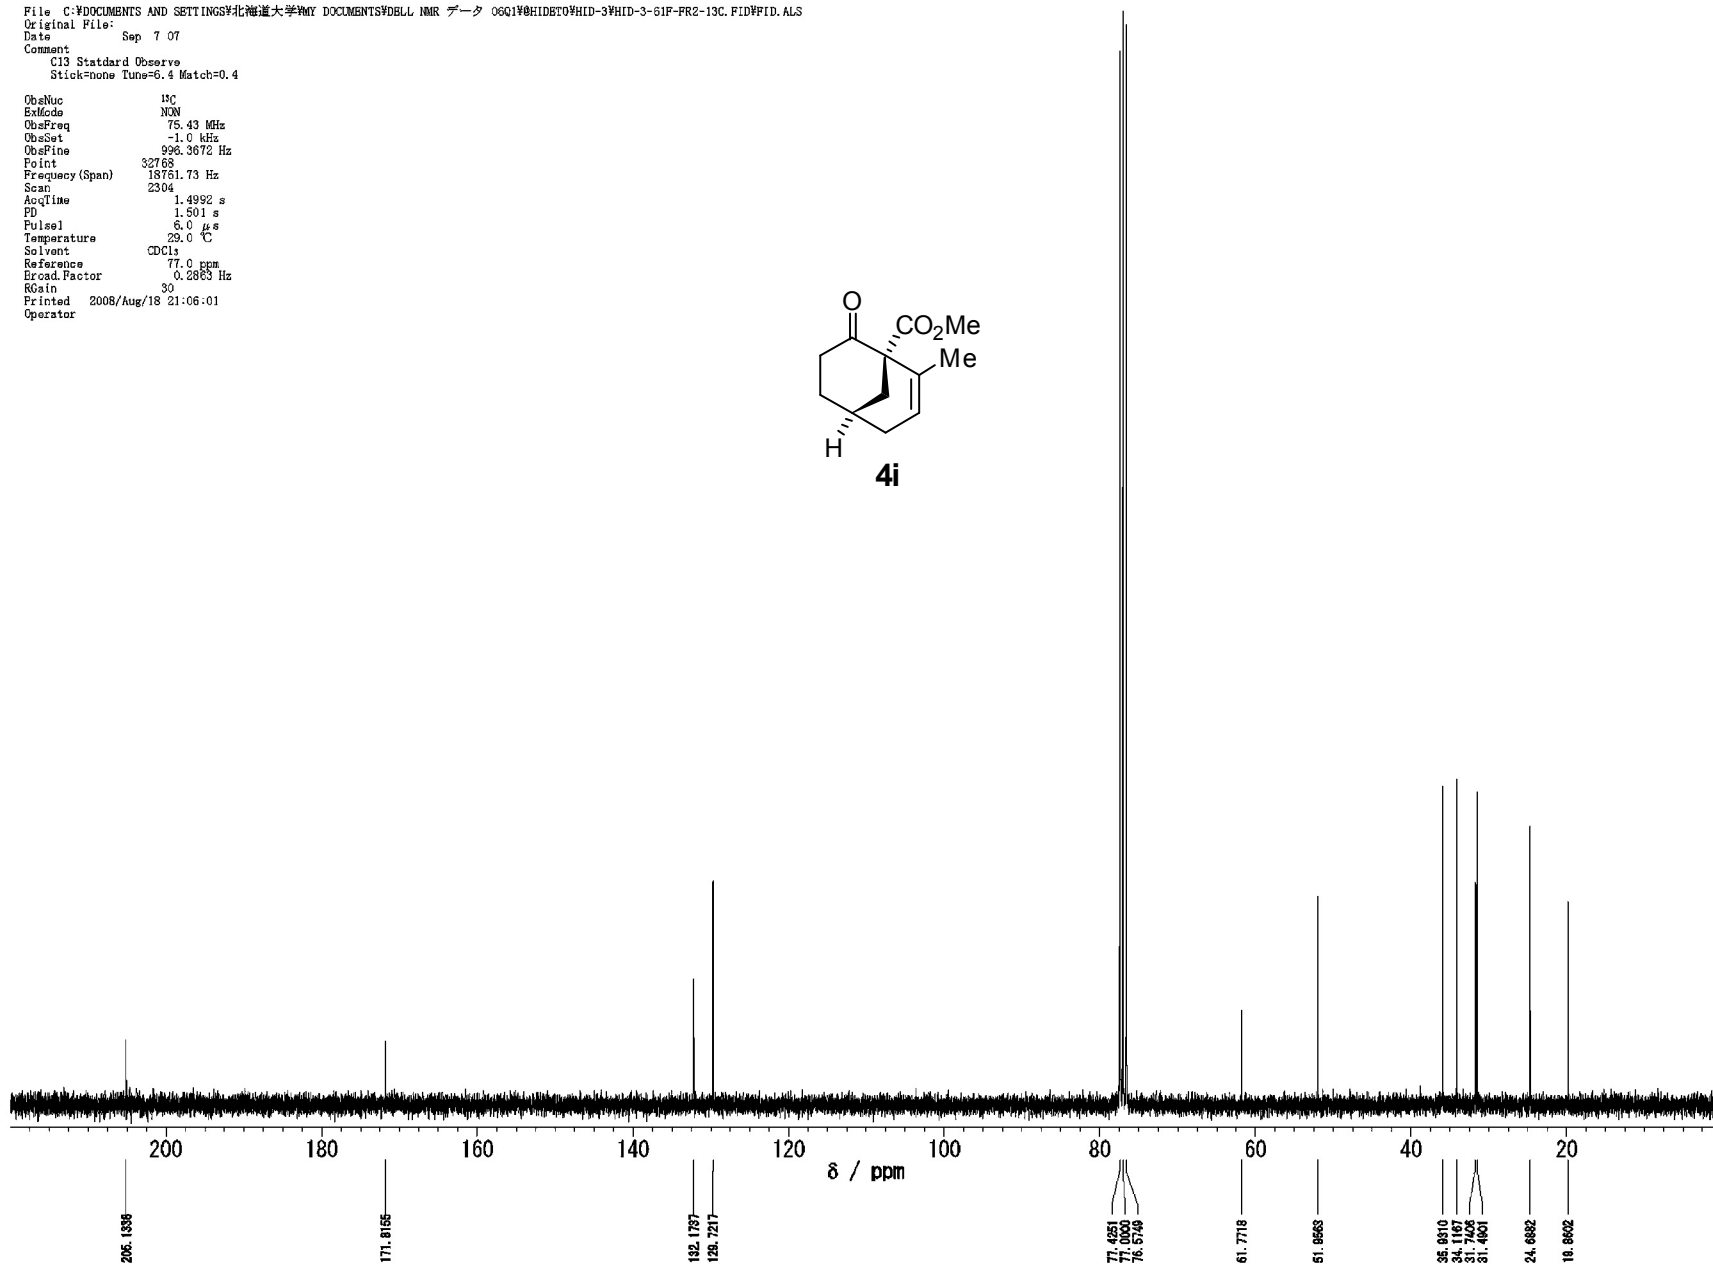

File C:\DOCUMENTS AND SETTINGS\北海道大学\MY DOCUMENTS\DELL NMR データ 06Q1\HIDETOWHID-4\HID-4-32B-FR1-1H.FID\FID.ALS

Original File: Nov 28 07

Date: Nov 28 07

Comment: STANDARD 1H CDESRV

ObsNuc 1H  
ExMode NON  
ObsFreq 299.96 MHz  
ObsSet -1.0 kHz  
ObsPine 995.0047 Hz  
Point 16384  
Frequency(Span) 4500.45 Hz  
Scan 32  
AcqTime 3.4983 s  
PD 1.502 s  
Pulse1 6.0  $\mu$ s  
Temperature 29.0  $^{\circ}$ C  
Solvent CDCl<sub>3</sub>  
Reference 0.0 ppm  
Broad.Factor 0.1373 Hz  
RGain 6  
Printed 2008/Aug/26 21:51:55  
Operator

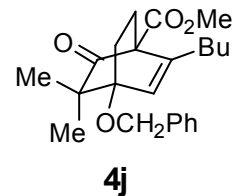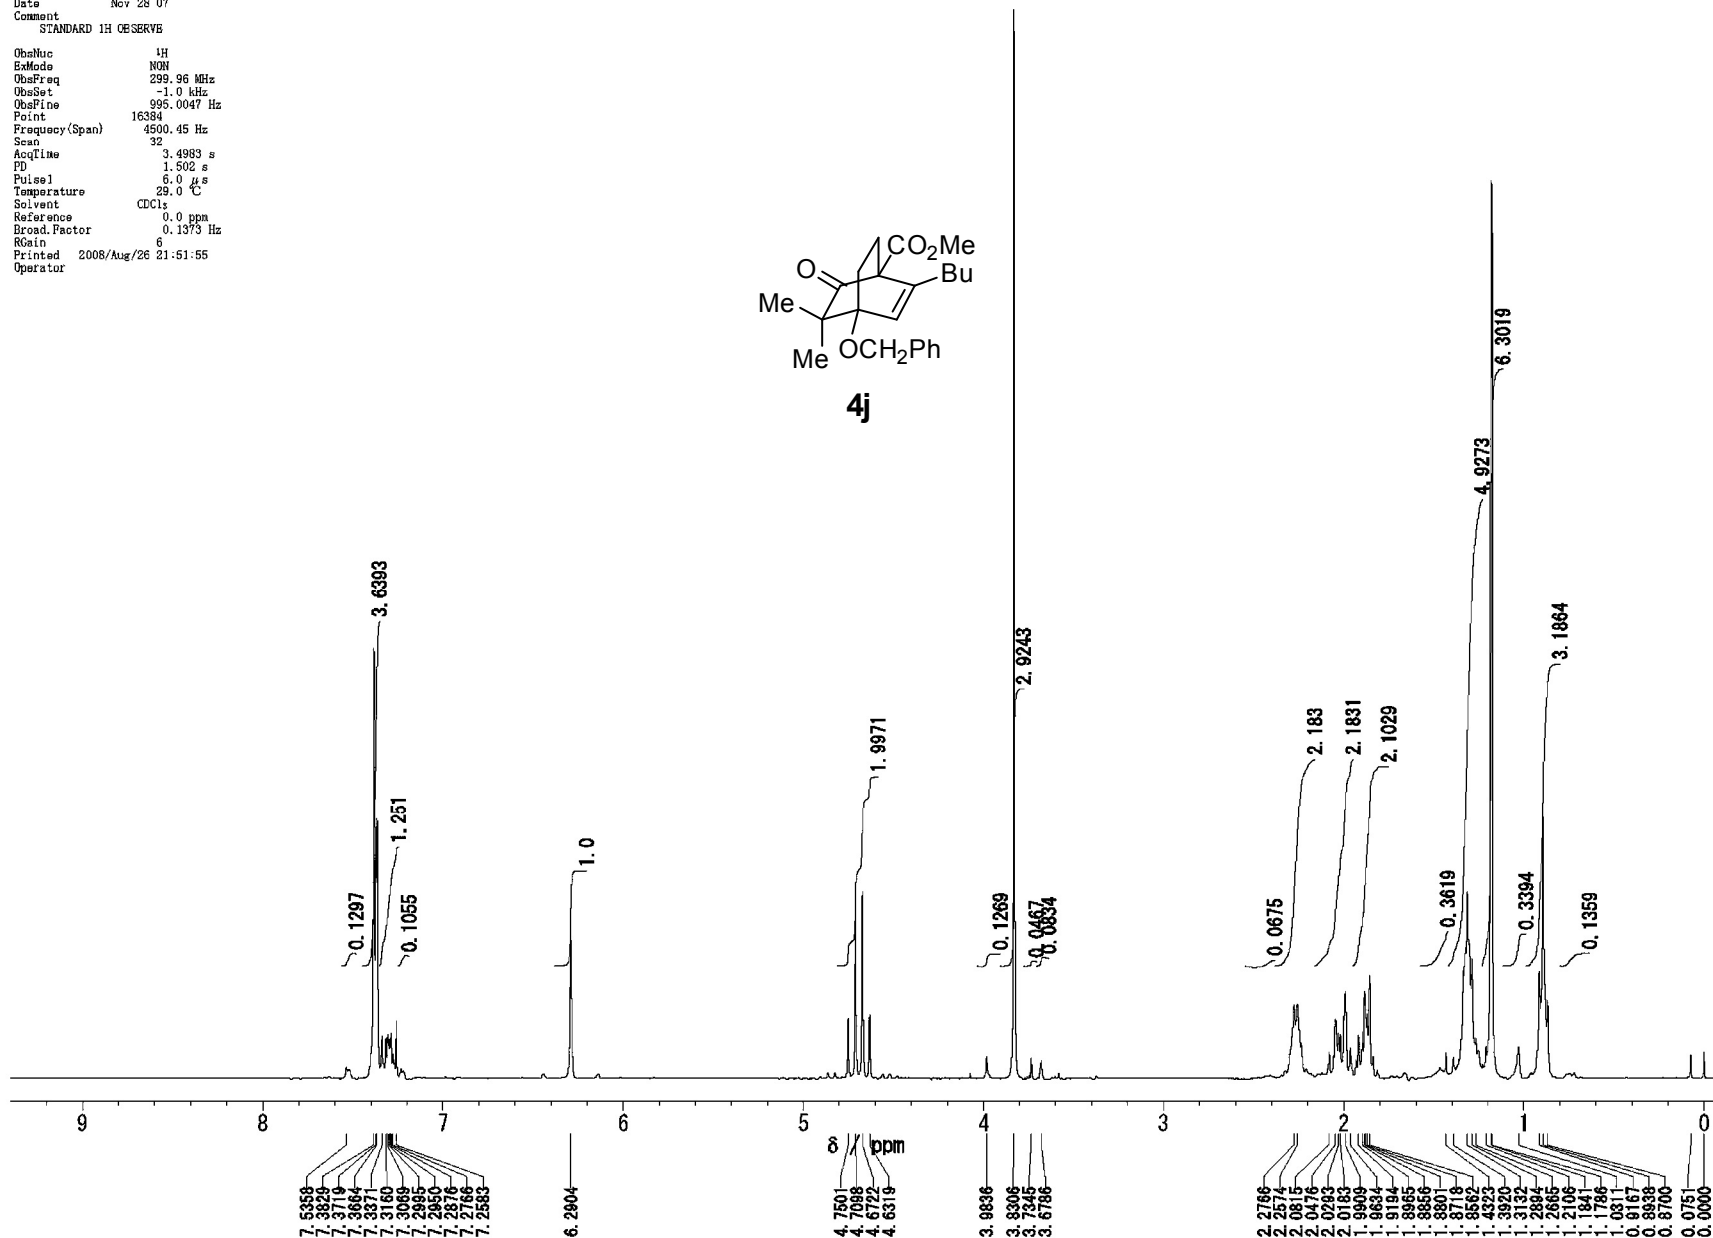

File C:\DOCUMENTS AND SETTINGS\北海道大学\MY DOCUMENTS\DELL NMR データ 06Q1\HIDETO\HID-4\HID-4-32C-PR1-13C.FID\FID.ALS

Original File:

Date Nov 28 07

Comment

C13 Standard Observe  
Stick:none Tuns=6.4 Match=0.4

ObsHuc 13C  
ExMode NON  
ObsFwq 75.43 MHz  
ObsSet -1.0 kHz  
ObsPine 996.3672 Hz  
Point 32768  
Frequency(Span) 13761.73 Hz  
Scan 576  
AcqTime 1.4992 s  
PD 1.601 s  
Pulse1 6.0  $\mu$ s  
Temperature 29.0  $^{\circ}$ C  
Solvent CDCl<sub>3</sub>  
Reference 77.0 ppm  
Broad.Factor 0.2863 Hz  
RGain 30  
Printed 2008/Aug/26 21:48:27  
Operator

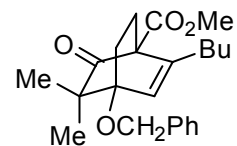

4j

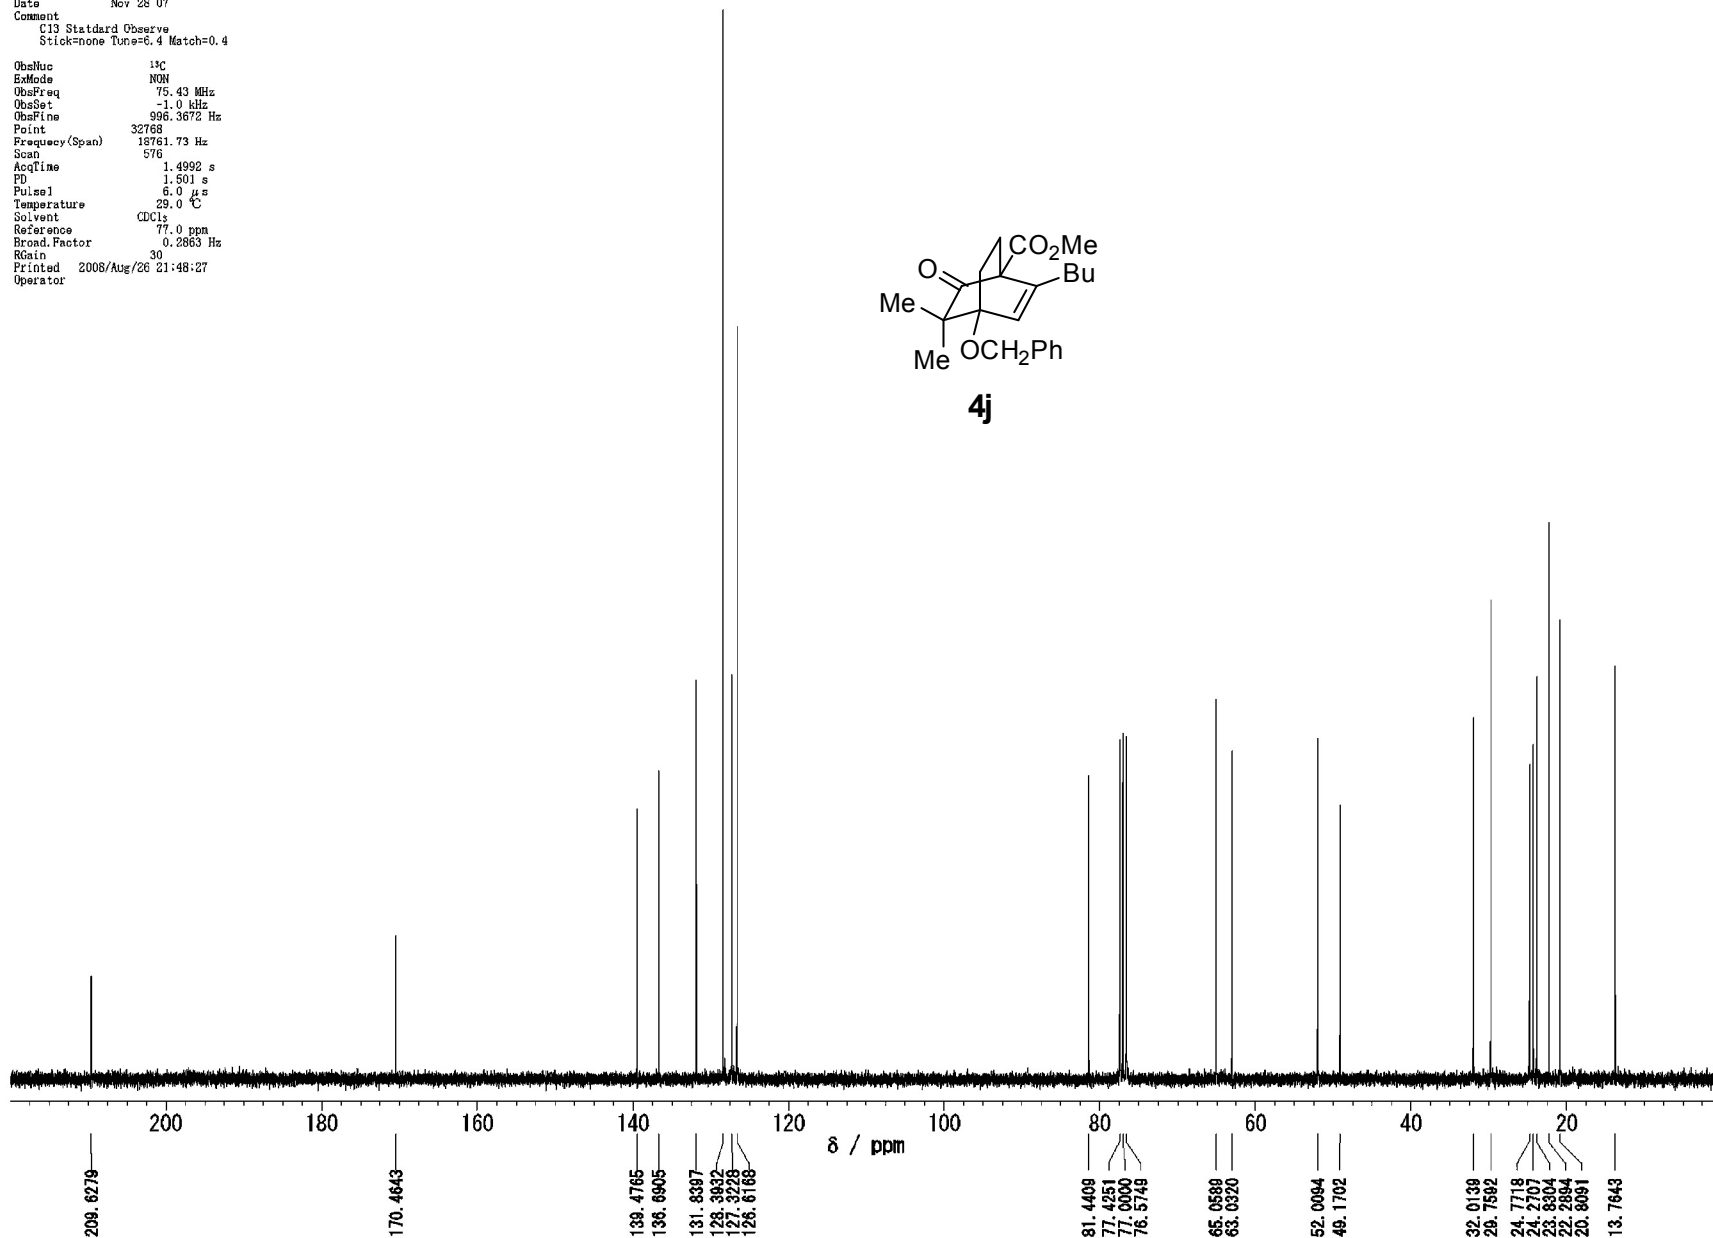

Supplement: Supplementary file 1 [file 4600867]
